# Supplementary material for: Identification and Functional Characterization of N-Terminally Acetylated Proteins in Drosophila melanogaster
Source: PLoS Biol. 2009 Nov 3;7(11):e1000236. doi: 10.1371/journal.pbio.1000236 (PMC2762599; doi:10.1371/journal.pbio.1000236)
Supplement: Table S1 — Compilation of all N-terminal peptides identified in this study. (0.28 MB XLS) [file pbio.1000236.s004.xls]

## Sheet: Table S1
Table S1: Compilation of all N-terminal peptides identified in this study
Acetylation-Status	Peptide Sequence	Accession	Start	Stop	Previous AA	Consecutive-AA	Protein-fraction	Alternative IDs
Ace	AAAADLVVPTLAIR	CG7414-PA	2	15	M	S	COF.SAX.CYT,COF.SCX.CYT,COF.SCX.MEM,COF.SCX.NUC
Ace	AAAGEAIDGVYSVR	CG1925-PA	2	15	M	L	COF.SCX.MEM,COF.SCX.NUC
Ace	AAAIKKIIPMLDR	CG11267-PA	2	14	M	I	COF.SAX.CYT,COF.SCX.CYT,COF.SCX.MEM,COF.SCX.NUC
Ace	AAAPKDIEKPHVGDSASVHR	CG15693-PA	2	21	M	I	SG.KcC
Ace	AAAQQTEFQKNFR	CG14543-PA	2	14	M	V	COF.SCX.CYT
Ace	AAASGELSK	CG12141-PA	2	10	M	N	SG.KcC,SG.KcM,COF.SAX.CYT,COF.SCX.CYT,COF.SCX.MEM,COF.SCX.NUC
Ace	AAAVVQSFGQEELFVSR	CG13117-PA	2	18	M	A	SG.KcGel,COF.SCX.CYT,COF.SCX.NUC
Ace	AADQAHFQQLLASLLSTDNDVR	CG1059-PA	2	23	M	Q	SG.KcNR,SG.extract,SG.chr
Ace	AAEEGKFDNILLAVAEK	CG9710-PA	2	18	M	H	SG.extract
Ace	AAEIKPAQR	CG5168-PA	2	10	M	T	COF.SAX.CYT,COF.SCX.CYT,COF.SCX.NUC
Ace	AAFMEEALVEAR	CG5292-PA	2	13	M	R	COF.SCX.CYT,COF.SCX.MEM,COF.SCX.NUC
Ace	AAGADTQLEHMCR	CG7070-PA	23	35	M	L	SG.KcM,SG.extract,SG.chr,COF.SAX.CYT	CG7070-PB	2	14	M	L
Ace	AAGLEQLQGLLQSLGELKDLPLNR	CG33113-PD	2	25	M	E	SG.KcNR,SG.chr	CG33113-PG	2	25	M	E
Ace	AAGTTLQKAIDLVTKATEEDR	CG6842-PA	2	22	M	N	COF.SCX.CYT,COF.SCX.MEM
Ace	AAIAALPTTTLR	CG12972-PA	2	13	M	R	COF.SAX.CYT
Ace	AAIKDSLLAQVAEVLPSSGHK	CG10160-PA	2	22	M	V	SG.KcC,SG.KcNR
Ace	AAKKLGMDFVKQMSEYASGSNGFDR	CG16985-PA	2	26	M	V	COF.SCX.MEM,COF.SCX.NUC
Ace	AAKPEDKSTDIPDR	CG12306-PA	2	15	M	L	COF.SAX.CYT,COF.SCX.CYT,COF.SCX.NUC
Ace	AANIAAAAAAAQEVDPVLKK	CG5491-PA	2	21	M	A	SG.chr
Ace	AANKER	CG2210-PA	21	26	M	T	COF.SAX.CYT	CG5870-PA	1324	1329	I	L
Ace	AANYGISTAALR	CG8725-PA	2	13	M	S	COF.SAX.CYT,COF.SCX.MEM,COF.SCX.NUC
Ace	AAPAPALKDLPK	CG4944-PA	2	13	M	V	SG.KcC,SG.KcGel,SG.KcM,SG.KcN	CG4944-PB	2	13	M	V	CG4944-PC	2	13	M	V
Ace	AAQFFNR	CG10691-PA	2	8	M	I	SG.Golgi,SG.chr,COF.SCX.MEM	CG10691-PB	2	8	M	I
Ace	AAQTILFDFTLDKDK	CG4300-PA	2	16	M	T	SG.KcC,SG.chr,COF.SCX.CYT	CG4300-PB	2	16	M	T
Ace	AASDKSVDDSLYPIAVLIDELKNEDVQLR	CG33297-PA	2	30	M	L	SG.KcNR,SG.extract,COF.SCX.CYT	CG33297-PB	2	30	M	L	CG33297-PC	2	30	M	L
Ace	AASGTNLDSGICPVAGDSGCR	CG2915-PA	26	46	M	G	COF.SAX.CYT,COF.SCX.CYT	CG2915-PB	26	46	M	G
Ace	AASMDEDITANPPPSSEEDPLAEER	CG11419-PA	2	26	M	L	COF.SCX.CYT
Ace	AASQVDQKR	CG10326-PA	2	10	M	A	COF.SAX.CYT,COF.SCX.NUC
Ace	AATALEVESEER	CG12238-PA	165	176	M	D	COF.SCX.CYT
Ace	AATAPVIMR	CG7789-PA	2	10	M	V	COF.SAX.CYT,COF.SCX.CYT
Ace	AATDIAEEAFHLR	CG5958-PA	2	14	M	L	SG.chr,COF.SAX.CYT
Ace	AATIASAKDPLTGPR	CG3298-PB	25	39	M	Y	COF.SAX.CYT,COF.SCX.CYT
Ace	AATLKPYLTAVR	CG5972-PA	2	13	M	H	COF.SAX.CYT,COF.SCX.CYT,COF.SCX.MEM,COF.SCX.NUC
Ace	AAVENAEPR	CG9474-PA	2	10	M	T	COF.SCX.MEM,COF.SCX.NUC
Ace	AAVTKKIKR	CG7726-PA	2	10	M	D	COF.SAX.CYT,COF.SCX.NUC
Ace	AAYTEDQLAEFQEAFNLFDNR	CG3201-PA	2	22	M	G	SG.Golgi,SG.KcGel,SG.KcNR,SG.extract,SG.chr,COF.SCX.CYT
Ace	ADAAHQEFAR	CG9453-PA	2	11	M	R	COF.SAX.CYT	CG9453-PB	34	43	M	R	CG9453-PC	41	50	M	R	CG9453-PD	34	43	M	R	CG9453-PE	34	43	M	R	CG9453-PF	34	43	M	R	CG9453-PG	2	11	M	R	CG9453-PH	2	11	M	R	CG9453-PI	34	43	M	R	CG9453-PJ	2
Ace	ADDEQEDQKEYR	CG11115-PA	2	13	M	W	COF.SCX.CYT
Ace	ADDLLQFR	CG4645-PA	6	13	M	D	COF.SCX.MEM,COF.SCX.NUC
Ace	ADDPENSVDRPTDDGDAGKPEK	CG8998-PA	2	23	M	M	SG.KcC,SG.chr
Ace	ADEKAKESFR	CG1609-PA	2	11	M	E	COF.SCX.CYT
Ace	ADEQPNLVAGHPPALK	CG12384-PA	2	17	M	A	SG.KcGel,SG.KcM,SG.chr
Ace	ADETEQLSQVILPVKEPLDLIR	CG31184-PA	2	23	M	L	SG.KcGel,SG.KcM,SG.chr,COF.SCX.CYT,COF.SCX.NUC
Ace	ADFQEQLR	CG13663-PA	2	9	M	Q	COF.SCX.MEM
Ace	ADGSTILR	CG3403-PA	4	11	M	R	COF.SCX.CYT,COF.SCX.MEM
Ace	ADIVYPTGCRPLVEDLGTDELIR	CG17509-PA	2	24	M	R	SG.chr
Ace	ADKAAAEKPAGR	CG30415-PA	2	13	M	P	COF.SCX.MEM,COF.SCX.NUC	CG30415-PB	2	13	M	P
Ace	ADKAQEQSIMDKSMR	CG7697-PA	2	16	M	S	COF.SCX.CYT,COF.SCX.NUC
Ace	ADKKVGGNNDGKEKR	CG13277-PA	2	16	M	R	COF.SAX.CYT
Ace	ADLQQIASNNER	CG8235-PA	31	42	M	A	COF.SAX.CYT,COF.SCX.CYT,COF.SCX.MEM,COF.SCX.NUC
Ace	ADMEIQSNKMSITEETQVTR	CG18619-PB	2	21	M	K	COF.SCX.MEM,COF.SCX.NUC	CG18619-PC	2	21	M	K
Ace	ADNAEPLTLSR	CG7662-PA	2	12	M	D	COF.SCX.MEM,COF.SCX.NUC	CG7662-PB	2	12	M	D
Ace	ADNDDLLDYEDEEQTETTAVENQEAPKK	CG7269-PA	2	29	M	D	SG.KcC,SG.chr	CG7269-PB	2	29	M	D	CG7269-PC	2	29	M	D
Ace	ADPEDYDLNFVQLSR	CG4558-PA	2	16	M	Q	COF.SCX.MEM,COF.SCX.NUC
Ace	ADPLSLLR	CG11990-PA	2	9	M	Q	COF.SCX.MEM
Ace	ADQKLLQTPLAQGDPELAELIKKEKER	CG3011-PA	72	98	M	Q	COF.SCX.CYT
Ace	ADQLTEEQIAEFK	CG8472-PA	2	14	M	E	SG.Golgi,SG.KcC,SG.KcN,SG.KcNR,SG.Mito,SG.extract,COF.SCX.CYT	CG8472-PB	2	14	M	E
Ace	ADQVDENLKK	CG8332-PA	2	11	M	K	SG.KcGel,SG.extract,SG.chr,COF.SAX.CYT,COF.SCX.CYT,COF.SCX.MEM,COF.SCX.NUC
Ace	ADRPCAGNILR	CG2789-PA	2	12	M	I	SG.KcM,SG.KcNR
Ace	ADSKGEDLATAILK	CG2331-PA	2	15	M	R	SG.KcC,SG.KcM,SG.KcN,SG.chr,COF.SAX.CYT,COF.SCX.CYT,COF.SCX.MEM,COF.SCX.NUC
Ace	ADSPACSSSDHSPLAKKR	CG1782-PA	9	26	M	R	COF.SAX.CYT
Ace	ADTANYINDR	CG7188-PA	2	11	M	F	COF.SCX.MEM,COF.SCX.NUC	CG7188-PB	2	11	M	F
Ace	ADTKGFSSIETPGYVGFANLPNQVHR	CG1403-PA	2	27	M	K	SG.KcC	CG1403-PB	2	27	M	K
Ace	ADVAEQKNETPVVEK	CG2207-PA	2	16	M	V	SG.Golgi,SG.KcGel,SG.KcM,SG.KcN,SG.extract,SG.chr	CG2207-PB	2	16	M	V
Ace	ADVDDFDSLSNAELR	CG5581-PA	2	16	M	A	COF.SAX.CYT,COF.SCX.CYT,COF.SCX.MEM,COF.SCX.NUC
Ace	ADVDVDVPSAAPVLDGAMDINTALQEVLK	CG11271-PA	2	30	M	K	SG.KcGel,SG.KcM,SG.KcNR,SG.extract,SG.chr	CG11271-PB	2	30	M	K	CG11271-PC	2	30	M	K	CG11271-PF	2	30	M	K
Ace	ADVEKEPEKTIAEDLVVTK	CG10576-PA	2	20	M	Y	SG.KcM,SG.chr
Ace	ADVLDIDNAEEFEVDEDGDQGIVR	CG8781-PA	2	25	M	L	COF.SCX.CYT
Ace	ADVSDPSELFDLELHDLELQDDK	CG10539-PA	2	24	M	A	SG.KcM,SG.chr
Ace	AEAMVVEDR	CG11982-PA	2	10	M	P	SG.chr,COF.SAX.CYT,COF.SCX.CYT
Ace	AEANLDKKPEVKPPPGLK	CG6054-PA	2	19	M	A	SG.KcC
Ace	AEDSGALESSYDFSIVQPDDHEYGEADIR	CG6450-PC	2	30	M	L	SG.chr
Ace	AEDTEYKKLPVEER	CG5000-PA	2	15	M	C	COF.SCX.CYT,COF.SCX.MEM
Ace	AEEIDDNEFYR	CG31935-PA	2	12	M	E	COF.SCX.CYT,COF.SCX.MEM
Ace	AEEPEEPAKSFVIFGR	CG7620-PA	2	17	M	D	COF.SCX.MEM
Ace	AEFEEDLPHNGLMDGIASGVGVPVEALR	CG9655-PA	2	29	M	L	SG.KcM,SG.chr	CG9655-PB	2	29	M	L	CG9655-PC	2	29	M	L
Ace	AEFIAEMQER	CG7246-PA	2	11	M	L	COF.SAX.CYT,COF.SCX.MEM,COF.SCX.NUC
Ace	AEFLDSEAEESEEEEELDVNER	CG12225-PA	2	23	M	K	COF.SCX.CYT
Ace	AEFSVER	CG7041-PA	2	8	M	V	COF.SCX.CYT
Ace	AEGDYAEHVER	CG3860-PA	2	12	M	T	COF.SAX.CYT
Ace	AEGNGELLDDINQKADDR	CG17838-PA	36	53	M	G	COF.SAX.CYT,COF.SCX.CYT	CG17838-PB	2	19	M	G	CG17838-PC	2	19	M	G	CG17838-PD	44	61	M	G	CG17838-PE	44	61	M	G	CG17838-PF	2	19	M	G
Ace	AEGNTAGGEDQKLTDIFLK	CG31852-PA	2	20	M	G	SG.chr
Ace	AEGVESIKLEALSLSEGIR	CG3704-PA	2	20	M	E	COF.SCX.CYT
Ace	AEKPLADCPDSGQVR	CG1800-PA	2	16	M	K	SG.KcM
Ace	AEKVELLAQASMNGQQNDTR	CG13124-PA	2	21	M	K	COF.SCX.MEM,COF.SCX.NUC	CG13124-PB	2	21	M	K
Ace	AELDDFFAKK	CG3760-PA	2	11	M	D	SG.KcGel	CG3760-PB	2	11	M	D
Ace	AELVRDWLADYQR	CG6406-PA	2	14	M	I	SG.KcNR	CG6406-PB	2	14	M	I
Ace	AEQNDSNGNYDDGEEITEPEQLR	CG12749-PA	2	24	M	K	SG.KcGel,SG.KcM,SG.extract,SG.chr,COF.SCX.CYT,COF.SCX.MEM	CG12749-PB	2	24	M	K
Ace	AERPKNLFATGSSR	CG9738-PA	2	15	M	S	COF.SAX.CYT
Ace	AETETKHHPEHHDDDVHDANYQAPPEK	CG7823-PA	2	28	M	T	SG.KcC
Ace	AETINNKPSIQIR	CG1623-PA	2	14	M	S	SG.extract	CG1623-PB	2	14	M	S	CG1623-PC	2	14	M	S	CG1623-PD	2	14	M	S	CG1623-PE	2	14	M	S
Ace	AETPTPAENSPAPADENAPPQAVR	CG13751-PA	11	34	M	E	COF.SCX.CYT
Ace	AEVLPKKR	CG18012-PA	2	9	M	N	COF.SCX.MEM,COF.SCX.NUC
Ace	AEVQLVNDLLLDLR	CG7867-PD	8	21	M	H	COF.SCX.CYT
Ace	AEYLASIFGTEKDK	CG3582-PA	2	15	M	V	SG.chr
Ace	AFDAIPKDLR	CG12372-PA	2	11	M	G	COF.SAX.CYT,COF.SCX.CYT,COF.SCX.MEM,COF.SCX.NUC
Ace	AFNKLSIENLDLAGKR	CG3127-PA	2	17	M	V	SG.KcC,COF.SCX.CYT,COF.SCX.NUC
Ace	AGATLFER	CG10149-PA	19	26	M	A	COF.SCX.CYT	CG10149-PB	2	9	M	A
Ace	AGATNADIKR	CG4446-PA	2	11	M	V	COF.SAX.CYT,COF.SCX.CYT	CG4446-PB	2	11	M	V
Ace	AGEVIVDALPYIDHGYDDVGVR	CG4980-PA	2	23	M	E	SG.chr
Ace	AGFVAVHTGAGNCIDETK	CG5241-PA	2	19	M	Y	SG.extract
Ace	AGNSAAAGGDIDESLYSR	CG1782-PA	185	202	M	Q	COF.SAX.CYT,COF.SCX.CYT,COF.SCX.MEM,COF.SCX.NUC
Ace	AGRDAASNQLIDYKNSQTVSPGAITTGNGAPIGIK	CG6871-PA	2	36	M	D	SG.KcC
Ace	AGVLFEDIFNVKDMDPEGK	CG11246-PA	2	20	M	K	SG.KcC,COF.SCX.CYT
Ace	AHEGEQFIKDIQR	CG4206-PA	2	14	M	E	SG.KcC,COF.SAX.CYT
Ace	AHKQSTNNETSNGSTTEIIDETDAR	CG13994-PA	2	26	M	A	SG.KcC
Ace	AHMSHMLQQPSGSTPSNVGSSSSR	CG5179-PA	2	25	M	T	SG.KcC
Ace	AHNYLQPVHDHFDDVDRFEDVDDDLFLQNKR	CG11173-PA	2	32	M	T	SG.KcC
Ace	AHTGGNLSGNMQPPPPSGGR	CG1418-PA	2	21	M	F	SG.KcM,COF.SAX.CYT
Ace	AHYKGAASEAGR	CG12259-PA	2	13	M	A	COF.SAX.CYT
Ace	AIIMTESSYER	CG7242-PA	2	12	M	R	COF.SCX.MEM
Ace	AIQLDKILQDIAKEK	CG1825-PA	2	16	M	V	SG.KcC
Ace	AKFYKLDINR	CG7393-PA	6	15	M	T	COF.SAX.CYT
Ace	AKHHPDLIFCR	CG9548-PA	2	12	M	K	COF.SAX.CYT
Ace	AKNTSSNAFR	CG9881-PA	2	11	M	K	COF.SAX.CYT,COF.SCX.CYT,COF.SCX.NUC
Ace	AKPQHILQLSQEQR	CG15739-PA	2	15	M	S	SG.KcC,COF.SAX.CYT
Ace	AKSDQELPEGFR	CG13688-PA	2	13	M	Q	COF.SAX.CYT,COF.SCX.CYT,COF.SCX.NUC
Ace	ALAEICKISNAPYMR	CG12323-PA	2	16	M	P	COF.SAX.CYT	CG12323-PB	2	16	M	P
Ace	ALIPAVTR	CG12375-PA	2	9	M	L	COF.SAX.CYT
Ace	ALKKVKGNFFER	CG10986-PB	2	13	M	M	COF.SAX.CYT
Ace	ALLTMIAR	CG7359-PA	2	9	M	V	COF.SCX.MEM,COF.SCX.NUC
Ace	ALPGNGIYVVR	CG8487-PA	2	12	M	G	COF.SAX.CYT,COF.SCX.CYT,COF.SCX.MEM	CG8487-PB	2	12	M	G
Ace	ALPQISTADQAK	CG9878-PA	2	13	M	L	SG.KcM	CG9878-PB	2	13	M	L
Ace	ALPQKHFKR	CG6673-PA	2	10	M	G	COF.SAX.CYT	CG6673-PB	2	10	M	G
Ace	ALQTYGDKPVAFQLEEGGEYYYVGSEVGNYMR	CG1064-PA	2	33	M	H	SG.chr
Ace	ALSALASFDDLR	CG13345-PA	2	13	M	R	SG.Golgi,COF.SAX.CYT,COF.SCX.CYT,COF.SCX.MEM,COF.SCX.NUC
Ace	ALSIFKDLPAEHPR	CG11134-PA	2	15	M	H	SG.KcC
Ace	ALSVEIER	CG8902-PA	2	9	M	V	COF.SCX.MEM
Ace	ALSVPKAPGVSQMLKDGAR	CG8258-PA	2	20	M	M	COF.SAX.CYT,COF.SCX.CYT,COF.SCX.MEM
Ace	ALVCALTNEVPETPVVSPHSGAVFEK	CG5519-PA	2	27	M	R	SG.KcC,SG.KcM,SG.KcN,SG.extract,SG.chr
Ace	ALVKPKSELTPEELAR	CG1249-PA	2	17	M	Q	COF.SAX.CYT,COF.SCX.CYT,COF.SCX.MEM,COF.SCX.NUC
Ace	ALVTVQR	CG6238-PA	2	8	M	S	SCX.CYT
Ace	AMSKVIR	CG6562-PA	2	8	M	V	COF.SAX.CYT,COF.SCX.NUC, SG.KcM	CG6562-PB	2	8	M	V
Ace	ANATGQVSNMSVLR	CG9795-PC	29	42	M	E	SCX.CYT
Ace	ANFDDTLQR	CG11140-PA	2	10	M	A	COF.SCX.MEM	CG11140-PB	2	10	M	A	CG11140-PC	2	10	M	A	CG11140-PD	2	10	M	A	CG11140-PE	2	10	M	A	CG11140-PF	67	75	M	A	CG11140-PG	67	75	M	A	CG11140-PH	67	75	M	A	CG11140-PI	2	10	M	A
Ace	ANFDLTR	CG9677-PA	2	8	M	I	COF.SAX.CYT,COF.SCX.MEM,COF.SCX.NUC
Ace	ANIPLLLSLADDLGR	CG4463-PA	2	16	M	M	SG.extractCOF.SCX.CYT,COF.SCX.MEM,COF.SCX.NUC
Ace	ANTSSTGVVVPR	CG10640-PA	2	13	M	N	COF.SAX.CYT,COF.SCX.CYT,COF.SCX.MEM
Ace	ANTYFDEYENLEIHELMLK	CG16840-PA	2	20	M	D	SG.KcGel,SG.extract,SG.chr
Ace	ANVESLYKELTAEWSKRPPNTVK	CG4157-PA	2	24	M	C	SG.KcC
Ace	ANVESMIVEEKTQVKQIDR	CG6046-PA	2	20	M	E	SCX.CYT,COF.SCX.MEM,COF.SCX.NUC
Ace	AQEGQDIPTFKCVLVGDGGTGKTTFVKR	CG1404-PA	2	29	M	H	SCX.CYT	CG1404-PB	2	29	M	H
Ace	AQIIDGKAIAQEVR	CG18466-PA	2	15	M	T	COF.SAX.CYT,COF.SCX.CYT,COF.SCX.MEM,COF.SCX.NUC	CG18466-PB	8	21	M	T
Ace	AQKAKFER	CG1009-PA	2	9	M	L	COF.SAX.CYT	CG1009-PB	2	9	M	L	CG1009-PC	211	218	M	L	CG1009-PD	2	9	M	L	CG1009-PE	189	196	M	L	CG1009-PF	2	9	M	L
Ace	AQKIKAGPVVDVLGDEMTR	CG7176-PA	2	20	M	I	COF.SAX.CYT,COF.SCX.CYT,COF.SCX.MEM,COF.SCX.NUC	CG7176-PB	36	54	M	I	CG7176-PC	55	73	M	I	CG7176-PD	23	41	M	I	CG7176-PE	2	20	M	I	CG7176-PF	2	20	M	I	CG7176-PG	36	54	M	I
Ace	AQKVIKYIGR	CG13037-PA	2	11	M	T	COF.SCX.NUC
Ace	AQLTQMTNEQLR	CG12505-PA	2	13	M	E	COF.SAX.CYT,COF.SCX.CYT,COF.SCX.MEM,COF.SCX.NUC
Ace	AQPQLLQIKLSR	CG30084-PA	2	13	M	F	COF.SCX.CYT,COF.SCX.NUC	CG30084-PB	2	13	M	F	CG30084-PC	2	13	M	F	CG30084-PD	2	13	M	F
Ace	AQPQPPAYENKNIYATLPR	CG10724-PA	2	20	M	T	COF.SAX.CYT,COF.SCX.NUC
Ace	AQQQGMDSALFER	CG4845-PA	2	14	M	R	COF.SCX.CYT,COF.SCX.NUC
Ace	AQVAFLDNLLR	CG6005-PA	2	12	M	E	COF.SCX.CYT,COF.SCX.MEM
Ace	AQVPLAIVSHK	CG9306-PA	2	12	M	R	SG.KcM
Ace	ASAADDSALGGQEER	CG7158-PA	2	16	M	E	COF.SCX.CYT,COF.SCX.MEM
Ace	ASDKIKVAVR	CG8183-PA	2	11	M	V	COF.SCX.CYT,COF.SCX.MEM	CG8183-PB	2	11	M	V
Ace	ASDSGSDYEVEAFFNPKR	CG3594-PA	2	19	M	V	COF.SCX.NUC
Ace	ASEDVQITSVIDANGQSLPLHGNSLGGPLGPPVK	CG32737-PD	2	35	M	Q	SG.chr
Ace	ASEGENVVMESPGR	CG1646-PB	2	15	M	R	COF.SCX.CYT,COF.SCX.NUC	CG1646-PD	2	15	M	R
Ace	ASELDQFADLELSKEDR	CG1691-PD	2	18	M	E	SG.Golgi,SG.chr,COF.SCX.CYT,COF.SCX.MEM,COF.SCX.NUC	CG1691-PE	2	18	M	E	CG1691-PF	2	18	M	E	CG1691-PG	2	18	M	E	CG1691-PH	2	18	M	E
Ace	ASENIMDELASLIR	CG9749-PA	8	21	M	T	COF.SCX.CYT,COF.SCX.MEM,COF.SCX.NUC
Ace	ASEVAQIPAEETPAVAAAEK	CG4609-PA	2	21	M	S	SG.Golgi,SG.KcGel,SG.KcM,SG.KcNR,SG.Mito,SG.extract
Ace	ASEVEKSQTAAASEDTIFGK	CG2862-PA	26	45	M	I	SG.KcC,COF.SCX.CYT,COF.SCX.MEM,COF.SCX.NUC	CG2862-PB	2	21	M	I
Ace	ASFQIHQDMSNKENPGIKIPAGVK	CG5940-PA	2	25	M	N	SG.KcC
Ace	ASGVTVSDVCKTTYEEIKKDKKHR	CG4254-PA	2	25	M	Y	COF.SAX.CYT
Ace	ASHQYHQIANLLEK	CG5366-PA	2	15	M	M	SG.KcC,SG.chr
Ace	ASISLLNPKAEFAR	CG8231-PA	2	15	M	A	COF.SAX.CYT,COF.SCX.CYT,COF.SCX.MEM,COF.SCX.NUC
Ace	ASIVEKVR	CG10898-PA	2	9	M	R	COF.SAX.CYT,COF.SCX.CYT
Ace	ASKENIADNMEKFSLK	CG8975-PA	2	17	M	S	SG.KcC
Ace	ASKKYSDVNLYDLLGISLESDQNEIR	CG17187-PA	2	27	M	K	COF.SCX.CYT
Ace	ASLATKGSGLVNR	CG6105-PA	2	14	M	L	COF.SCX.MEM,COF.SCX.NUC
Ace	ASLGGQHGNISTNPEVENTAK	CG14998-PA	2	22	M	R	SG.KcM,SG.extract,SG.chr	CG14998-PB	2	22	M	R	CG14998-PD	2	22	M	R	CG14998-PE	2	22	M	R
Ace	ASLYVGDLPQDVNESGLFDK	CG5119-PA	2	21	M	F	SG.KcM,SG.extract	CG5119-PB	2	21	M	F	CG5119-PC	2	21	M	F	CG5119-PD	2	21	M	F	CG5119-PE	2	21	M	F	CG5119-PF	2	21	M	F	CG5119-PG	2	21	M	F	CG5119-PH	2	21	M	F
Ace	ASNFTQSQPSR	CG15717-PA	2	12	M	I	COF.SAX.CYT,COF.SCX.CYT
Ace	ASNIFAAEKDNGVKNNGDAPR	CG31363-PA	44	64	M	R	SG.KcC,COF.SAX.CYT,COF.SCX.CYT,COF.SCX.NUC	CG31363-PC	50	70	M	R	CG31363-PD	44	64	M	R
Ace	ASNILLQLAAEDPQR	CG3579-PA	30	44	M	D	COF.SCX.CYT
Ace	ASNYEGYKSPLSTR	CG3590-PA	2	15	M	Y	COF.SAX.CYT,COF.SCX.CYT,COF.SCX.NUC
Ace	ASPAAGPSKQEIESVFSR	CG6838-PA	2	19	M	L	COF.SCX.CYT,COF.SCX.MEM,COF.SCX.NUC	CG6838-PB	2	19	M	L
Ace	ASQTQGIQQLLAAEK	CG6213-PA	2	16	M	K	SG.KcGel,SG.KcNR,COF.SCX.CYT,COF.SCX.MEM
Ace	ASSKELCSIR	CG11141-PA	2	11	M	E	COF.SAX.CYT	CG11141-PB	2	11	M	E
Ace	ASSPITDFYAGR	CG8306-PA	2	13	M	N	COF.SCX.MEM,COF.SCX.NUC
Ace	ASSSSKNKTLQLIR	CG12883-PA	2	15	M	C	COF.SCX.CYT
Ace	ASSTGLLVVSNIKHLGKSLR	CG10575-PA	2	21	M	A	COF.SAX.CYT
Ace	ASSTSVIPTTVNPDLQKER	CG9707-PA	2	20	M	D	COF.SCX.MEM,COF.SCX.NUC
Ace	ASSVILAGLSVAAVGFAGK	CG7394-PA	2	20	M	H	SG.KcGel
Ace	ASTSNLLDVVR	CG6755-PA	2	12	M	H	COF.SCX.MEM,COF.SCX.NUC
Ace	ATAANTATAAGAAK	CG7008-PA	2	15	M	D	SG.KcC,SG.KcM
Ace	ATAEAQIGVNR	CG6476-PA	2	12	M	N	SG.KcM,COF.SAX.CYT,COF.SCX.CYT,COF.SCX.MEM,COF.SCX.NUC	CG6476-PB	2	12	M	N
Ace	ATAEKVAQNDYTIGLVDPVKDYQKLIETR	CG4930-PA	15	43	M	V	COF.SCX.CYT
Ace	ATATSVQNDVEAGVDEQLPR	CG4289-PA	15	34	M	E	COF.SCX.MEM
Ace	ATAVPHCPPKQDLPPPGGYK	CG3446-PA	2	21	M	K	SG.chr
Ace	ATEIDDLIEKLK	CG3572-PB	2	13	M	T	SG.KcNR
Ace	ATFTQDEIDFLR	CG3365-PA	2	13	M	S	COF.SCX.MEM,COF.SCX.NUC	CG3365-PB	72	83	M	S	CG3365-PC	2	13	M	S
Ace	ATGGGGSGHGGAGSAGNADHHKR	CG14411-PA	2	24	M	N	COF.SAX.CYT	CG14411-PB	2	24	M	N
Ace	ATIDGRPAQYGISLK	CG2165-PA	2	16	M	Q	SG.Golgi,SG.KcM,SG.Mito	CG2165-PB	2	16	M	Q
Ace	ATKTNTIER	CG12107-PA	2	10	M	N	COF.SCX.MEM,COF.SCX.NUC
Ace	ATLLSNGQQSVMASTSNGQEQQR	CG30118-PA	2	24	M	H	COF.SCX.CYT
Ace	ATNLQKATLEEIR	CG2201-PA	2	14	M	H	COF.SCX.CYT,COF.SCX.MEM
Ace	ATPQVKDLVLR	CG10272-PA	2	12	M	S	COF.SCX.MEM	CG10272-PB	2	12	M	S	CG10272-PC	2	12	M	S	CG10272-PD	2	12	M	S
Ace	ATQVKQFLNGYKDDVSKSLR	CG8331-PA	2	21	M	D	COF.SAX.CYT,COF.SCX.CYT,COF.SCX.MEM,COF.SCX.NUC
Ace	ATSEISSSNER	CG13001-PA	2	12	M	H	COF.SAX.CYT
Ace	ATSSHLNWLIIR	CG12740-PA	2	13	M	N	SG.KcGel,SG.KcM,SG.KcNR,SG.Mito,SG.extract,COF.SAX.CYT	CG12740-PB	2	13	M	N	CG12740-PC	2	13	M	N	CG12740-PD	2	13	M	N
Ace	ATSSILAKSTINSTSPPATPSSSASPGSTLTTR	CG1049-PA	2	34	M	K	COF.SCX.CYT	CG1049-PB	2	34	M	K	CG1049-PC	2	34	M	K	CG1049-PD	2	34	M	K
Ace	ATSSQLLPNGNLSR	CG5876-PA	2	15	M	N	COF.SCX.MEM,COF.SCX.NUC
Ace	ATTAAGIQQQQVIGLGAAYDR	CG15926-PA	2	22	M	Q	COF.SCX.MEM,COF.SCX.NUC
Ace	ATTTTTTTTTGATNAKDGVTMR	CG10579-PD	2	23	M	E	COF.SCX.MEM,COF.SCX.NUC	CG10579-PE	2	23	M	E
Ace	ATVAECNHSVLDLVTK	CG5688-PA	2	17	M	M	SG.chr
Ace	ATYEEVKDIPNHPEK	CG12279-PA	2	16	M	Y	SG.KcC
Ace	AVLPPDPVFSLR	CG13192-PA	2	13	M	S	COF.SAX.CYT,COF.SCX.CYT
Ace	AVNVYSTNVTSENLSR	CG3265-PA	2	17	M	H	COF.SAX.CYT,COF.SCX.CYT,COF.SCX.MEM,COF.SCX.NUC	CG3265-PB	2	17	M	H	CG3265-PC	2	17	M	H	CG3265-PD	2	17	M	H	CG3265-PE	2	17	M	H	CG40354-PB	2	17	M	H
Ace	AVSFEKNR	CG10083-PA	2	9	M	A	COF.SCX.CYT,COF.SCX.NUC
Ace	AYNHDGMPDQQFLWDVFQR	CG40410-PA	2	20	M	V	SG.KcNR
Ace	CDGDVAIAELESR	CG7857-PA	2	14	M	L	COF.SAX.CYT,COF.SCX.CYT,COF.SCX.MEM,COF.SCX.NUC
Ace	CDGEIGDPVTQPR	CG32380-PA	2	14	M	S	COF.SCX.MEM
Ace	CDYKVSER	CG3501-PA	2	9	M	A	COF.SCX.MEM,COF.SCX.NUC
Ace	CEKVTAR	CG11882-PA	2	8	M	C	COF.SCX.CYT
Ace	CESVTPADQR	CG14434-PA	2	11	M	N	COF.SAX.CYT,COF.SCX.CYT
Ace	CQSGGQMLCEIK	CG8073-PA	2	13	M	N	SG.extract,COF.SCX.CYT	CG8073-PB	2	13	M	N
Ace	GAREDEYDYLFK	CG5771-PA	2	13	M	V	SG.Golgi,SG.KcM,SG.KcNR,SG.Mito,SG.chr	CG5771-PB	2	13	M	V
Ace	GDFDLNVDSLIQR	CG2096-PA	2	14	M	L	SCX.CYT,COF.SCX.MEM,COF.SCX.NUC	CG2096-PB	2	14	M	L
Ace	GDQQQLILATGGYDHTIK	CG3004-PA	2	19	M	V	SG.extract,SG.chr
Ace	GDQQQSAATGNAYQSGSSSVAFVTTPDR	CG11590-PA	73	100	M	E	COF.SCX.CYT
Ace	GDSLENPDTSVDPIVNLSIANYDAFANYLR	CG7507-PA	2	31	M	K	COF.SCX.CYT	CG7507-PB	2	31	M	K
Ace	GDVMNIDSIISR	CG5650-PA	2	13	M	L	COF.SCX.CYT,COF.SCX.MEM,COF.SCX.NUC
Ace	GDVTGLSNAQADELCQKPDSSTK	CG1707-PA	2	24	M	D	SG.KcC,SG.KcN,SG.KcNR,SG.chr
Ace	GDYDSDDEKSQVEK	CG4140-PA	2	15	M	L	SG.KcC,SG.chr,COF.SCX.CYT
Ace	GEPTSSLVLPVILR	CG5073-PA	4	17	M	P	COF.SCX.CYT
Ace	GEQGEETGQKLTER	CG8237-PA	2	15	M	S	COF.SCX.MEM,COF.SCX.NUC
Ace	GESTQALNVNQR	CG17019-PA	383	394	M	P	COF.SCX.NUC
Ace	GEVKPAKVENYSTGTDANTLFVDGER	CG6363-PA	2	27	M	V	COF.SCX.NUC
Ace	GKDFDAVGFVK	CG16944-PA	2	12	M	D	SG.Golgi,SG.KcM,SG.KcNR,SG.extract,SG.chr	CG16944-PB	2	12	M	D	CG16944-PC	15	25	M	D	CG16944-PD	15	25	M	D
Ace	GNVFANLFKGLFGKK	CG8385-PA	2	16	M	E	SG.KcC	CG8385-PB	2	16	M	E	CG8385-PC	2	16	M	E	CG8385-PD	2	16	M	E	CG8385-PE	2	16	M	E
Ace	GSALENYVNQVR	CG18332-PA	2	13	M	T	COF.SCX.CYT,COF.SCX.MEM,COF.SCX.NUC
Ace	GTEEELMFR	CG17565-PA	2	10	M	N	COF.SCX.CYT
Ace	MAPPSYSDLGKQAR	CG6647-PA	1	14	-	D	COF.SCX.NUC	CG6647-PB	1	14	-	D
Ace	MDADKQLER	CG3312-PA	1	9	-	Q	COF.SAX.CYT,COF.SCX.CYT,COF.SCX.MEM,COF.SCX.NUC	CG3312-PB	1	9	-	Q
Ace	MDAEDGFDPTLLKK	CG4153-PA	1	14	-	K	SG.extract
Ace	MDAEKMLEIDGSYLEGGGQALR	CG4061-PA	1	22	-	N	COF.SCX.NUC
Ace	MDAGTKILVVGDVR	CG7741-PA	22	35	T	G	COF.SCX.MEM,COF.SCX.NUC
Ace	MDALQDEVESLEAILMDDVCIKR	CG13344-PA	1	23	-	T	COF.SCX.CYT
Ace	MDANKAAETAAKENAADK	CG5935-PA	1	18	-	V	SG.KcC
Ace	MDAPAEGHVDPESCNEIEDEK	CG5330-PA	1	21	-	S	SG.chr
Ace	MDASNSVESR	CG9373-PA	3	12	S	E	COF.SCX.MEM
Ace	MDATASSKFSDVDEYGFKR	CG5916-PA	1	19	-	G	COF.SCX.NUC
Ace	MDATNNGESADQVGIR	CG7788-PA	1	16	-	V	COF.SAX.CYT,COF.SCX.CYT,COF.SCX.MEM,COF.SCX.NUC
Ace	MDATQSQQPSPQSVGR	CG9412-PA	3	18	V	E	COF.SCX.MEM,COF.SCX.NUC	CG9412-PB	3	18	V	E	CG9412-PC	3	18	V	E	CG9412-PD	3	18	V	E	CG9412-PE	3	18	V	E
Ace	MDATSIITQVSR	CG5830-PA	1	12	-	D	SG.KcNR,COF.SCX.MEM,COF.SCX.NUC
Ace	MDDATSQNSAATPMTR	CG31729-PA	1	16	-	E	COF.SCX.MEM,COF.SCX.NUC
Ace	MDDDQQFCLR	CG12052-PA	1	10	-	W	COF.SCX.CYT,COF.SCX.MEM	CG12052-PB	1	10	-	W	CG12052-PC	1	10	-	W	CG12052-PD	1	10	-	W	CG12052-PE	1	10	-	W	CG12052-PF	1	10	-	W	CG12052-PG	1	10	-	W	CG12052-PH	1	10	-	W	CG12052-PI	1	10	-	W	CG12052-PJ	1
Ace	MDDEVIEISDSER	CG4599-PA	1	13	-	E	COF.SCX.CYT
Ace	MDDIALDAAKKTAAR	CG30410-PA	40	54	M	T	COF.SAX.CYT,COF.SCX.CYT,COF.SCX.NUC
Ace	MDDLNPLAGTAHLLEEVDK	CG4279-PA	1	19	-	K	SG.KcC,SG.chr
Ace	MDDLSQGDICR	CG1317-PB	1	11	-	V	COF.SCX.MEM,COF.SCX.NUC
Ace	MDDRNEIPQDGPASMEPEGVIESTWHEVYDNFDDMNLR	CG9075-PA	1	38	-	E	SG.KcNR	CG9075-PB	1	38	-	E	CG9075-PC	1	38	-	E	CG9075-PD	1	38	-	E
Ace	MDDSREESQFIVDDVSK	CG12363-PA	1	17	-	T	SG.KcC,SG.chr
Ace	MDEANIQDKER	CG11987-PA	1	11	-	F	COF.SAX.CYT,COF.SCX.MEM
Ace	MDEDDNLSNADISIDDEEVVR	CG1530-PA	1	21	-	E	COF.SCX.CYT
Ace	MDEDSATIQLGDR	CG9776-PA	1	13	-	R	COF.SCX.CYT
Ace	MDEIKLAKVENVR	CG3530-PB	1	13	-	M	COF.SAX.CYT,COF.SCX.CYT,COF.SCX.MEM,COF.SCX.NUC
Ace	MDEKLKYSLLR	CG15438-PA	1	11	-	G	COF.SCX.MEM,COF.SCX.NUC
Ace	MDELASLIR	CG9749-PA	13	21	I	T	COF.SCX.MEM,COF.SCX.NUC
Ace	MDELEKKIKNEVTR	CG9765-PA	1012	1025	D	S	COF.SCX.CYT,COF.SCX.MEM	CG9765-PB	976	989	D	S	CG9765-PC	1094	1107	D	S	CG9765-PD	1079	1092	D	S	CG9765-PE	31	44	D	S	CG9765-PF	31	44	D	S	CG9765-PG	31	44	D	S
Ace	MDELTYQTAVKKAQLVER	CG31800-PA	1	18	-	N	COF.SCX.CYT,COF.SCX.NUC
Ace	MDENSLIYGLELQAR	CG10646-PA	1	15	-	A	COF.SCX.MEM
Ace	MDFDNAKENIQPLASGR	CG7838-PA	1	17	-	N	COF.SAX.CYT,COF.SCX.MEM
Ace	MDFGDDFAAK	CG6948-PA	1	10	-	E	SG.KcM,SG.extract,COF.SCX.CYT,COF.SCX.NUC
Ace	MDFIDDFIEEYK	CG3163-PA	1	12	-	S	SG.extract
Ace	MDFKKLKKMEEAVR	CG32598-PA	1	14	-	I	COF.SCX.CYT,COF.SCX.MEM,COF.SCX.NUC	CG32601-PA	1	14	-	I
Ace	MDFLFGSR	CG13852-PA	1	8	-	S	COF.SCX.CYT
Ace	MDFPDKMDLENER	CG6488-PA	1	13	-	V	COF.SCX.CYT,COF.SCX.MEM
Ace	MDFVTTTGEGSFLR	CG15443-PA	6	19	Q	N	COF.SAX.CYT,COF.SCX.CYT,COF.SCX.NUC
Ace	MDFYYSPR	CG11512-PA	1	8	-	S	COF.SCX.CYT,COF.SCX.NUC	CG12242-PA	1	8	-	G
Ace	MDGAIAMNHVVESDKEKR	CG32368-PA	1	18	-	Q	COF.SAX.CYT
Ace	MDGNKDEAQR	CG3061-PA	1	10	-	C	COF.SCX.MEM
Ace	MDHEYVGVSPLGAADGK	CG3460-PA	1	17	-	G	SG.KcM,SG.chr
Ace	MDIDLSLDEIIER	CG6961-PA	1	13	-	K	COF.SCX.CYT,COF.SCX.MEM,COF.SCX.NUC	CG18259-PA	1	13	-	K
Ace	MDIELPYLAEYAR	CG40411-PC	1	13	-	T	COF.SCX.CYT	CG40411-PD	1	13	-	T	CG40411-PE	1	13	-	T
Ace	MDIFESFCR	CG15367-PA	1	9	-	T	COF.SAX.CYT
Ace	MDILKAEIAR	CG6011-PA	1	10	-	K	COF.SCX.MEM,COF.SCX.NUC
Ace	MDIPVLKTNGHER	CG6428-PA	1	13	-	L	COF.SAX.CYT
Ace	MDIQQLEVLCKQLYEATDIR	CG33180-PB	1	20	-	I	COF.SCX.CYT
Ace	MDISKAPNPR	CG33198-PA	1	10	-	K	COF.SCX.NUC
Ace	MDITQSFKASVMTVR	CG13626-PA	1	15	-	L	COF.SCX.MEM
Ace	MDKDAFTLQAIR	CG2023-PA	1	12	-	Q	COF.SCX.CYT,COF.SCX.MEM,COF.SCX.NUC
Ace	MDKLNENAR	CG33162-PA	1	9	-	Q	COF.SCX.MEM,COF.SCX.NUC
Ace	MDKLNSTLTAVKNLR	CG1245-PA	1	15	-	S	COF.SCX.MEM
Ace	MDKNLMMPKR	CG7583-PA	1	10	-	S	COF.SAX.CYT,COF.SCX.MEM,COF.SCX.NUC	CG7583-PB	1	10	-	S	CG7583-PC	1	10	-	S	CG7583-PD	1	10	-	S
Ace	MDKPVVWAR	CG2998-PA	1	9	-	V	COF.SAX.CYT
Ace	MDKVNELKEK	CG2720-PA	1	10	-	G	SG.KcC
Ace	MDKVVKFAEPGR	CG8860-PA	1	12	-	A	COF.SCX.MEM,COF.SCX.NUC	CG14214-PA	1	12	-	A
Ace	MDLMELLKQAQR	CG11092-PA	1	12	-	L	COF.SCX.CYT,COF.SCX.MEM,COF.SCX.NUC
Ace	MDLNTLLQR	CG7262-PA	1	9	-	A	COF.SCX.MEM
Ace	MDLQEFLSLER	CG7110-PB	1	11	-	Q	COF.SCX.CYT
Ace	MDLQHMENGLSGGGGGGLSEIDFQR	CG5081-PA	1	25	-	L	SG.KcM,SG.chr	CG5081-PB	1	25	-	L
Ace	MDLQQLEEQAR	CG5341-PA	1	11	-	Q	COF.SCX.CYT,COF.SCX.MEM,COF.SCX.NUC
Ace	MDLSPNNQIEDR	CG5134-PB	2	13	M	K	COF.SCX.CYT	CG5134-PC	2	13	M	K
Ace	MDLVDIDQVLDNLELSIAADEQLSR	CG15667-PA	1	25	-	N	COF.SCX.CYT	CG15667-PB	1	25	-	N
Ace	MDLYDGIDTR	CG17540-PA	1	10	-	A	COF.SCX.MEM
Ace	MDMDLEQLKNDFLPLIAGIK	CG5206-PA	1	20	-	Q	SG.chr
Ace	MDMITVGQSVKIKR	CG1453-PA	1	14	-	T	COF.SCX.NUC	CG1453-PB	1	14	-	T	CG1453-PC	1	14	-	T	CG1453-PD	1	14	-	T	CG1453-PE	1	14	-	T
Ace	MDMPYNTSPSLR	CG3400-PA	1	12	-	V	COF.SCX.MEM	CG3400-PB	181	192	I	V	CG3400-PD	1	12	-	V	CG3400-PE	1	12	-	V	CG3400-PF	1	12	-	V	CG3400-PG	181	192	I	V	CG3400-PH	1	12	-	V	CG3400-PI	1	12	-	V
Ace	MDNKSAVSALQEFCAR	CG7138-PA	1	16	-	T	COF.SCX.NUC
Ace	MDNKSEKVTVNKEELR	CG6584-PA	1	16	-	K	COF.SAX.CYT,COF.SCX.CYT,COF.SCX.NUC	CG6584-PB	1	16	-	K	CG6584-PC	43	58	T	K	CG6584-PD	1	16	-	K	CG6584-PE	43	58	T	K	CG6584-PF	1	16	-	K
Ace	MDNSALMPQASGR	CG4287-PA	1	13	-	H	COF.SCX.NUC
Ace	MDNSGNNRYELLFMDDDDSSGLAQPQIAAVVAAPK	CG11844-PA	1	35	-	K	SG.KcGel	CG11844-PB	32	66	I	K	CG11844-PC	1	35	-	K
Ace	MDNTSTSDIVIINGNSHPDLANMVAER	CG2246-PA	21	47	D	M	SG.chr	CG2246-PB	21	47	D	M	CG2246-PC	1	27	-	M	CG2246-PD	1	27	-	M	CG2246-PE	1	27	-	M	CG2246-PF	1	27	-	M
Ace	MDNTWVHSSPYSPLPPYAVIGGHDSDR	CG3884-PB	1	27	-	T	SG.extract
Ace	MDPDDDLVLENEAEEIER	CG11755-PA	1	18	-	L	COF.SCX.CYT
Ace	MDPFTQHMLEK	CG2092-PA	1	11	-	A	SG.KcM	CG2092-PB	1	11	-	A
Ace	MDPQKITELANLLR	CG9044-PA	1	14	-	Q	COF.SCX.MEM,COF.SCX.NUC
Ace	MDPTPPLR	CG2147-PA	1	8	-	A	COF.SAX.CYT,COF.SCX.CYT
Ace	MDQLVQLNNQAGGR	CG8315-PA	1	14	-	D	COF.SCX.MEM,COF.SCX.NUC
Ace	MDQPDDHFR	CG5373-PA	1	9	-	Y	COF.SAX.CYT
Ace	MDSATNLLEQQGSAADVSGGSHPAEVEVTTQAR	CG5315-PA	1	33	-	A	SG.KcM,SG.chr	CG5315-PC	1	33	-	A
Ace	MDSDLKAKVESCAR	CG12752-PA	1	14	-	T	COF.SCX.MEM,COF.SCX.NUC
Ace	MDSEAAGVALLSR	CG13951-PA	1	13	-	E	COF.SCX.CYT,COF.SCX.MEM,COF.SCX.NUC
Ace	MDSEFLELTQLLPR	CG13902-PA	1	14	-	W	COF.SCX.CYT
Ace	MDSIFLVDTTGR	CG1142-PA	1	12	-	Q	COF.SCX.MEM,COF.SCX.NUC
Ace	MDSKEVSEVPR	CG12298-PA	1	11	-	R	COF.SCX.CYT
Ace	MDSKLDMFEDVNTSPSLEGDMSIPGKR	CG3652-PA	1	27	-	T	SG.KcNR
Ace	MDSLITIVNKLQDAFTSLGVHMQLDLPQIAVVGGQSAGK	CG18102-PA	1	39	-	S	SG.Mito	CG18102-PB	1	39	-	S	CG18102-PC	1	39	-	S	CG18102-PD	1	39	-	S	CG18102-PE	1	39	-	S	CG18102-PF	1	39	-	S	CG18102-PG	1	39	-	S
Ace	MDSNDSGTADANSAR	CG5385-PA	1	15	-	Q	COF.SCX.MEM
Ace	MDSPLNDGSHHPPPHAPHPLADYQFSAEEVK	CG13533-PA	1	31	-	A	SG.chr
Ace	MDTDDNSSGTITGSDLGQR	CG11309-PA	1	19	-	Y	COF.SCX.MEM	CG11309-PB	1	19	-	Y
Ace	MDTEKSSSSSFEDLTNAEDTKDIR	CG5482-PA	1	24	-	K	COF.SCX.CYT,COF.SCX.MEM
Ace	MDTFDVSDR	CG1587-PA	1	9	-	N	COF.SAX.CYT,COF.SCX.CYT,COF.SCX.NUC	CG1587-PB	1	9	-	N	CG1587-PC	1	9	-	N
Ace	MDTLSEAVANGTATAATR	CG3573-PA	1	18	-	T	COF.SCX.CYT,COF.SCX.MEM,COF.SCX.NUC
Ace	MDTSETAVELTEAENELYDR	CG12276-PA	5	24	D	Q	COF.SCX.CYT
Ace	MDTSKISAR	CG32016-PB	1	9	-	Y	COF.SCX.MEM	CG32016-PC	1	9	-	Y
Ace	MDTSMPNQPKFLPR	CG3093-PA	1	14	-	I	COF.SCX.NUC
Ace	MDTYLFDGGR	CG1100-PA	1	10	-	I	COF.SAX.CYT,COF.SCX.CYT,COF.SCX.MEM,COF.SCX.NUC
Ace	MDVADAQVGQLR	CG4039-PA	1	12	-	V	COF.SAX.CYT,COF.SCX.CYT,COF.SCX.MEM,COF.SCX.NUC
Ace	MDVAKLEKMKVVDLR	CG30122-PB	1	15	-	N	COF.SAX.CYT,COF.SCX.CYT,COF.SCX.NUC
Ace	MDVDFGAQAGQSYR	CG30085-PA	1	14	-	T	COF.SCX.MEM
Ace	MDVDLLPLR	CG10489-PA	1	9	-	K	COF.SCX.CYT,COF.SCX.MEM
Ace	MDVEKDKLR	CG4043-PA	7	15	K	Q	COF.SAX.CYT,COF.SCX.CYT,COF.SCX.MEM
Ace	MDVETQEIR	CG33130-PA	1	9	-	Q	COF.SAX.CYT,COF.SCX.CYT,COF.SCX.NUC	CG33130-PB	1	9	-	Q	CG33130-PC	1	9	-	Q
Ace	MDVFLMIR	CG4204-PA	1	8	-	R	COF.SCX.CYT,COF.SCX.NUC
Ace	MDVKELQPPSSVR	CG32281-PA	24	36	N	G	COF.SAX.CYT,COF.SCX.CYT
Ace	MDVLEMLR	CG2212-PA	1	8	-	A	COF.SCX.MEM
Ace	MDVMSSSLQQQR	CG8261-PA	1	12	-	V	SG.Golgi,COF.SCX.MEM,COF.SCX.NUC	CG8261-PB	1	12	-	V	CG8261-PC	1	12	-	V	CG8261-PD	1	12	-	V	CG8261-PE	1	12	-	V
Ace	MDVSASTSFESSPDKR	CG12360-PA	1	16	-	N	COF.SCX.MEM,COF.SCX.NUC	CG12360-PB	1	16	-	N
Ace	MDVSLTEPETR	CG6192-PA	1	11	-	F	COF.SAX.CYT,COF.SCX.CYT,COF.SCX.MEM,COF.SCX.NUC
Ace	MDVYDVSDDLIKK	CG8378-PA	1	13	-	L	SG.chr
Ace	MEAAILDIINGILAIDTER	CG32164-PA	1	19	-	I	COF.SCX.CYT
Ace	MEADITPLAETNGEQR	CG12391-PA	1	16	-	Q	COF.SAX.CYT,COF.SCX.CYT,COF.SCX.MEM,COF.SCX.NUC
Ace	MEAENIR	CG11738-PA	1	7	-	A	COF.SCX.MEM
Ace	MEAEVASFVEHELNDVDLK	CG9870-PA	1	19	-	S	SG.chr
Ace	MEALDILEKR	CG9893-PA	1	10	-	I	COF.SCX.CYT,COF.SCX.MEM,COF.SCX.NUC
Ace	MEALGDLLAPHSELIAK	CG7272-PA	1	17	-	V	SG.KcM,SG.chr
Ace	MEAQKLTELLR	CG7935-PA	1	11	-	A	COF.SAX.CYT,COF.SCX.CYT,COF.SCX.MEM,COF.SCX.NUC
Ace	MEATDQEVMLEGR	CG31531-PA	1	13	-	E	COF.SAX.CYT,COF.SCX.CYT	CG31531-PB	1	13	-	E	CG31531-PC	1	13	-	E
Ace	MEATTTTTPDLNR	CG8201-PC	1	13	-	G	COF.SCX.NUC	CG8201-PD	1	13	-	G	CG8201-PE	1	13	-	G	CG8201-PF	1	13	-	G	CG8201-PG	1	13	-	G
Ace	MEDAEQADEEDEEEEEAAPSVSSK	CG10223-PA	1078	1101	K	A	SG.KcM,SG.chr
Ace	MEDEDDPVVEEIPVFLSKNLR	CG10582-PA	1	21	-	D	COF.SCX.CYT
Ace	MEDHNTANLSEPASPANSVASAEIAAEFAALSVEEK	CG5174-PA	1	36	-	E	SG.KcNR,SG.chr	CG5174-PG	1	36	-	E	CG5174-PH	1	36	-	E	CG5174-PJ	1	36	-	E	CG5174-PK	1	36	-	E
Ace	MEDIEYLDEYKDLVLPGIK	CG12864-PA	1	19	-	S	SG.chr	CG12864-PB	1	19	-	S
Ace	MEDIFHWCR	CG10504-PA	1	9	-	E	SG.extract
Ace	MEDILGVLGSLSDLR	CG12165-PA	1	15	-	R	SG.extract,COF.SCX.CYT
Ace	MEDLLVEVR	CG6203-PA	1	9	-	L	COF.SAX.CYT,COF.SCX.CYT,COF.SCX.MEM,COF.SCX.NUC	CG6203-PB	1	9	-	L	CG6203-PC	1	9	-	L	CG6203-PD	1	9	-	L
Ace	MEDQSNAAPAVAAENGGNTAQEVSSTTQPIEPTKR	CG14648-PA	1	35	-	S	SG.Golgi,SG.KcC,SG.KcM,SG.chr,COF.SCX.MEM
Ace	MEDSEAAFKR	CG13434-PA	1	10	-	H	COF.SAX.CYT
Ace	MEDSQMDTSSPTESSSEVNFTAEEDKSQETR	CG6677-PC	1	31	-	S	SG.chr
Ace	MEDVEIKPR	CG6493-PA	1	9	-	G	COF.SCX.CYT,COF.SCX.MEM,COF.SCX.NUC
Ace	MEDVPVKIVER	CG10435-PA	1	11	-	Y	COF.SCX.CYT,COF.SCX.MEM,COF.SCX.NUC
Ace	MEEFNSSGSVVNGTGSTEVPQSNAEVIR	CG12559-PB	1	28	-	G	COF.SCX.CYT,COF.SCX.MEM	CG12559-PC	1	28	-	G	CG12559-PD	1	28	-	G
Ace	MEESHDFQFVLPLNASDLINSSGDQYYVK	CG1911-PA	1	29	-	E	SG.chr
Ace	MEEVAVKK	CG9745-PA	1	8	-	R	SG.KcGel,COF.SAX.CYT,COF.SCX.CYT,COF.SCX.NUC	CG9745-PB	1	8	-	R	CG9745-PC	1	8	-	R
Ace	MEFDDAENGLGMGFGGR	CG9765-PA	1	17	-	G	COF.SCX.CYT,COF.SCX.NUC	CG9765-PB	1	17	-	G
Ace	MEGSDFVDPAFSSGER	CG1710-PA	1	16	-	I	COF.SCX.MEM,COF.SCX.NUC	CG1710-PB	1	16	-	I	CG1710-PC	1	16	-	I	CG1710-PD	1	16	-	I
Ace	MEHDDSSTSGTGSHTASNTSLVPASLKR	CG4898-PC	1	28	-	R	SG.KcC	CG4898-PE	226	253	D	R	CG4898-PH	238	265	D	R	CG4898-PI	1	28	-	R
Ace	MEHEVAVSGGDSSLEEITGSSK	CG9890-PA	1	22	-	L	SG.chr
Ace	MEHHEDNAQLDNYLQNR	CG1483-PA	1	17	-	L	SG.KcC,SG.KcM,COF.SAX.CYT	CG1483-PB	1	17	-	L
Ace	MEIGNDQSYQDFFDKLR	CG3342-PA	1	17	-	S	COF.SCX.NUC
Ace	MEIPDTYYSKDEYVETASGNK	CG10846-PA	1	21	-	V	SG.chr
Ace	MEIPIQVAVR	CG1708-PA	1	10	-	I	COF.SCX.CYT,COF.SCX.MEM,COF.SCX.NUC
Ace	MEKFDLPKR	CG6950-PA	34	42	K	L	COF.SAX.CYT,COF.SCX.MEM,COF.SCX.NUC	CG6950-PB	34	42	K	L	CG6950-PC	34	42	K	L	CG6950-PD	34	42	K	L
Ace	MEKFPLKGSR	CG5284-PA	1	10	-	E	COF.SCX.MEM,COF.SCX.NUC
Ace	MEKIEAER	CG3767-PA	1	8	-	Q	COF.SAX.CYT,COF.SCX.CYT,COF.SCX.MEM
Ace	MEKLEALKISSMR	CG10153-PA	1	13	-	P	COF.SCX.CYT
Ace	MEKLSKAKKVAR	CG5886-PA	1	12	-	E	COF.SCX.MEM,COF.SCX.NUC
Ace	MEKNKYVPR	CG7081-PA	1	9	-	V	COF.SCX.MEM
Ace	MEKSCSIGNGR	CG18343-PA	1	11	-	E	COF.SCX.NUC
Ace	MEKTKTAAEKLAER	CG12343-PA	1	14	-	K	COF.SCX.NUC
Ace	MELEILNAKNSKPYGKVKVPSGATPIGDLR	CG10849-PA	1	30	-	A	COF.SCX.MEM
Ace	MELGKKLR	CG13472-PA	1	8	-	E	COF.SCX.MEM,COF.SCX.NUC
Ace	MELNIDNRPNDVGVLAPNDQENEDANR	CG11120-PA	1	27	-	R	SG.KcGel,SG.chr
Ace	MELPSTPDELAAQQADSAALKDLLKDPSR	CG3430-PA	5	33	A	W	COF.SCX.CYT
Ace	MEMLPNQTIYINNLNEK	CG4528-PA	1	17	-	I	SG.KcGel
Ace	MEMMHGASLLSR	CG7519-PA	1	12	-	P	COF.SAX.CYT
Ace	MEMSAAMFAR	CG10371-PB	1	10	-	V	COF.SCX.NUC
Ace	MEMSLNPVR	CG7033-PA	1	9	-	V	SG.extract,COF.SAX.CYT,COF.SCX.CYT,COF.SCX.MEM,COF.SCX.NUC
Ace	MENDAGENVDLYVPR	CG2986-PA	1	15	-	K	SG.KcGel,SG.extract,COF.SAX.CYT,COF.SCX.CYT,COF.SCX.MEM,COF.SCX.NUC	CG2986-PB	1	15	-	K	CG2986-PC	1	15	-	K	CG2986-PD	1	15	-	K
Ace	MENFTPKEVKILETVEDIQER	CG1977-PA	1	21	-	R	COF.SCX.CYT,COF.SCX.MEM
Ace	MENLNFAR	CG2747-PA	1	8	-	T	COF.SCX.MEM
Ace	MENNEAPSPSGSNNNDFPILPPPPNANDNYNQFGDHQIR	CG12210-PB	1	39	-	N	SG.KcM,SG.Mito,SG.chr
Ace	MENNEAPSPSGSNNNENNNAAQK	CG12210-PA	1	23	-	K	SG.KcM,SG.chr
Ace	MENPNCDLYTLEANMASQALR	CG10126-PA	1	21	-	E	COF.SCX.NUC
Ace	MENSDEIMQILER	CG2890-PA	4	16	T	F	COF.SCX.CYT,COF.SCX.NUC	CG2890-PB	4	16	T	F	CG2890-PC	4	16	T	F
Ace	MENTRGGENNVELANGGKESTGNVR	CG10600-PA	1	25	-	K	SG.KcC
Ace	MEPFTHNDGNRDELIIQQK	CG4968-PA	1	19	-	R	SG.KcC
Ace	MEPGILIDER	CG31175-PA	1	10	-	Q	COF.SCX.CYT,COF.SCX.MEM	CG31175-PC	1	10	-	Q
Ace	MEPHQDSPVYANYEDMR	CG7635-PA	1	17	-	N	SG.Golgi,SG.KcM
Ace	MEPIDIAR	CG7212-PA	1	8	-	L	COF.SCX.CYT
Ace	MEPISHLVK	CG1458-PA	1	9	-	S	SG.KcM,SG.chr
Ace	MEPMNLGSPVNSPGSNQTQYLPPFLLGDPQGITPHK	CG6540-PA	1	36	-	N	SG.chr
Ace	MEPNDEVVER	CG10874-PA	1	10	-	Q	COF.SAX.CYT,COF.SCX.CYT	CG10874-PB	1	10	-	Q
Ace	MEPPAAGNLLEIMDLAR	CG1657-PA	1	17	-	T	COF.SCX.CYT,COF.SCX.MEM
Ace	MEPSACEDLKAFER	CG8009-PA	1	14	-	R	COF.SCX.MEM,COF.SCX.NUC	CG8009-PB	1	14	-	R
Ace	MEPTNSESR	CG2611-PA	1	9	-	H	COF.SCX.MEM
Ace	MEQCYNR	CG6198-PA	1	7	-	G	COF.SCX.CYT
Ace	MEQLFQNYR	CG10228-PA	1	9	-	D	COF.SCX.CYT,COF.SCX.NUC
Ace	MEQMEVDVDMSAKPSTSSSAAAGSSMAVDK	CG6932-PA	1	30	-	T	SG.chr
Ace	MEQQLEKVLAEIAAR	CG14812-PA	1	15	-	Q	COF.SCX.CYT,COF.SCX.MEM,COF.SCX.NUC
Ace	MEQTPITDAEKVR	CG10540-PA	1	13	-	I	COF.SAX.CYT,COF.SCX.CYT,COF.SCX.MEM,COF.SCX.NUC
Ace	MESADALVEEQKLMAEAKYR	CG15099-PA	1	20	-	T	COF.SCX.CYT,COF.SCX.MEM,COF.SCX.NUC
Ace	MESEGSSSEDIGR	CG9216-PA	1019	1031	K	T	COF.SAX.CYT,COF.SCX.MEM,COF.SCX.NUC	CG9216-PB	1	13	-	T	CG9216-PC	1019	1031	K	T
Ace	MESESFYGVTLSEKEAIAQFEVPDVPEEYIVHSHK	CG7911-PA	1	35	-	L	SG.KcC
Ace	MESISTTGR	CG8578-PA	1	9	-	R	COF.SCX.CYT
Ace	MESMEYEMAR	CG4051-PA	1	10	-	N	COF.SAX.CYT
Ace	MESPVVNEVAASLGGEKLEVFR	CG12265-PA	1	22	-	K	COF.SCX.CYT
Ace	MESSKLLR	CG6187-PA	1	8	-	N	COF.SCX.CYT
Ace	MESVFEAYLGPDSVLASAVGQAVGSGEPEDIPR	CG4428-PA	13	45	I	R	COF.SCX.CYT
Ace	METEHLKR	CG15797-PA	1	8	-	L	COF.SAX.CYT
Ace	METESLNR	CG1607-PA	1	8	-	K	COF.SCX.MEM	CG1607-PB	1	8	-	K
Ace	METGPNAEIELLER	CG8858-PA	1	14	-	V	COF.SCX.CYT,COF.SCX.MEM,COF.SCX.NUC
Ace	METKEKDFKR	CG18251-PA	1	10	-	A	COF.SCX.MEM	CG18251-PB	7329	7338	T	A	CG18251-PC	7094	7103	T	A	CG18251-PD	1	10	-	A
Ace	METLLEQQR	CG2925-PA	1	9	-	R	COF.SCX.CYT,COF.SCX.MEM,COF.SCX.NUC
Ace	METLLGIKGPDFVMLAADTTHAR	CG17331-PA	1	23	-	S	SG.KcC
Ace	METNVDFSSISSKLYR	CG2213-PA	1	16	-	K	COF.SCX.CYT,COF.SCX.NUC
Ace	METPMADDLLQFR	CG4645-PA	1	13	-	D	COF.SCX.CYT,COF.SCX.MEM,COF.SCX.NUC
Ace	METPVEEHGMDLTK	CG31329-PA	1	14	-	V	SG.chr
Ace	METPYTDHLSPEDFEHVYEPAEDSFLLLDALEK	CG32951-PB	1	33	-	D	SG.chr
Ace	METQPEVPEVPLRPFK	CG6711-PA	1	16	-	L	SG.chr
Ace	METSSSSPVKPR	CG31120-PA	1	12	-	R	COF.SCX.CYT,COF.SCX.MEM,COF.SCX.NUC	CG31120-PB	1	12	-	R
Ace	MEVDEDGYEVPSSSSKGDKK	CG16982-PA	1	20	-	R	SG.KcC
Ace	MEVDEEKPQIIAENPNENVIR	CG6388-PA	1	21	-	E	SG.KcC,SG.chr,COF.SAX.CYT,COF.SCX.CYT,COF.SCX.MEM,COF.SCX.NUC
Ace	MEVEFSR	CG6353-PA	1	7	-	E	COF.SCX.MEM
Ace	MEVEQTSVR	CG11926-PA	1	9	-	S	COF.SCX.CYT,COF.SCX.NUC
Ace	MEVESNNKR	CG10990-PA	1	9	-	A	COF.SAX.CYT,COF.SCX.CYT,COF.SCX.MEM,COF.SCX.NUC
Ace	MEVFTFEKSYLER	CG10722-PA	1	13	-	L	COF.SCX.CYT	CG10722-PB	1	13	-	L
Ace	MEVNVSKLR	CG13185-PA	1	9	-	L	COF.SAX.CYT,COF.SCX.MEM
Ace	MEVTEANLQLLAGYLQQTLSADPNVRRPAEK	CG13281-PA	1	31	-	L	SG.KcNR
Ace	MEYESVLIVKPEVFIYK	CG9132-PB	1	17	-	I	SG.Golgi,SG.KcC,SG.chr
Ace	MEYKPVPTVKDAAPFDASQDAQVLR	CG9579-PA	1	25	-	A	SG.KcC,COF.SAX.CYT,COF.SCX.CYT,COF.SCX.MEM,COF.SCX.NUC
Ace	MFAGAYAPNAGGVQQHTGGGYYGNGAAAGAGGSGNGAPR	CG10777-PB	1	39	-	H	SG.chr
Ace	MFASVELSSYR	CG12357-PA	1	11	-	D	COF.SCX.CYT,COF.SCX.MEM,COF.SCX.NUC
Ace	MFDVEPIIADHK	CG8722-PA	1	12	-	D	SG.chr	CG8722-PB	1	12	-	D	CG8722-PC	1	12	-	D
Ace	MFGATQSTNR	CG9862-PA	1	10	-	M	COF.SAX.CYT,COF.SCX.CYT,COF.SCX.MEM,COF.SCX.NUC
Ace	MFGFDGEYR	CG3356-PA	1	9	-	R	COF.SCX.CYT
Ace	MFGGQQPILVLSQNTKR	CG8977-PA	1	17	-	E	COF.SAX.CYT,COF.SCX.CYT,COF.SCX.MEM,COF.SCX.NUC	CG8977-PB	1	17	-	E
Ace	MFKLLSSSFKR	CG4276-PA	1	11	-	R	COF.SCX.MEM,COF.SCX.NUC
Ace	MFNNIFGKKPTVKEQQR	CG4618-PA	1	17	-	E	COF.SAX.CYT,COF.SCX.CYT
Ace	MFNVLQR	CG6718-PA	1	7	-	L	COF.SAX.CYT,COF.SCX.CYT,COF.SCX.MEM,COF.SCX.NUC
Ace	MFQVLPR	CG12576-PA	1	7	-	P	COF.SAX.CYT
Ace	MFSFLKR	CG6148-PB	1	7	-	E	COF.SAX.CYT,COF.SCX.MEM,COF.SCX.NUC
Ace	MFSIFGKR	CG32918-PA	1	8	-	K	COF.SCX.CYT,COF.SCX.MEM
Ace	MFSNFKER	CG17598-PA	1	8	-	I	COF.SAX.CYT,COF.SCX.MEM,COF.SCX.NUC
Ace	MFVPETEDMLPR	CG8262-PA	1	12	-	L	COF.SCX.CYT,COF.SCX.NUC
Ace	MGHAGAIISGGK	CG1065-PA	279	290	R	G	SG.chr	CG6255-PA	280	291	R	G
Ace	MGINHLADLTPEEFAQR	CG10460-PA	55	71	K	C	SG.KcGel
Ace	MGQVVEADILGDEWKGYQLR	CG10944-PA	1	20	-	I	SG.KcC	CG10944-PB	32	51	R	I	CG10944-PC	35	54	R	I
Ace	MGVQVLINDPDKLEAIR	CG5374-PA	251	267	K	A	SG.KcC,SG.KcNR,SG.chr	CG5374-PB	251	267	K	A
Ace	MGYIFHETFGR	CG3210-PA	365	375	R	T	SG.KcC
Ace	MHSLGASKVVATLR	CG32343-PA	1	14	-	A	COF.SAX.CYT
Ace	MIAMDEQR	CG9291-PA	1	8	-	G	COF.SCX.CYT,COF.SCX.NUC	CG9291-PB	1	8	-	G
Ace	MIAVAEPPLEFVPR	CG9198-PA	1	14	-	G	COF.SCX.CYT,COF.SCX.NUC
Ace	MIHVGENTWNLR	CG14991-PA	1	12	-	I	SG.chr	CG14991-PB	1	12	-	I
Ace	MIKNAVSLVTGGASGLGR	CG7113-PA	1	18	-	A	SG.Golgi,COF.SAX.CYT,COF.SCX.CYT,COF.SCX.MEM,COF.SCX.NUC
Ace	MIKTKSSDDKLDTLLSR	CG5346-PA	1	17	-	S	COF.SCX.MEM,COF.SCX.NUC
Ace	MIKTSVDKR	CG3174-PA	1	9	-	R	COF.SAX.CYT,COF.SCX.CYT,COF.SCX.MEM,COF.SCX.NUC
Ace	MILLEINNR	CG10954-PA	1	9	-	I	COF.SAX.CYT,COF.SCX.CYT,COF.SCX.MEM,COF.SCX.NUC
Ace	MINPIASESEAINSATYVDNYIDSVENLPDDVQR	CG7379-PA	1	34	-	Q	COF.SCX.CYT
Ace	MINTGKLAGR	CG5590-PA	1	10	-	T	COF.SCX.CYT,COF.SCX.MEM,COF.SCX.NUC
Ace	MISEVDSINKDSSVR	CG5300-PA	1	15	-	V	COF.SCX.CYT,COF.SCX.MEM,COF.SCX.NUC
Ace	MKDAKPFPVLKNDNLLR	CG1818-PA	1	17	-	A	COF.SCX.CYT
Ace	MKKAKPLLHDHLITIR	CG8571-PA	1	16	-	V	COF.SAX.CYT
Ace	MKKHEELETPTFTTYIPIDISE	CG10997-PA	239	260	K	-	SG.KcC
Ace	MKKILSKFER	CG10637-PA	1	10	-	N	COF.SCX.CYT,COF.SCX.MEM,COF.SCX.NUC	CG10637-PC	1	10	-	N
Ace	MKMADGSTILR	CG3403-PA	1	11	-	R	COF.SAX.CYT,COF.SCX.MEM,COF.SCX.NUC
Ace	MKQNPFVSSSR	CG6846-PA	1	11	-	R	SG.KcC,COF.SAX.CYT,COF.SCX.CYT,COF.SCX.MEM,COF.SCX.NUC
Ace	MLAGISEKSYAAEAR	CG1671-PA	1	15	-	Y	COF.SCX.MEM,COF.SCX.NUC
Ace	MLAKSVQKHAGR	CG8604-PA	8	19	I	A	COF.SAX.CYT
Ace	MLAPIKHLLGNYR	CG33085-PC	1	13	-	I	SG.KcC,COF.SAX.CYT
Ace	MLCEDQHMSVENTPQK	CG11886-PA	1	16	-	G	SG.chr
Ace	MLDVPHEAKVR	CG4347-PC	1	11	-	G	COF.SAX.CYT
Ace	MLHLEENER	CG8127-PB	41	49	E	Q	COF.SAX.CYT
Ace	MLIAFQDR	CG17257-PA	78	85	G	L	COF.SCX.MEM	CG17257-PB	78	85	G	L
Ace	MLKNKSMKTSKLYVIKR	CG5371-PA	1	17	-	D	COF.SCX.NUC
Ace	MLKSTIVDPR	CG7071-PA	1	10	-	V	COF.SCX.MEM,COF.SCX.NUC	CG7071-PB	1	10	-	V
Ace	MLLLNKNR	CG30172-PA	1	8	-	V	COF.SAX.CYT
Ace	MLPFTPQVVKR	CG2262-PA	1	11	-	L	COF.SCX.MEM
Ace	MLPTYER	CG3876-PA	1	7	-	F	COF.SCX.MEM
Ace	MLQIDEMLGDFNR	CG2358-PA	6	18	S	M	COF.SCX.NUC
Ace	MLSLQNQR	CG3086-PB	1	8	-	Q	COF.SAX.CYT,COF.SCX.CYT	CG3086-PC	1	8	-	Q	CG3086-PD	1	8	-	Q
Ace	MLSQLPLFAGGEIVR	CG2846-PA	1	15	-	G	COF.SCX.CYT,COF.SCX.NUC
Ace	MLSYLEDLKENEDQLR	CG7914-PA	1	16	-	D	COF.SCX.CYT
Ace	MLTETPMASENIMDELASLIR	CG9749-PA	1	21	-	T	COF.SCX.CYT,COF.SCX.MEM,COF.SCX.NUC
Ace	MLTNFESKSAR	CG7961-PA	1	11	-	V	COF.SAX.CYT,COF.SCX.CYT,COF.SCX.MEM,COF.SCX.NUC	CG7961-PB	1	11	-	V
Ace	MLYLEDYLEMIEHLPQELR	CG6632-PA	1	19	-	D	SG.chr
Ace	MMDTNGELGEFLFDK	CG2216-PA	189	203	K	T	SG.extract,SG.chr	CG2216-PB	189	203	K	T	CG2216-PC	189	203	K	T	CG2216-PD	189	203	K	T
Ace	MMENYEEIR	CG5216-PA	1	9	-	L	COF.SAX.CYT
Ace	MMESEVDSER	CG13090-PA	1	10	-	T	COF.SAX.CYT
Ace	MMNEDSSAAGGGGVKK	CG11857-PA	1	16	-	F	SG.KcM,SG.extract,SG.chr,COF.SCX.MEM,COF.SCX.NUC
Ace	MMSSLVKPGIFR	CG4098-PA	27	38	Q	H	COF.SCX.CYT,COF.SCX.NUC
Ace	MMTEKLNSGHTNLTSK	CG4916-PA	1	16	-	G	SG.KcC
Ace	MNAEKLKKLQAQVR	CG3644-PA	1	14	-	I	COF.SAX.CYT,COF.SCX.CYT,COF.SCX.MEM,COF.SCX.NUC	CG3644-PB	1	14	-	I
Ace	MNANLPISK	CG6779-PA	1	9	-	K	SG.KcM,COF.SAX.CYT,COF.SCX.CYT,COF.SCX.MEM,COF.SCX.NUC
Ace	MNAPPTFESFLLYEGEKK	CG6840-PA	1	18	-	I	SG.chr
Ace	MNAQQAQREHVLAVSR	CG17369-PA	1	16	-	D	SG.KcC	CG17369-PB	1	16	-	D
Ace	MNASAAAKR	CG18497-PA	1198	1206	M	R	COF.SCX.CYT	CG18497-PB	1198	1206	M	R	CG18497-PC	1141	1149	M	R
Ace	MNAVIALCHFCEAHGPCAIFCTQTLR	CG8616-PA	1	26	-	D	SG.extract
Ace	MNDEGEGPQDQKR	CG13425-PA	5	17	E	N	COF.SAX.CYT	CG13425-PC	11	23	E	N
Ace	MNEDSSAAGGGGVKKFFQR	CG11857-PA	2	20	M	L	COF.SCX.MEM,COF.SCX.NUC
Ace	MNEEYDAIVLGTGLK	CG4422-PA	1	15	-	E	SG.Golgi,SG.KcNR
Ace	MNEGNSAGGGHEGLSPAPPAVPDR	CG9696-PA	1	24	-	V	SG.chr	CG9696-PD	1	24	-	V	CG9696-PE	1	24	-	V
Ace	MNELDSLR	CG10545-PA	1	8	-	Q	SG.Golgi,SG.KcC,SG.KcM,SG.KcNR,SG.chr,COF.SCX.CYT,COF.SCX.NUC	CG10545-PB	1	8	-	Q	CG10545-PC	1	8	-	Q	CG10545-PD	1	8	-	Q	CG10545-PE	1	8	-	Q	CG10545-PF	1	8	-	Q
Ace	MNETLKLSGLGMQR	CG9239-PA	1	14	-	T	COF.SCX.NUC	CG9239-PB	1	14	-	T
Ace	MNFDDEDRLELQFLAGGNIVEHAPVFSPDGR	CG12050-PA	1	31	-	F	SG.chr
Ace	MNFVEQLFQR	CG33139-PA	266	275	H	L	COF.SCX.NUC
Ace	MNGGGGGEDDQHLPGVSSASGSAAGAVGGR	CG6190-PA	1	30	-	A	COF.SAX.CYT
Ace	MNGTTTAEQDADNVIR	CG16928-PA	1	16	-	I	COF.SAX.CYT,COF.SCX.CYT,COF.SCX.MEM,COF.SCX.NUC
Ace	MNHTANKPR	CG11885-PA	1	9	-	Q	SG.KcC,COF.SAX.CYT
Ace	MNINDGDFKDLR	CG17081-PA	1	12	-	C	COF.SCX.MEM,COF.SCX.NUC
Ace	MNKLDYPR	CG4943-PA	1	8	-	R	COF.SCX.NUC
Ace	MNKLKSSTHR	CG7427-PA	1	10	-	D	COF.SAX.CYT
Ace	MNKNLGFVER	CG1112-PA	1	10	-	L	COF.SCX.CYT,COF.SCX.MEM,COF.SCX.NUC	CG1112-PB	1	10	-	L
Ace	MNLFEELDTLDPSFKLEPPR	CG10850-PA	22	41	T	I	COF.SCX.CYT
Ace	MNLPAKMDVEKDKLR	CG4043-PA	1	15	-	Q	COF.SCX.CYT,COF.SCX.MEM,COF.SCX.NUC
Ace	MNMTVDPR	CG10674-PA	1	8	-	R	COF.SCX.NUC
Ace	MNNFEIR	CG3353-PA	1	7	-	E	COF.SAX.CYT,COF.SCX.CYT
Ace	MNNIEEDTEAAFKR	CG31658-PA	1	14	-	L	COF.SCX.CYT,COF.SCX.MEM
Ace	MNNQLNPATYR	CG7752-PA	1	11	-	K	COF.SCX.CYT,COF.SCX.MEM,COF.SCX.NUC
Ace	MNPYEYESTLDCR	CG5723-PB	1	13	-	D	COF.SCX.MEM,COF.SCX.NUC
Ace	MNQADVTKLMSQLR	CG13880-PA	1	14	-	I	COF.SCX.MEM,COF.SCX.NUC
Ace	MNSEHGFNPAFNMATIR	CG9113-PA	1	17	-	Q	SG.chr,COF.SAX.CYT	CG9113-PC	1	17	-	Q	CG9113-PE	1	17	-	Q
Ace	MNSILITGCNR	CG10964-PA	1	11	-	G	COF.SCX.CYT,COF.SCX.MEM,COF.SCX.NUC
Ace	MNSNIFLGTAENGLR	CG9242-PA	1	15	-	H	SG.KcC,COF.SCX.CYT,COF.SCX.MEM,COF.SCX.NUC
Ace	MNSSGFMFNIDNGYLEGLCR	CG2934-PA	1	20	-	G	SG.Golgi,COF.SCX.NUC
Ace	MNSSNDLSDELIR	CG6338-PA	1	13	-	R	COF.SCX.CYT,COF.SCX.MEM
Ace	MNTGISLNER	CG9775-PA	1	10	-	F	COF.SCX.MEM,COF.SCX.NUC	CG9775-PC	1	10	-	F
Ace	MNTQSKVYR	CG7015-PA	1	9	-	T	COF.SAX.CYT,COF.SCX.CYT,COF.SCX.NUC
Ace	MNTTAKVFVGSLPR	CG7903-PA	1	14	-	C	COF.SCX.CYT,COF.SCX.NUC
Ace	MNYNPNPASAAGR	CG5484-PB	1	13	-	P	COF.SCX.CYT,COF.SCX.MEM,COF.SCX.NUC
Ace	MNYNPNPGMR	CG5484-PA	1	10	-	N	COF.SCX.NUC	CG5484-PC	1	10	-	N
Ace	MQAKATDSR	CG4215-PA	1	9	-	Q	COF.SCX.CYT	CG4215-PB	47	55	K	Q
Ace	MQAPPPEHCPGVESEEAGK	CG17904-PA	1	19	-	G	SG.extract,SG.chr
Ace	MQEAYVNINSIPTHIFTWGR	CG9186-PA	1	20	-	W	SG.chr	CG9186-PB	1	20	-	W
Ace	MQEQEMEVEVGDPAKASNLLR	CG30496-PA	1	21	-	L	COF.SCX.CYT,COF.SCX.NUC
Ace	MQEQSPELYEEVKLFR	CG12770-PA	1	16	-	N	COF.SCX.CYT,COF.SCX.MEM,COF.SCX.NUC
Ace	MQETDTEQEATPHTIQAR	CG2863-PA	8	25	K	L	SG.KcC,SG.chr,COF.SAX.CYT
Ace	MQFVASEHPHR	CG9232-PA	1	11	-	R	COF.SAX.CYT
Ace	MQGGKFR	CG30495-PA	1	7	-	K	COF.SAX.CYT
Ace	MQHDDVVWSIINK	CG10648-PA	1	13	-	S	SG.chr
Ace	MQIDPELEAIKAR	CG2163-PA	38	50	S	V	COF.SCX.CYT,COF.SCX.MEM,COF.SCX.NUC	CG2163-PB	38	50	S	V
Ace	MQKQEETLSR	CG7044-PA	1	10	-	L	COF.SAX.CYT,COF.SCX.CYT,COF.SCX.MEM
Ace	MQMNPSVTIER	CG8208-PA	1	11	-	K	COF.SCX.MEM,COF.SCX.NUC	CG8208-PB	1	11	-	K
Ace	MQNNPSPQLPCKGILKTSR	CG10574-PA	1	19	-	S	COF.SAX.CYT
Ace	MQSMKADELPENPR	CG4562-PA	1	14	-	E	COF.SCX.MEM,COF.SCX.NUC	CG14709-PA	1	14	-	E
Ace	MQSNIENVSR	CG14149-PA	1	10	-	D	COF.SAX.CYT,COF.SCX.CYT
Ace	MQSPAFAYR	CG5276-PA	1	9	-	E	COF.SCX.MEM,COF.SCX.NUC
Ace	MQSSAGGASGGSNYEDVAAAR	CG17299-PA	1	21	-	R	COF.SCX.NUC	CG17299-PB	1	21	-	R
Ace	MQSTSSTSSGSCSRPLEGSTLNSGGSAENVAR	CG7611-PA	1	32	-	D	SG.chr	CG7611-PB	1	32	-	D	CG7611-PC	1	32	-	D	CG7611-PD	1	32	-	D	CG7611-PE	1	32	-	D	CG7611-PF	1	32	-	D	CG7611-PG	1	32	-	D	CG7611-PH	1	32	-	D
Ace	MQSVLNTVKGTALNVAEYLTPVLK	CG6877-PA	1	24	-	E	SG.KcNR
Ace	MQSYADALSAKGYR	CG32626-PA	1	14	-	S	COF.SCX.CYT,COF.SCX.MEM,COF.SCX.NUC
Ace	MQVENLHTSVACNR	CG11887-PA	1	14	-	C	SG.chr,COF.SAX.CYT
Ace	MQVNPKHNTEAHR	CG15266-PA	1	13	-	Q	COF.SAX.CYT
Ace	MQVNVAGLR	CG8532-PA	8	16	D	R	COF.SCX.CYT	CG8532-PB	1	9	-	R	CG8532-PC	1	9	-	R	CG8532-PD	1	9	-	R	CG8532-PE	8	16	D	R
Ace	MQYSSSSENYSSSLR	CG8547-PA	1	15	-	D	COF.SCX.NUC	CG8547-PB	1	15	-	D
Ace	MTLDVGGVAR	CG1518-PA	1	10	-	G	COF.SCX.MEM,COF.SCX.NUC
Ace	MTNGDCFVVLPENCAEGTLIIGR	CG10098-PA	1	23	-	N	COF.SCX.CYT
Ace	MTQDMLLGNEEPSKSKETFLEK	CG2038-PA	1	22	-	F	SG.KcC
Ace	MTQIMFETFNAPAMYVAIQAVLSLYASGR	CG18290-PA	120	148	K	T	SG.extract	CG18290-PB	120	148	K	T
Ace	MVEDKEQVANGEQVSK	CG3821-PA	1	16	-	K	SG.KcC,SG.chr
Ace	MVESDGTADATR	CG6359-PA	2	13	M	R	COF.SAX.CYT,COF.SCX.CYT,COF.SCX.MEM,COF.SCX.NUC
Ace	MVETVVNIER	CG15211-PA	1	10	-	T	SG.Mito
Ace	MVGITPAEKKALITR	CG4561-PA	1	15	-	N	COF.SCX.CYT
Ace	MVLDLDLFR	CG17259-PA	1	9	-	S	COF.SCX.CYT,COF.SCX.NUC
Ace	MVMDATQSQQPSPQSVGR	CG9412-PA	1	18	-	E	COF.SCX.MEM,COF.SCX.NUC	CG9412-PB	1	18	-	E	CG9412-PC	1	18	-	E	CG9412-PD	1	18	-	E	CG9412-PE	1	18	-	E
Ace	MVPNEKSFPR	CG5728-PA	1	10	-	G	COF.SCX.NUC
Ace	MYGGDEYATNSDYYDDYAHTGDPQLDMEYER	CG5642-PA	1	31	-	N	SG.KcM,SG.chr
Ace	MYGKSKTSAVPSDAQAR	CG7187-PA	1	17	-	E	COF.SCX.CYT	CG7187-PB	1	17	-	E	CG7187-PC	1	17	-	E
Ace	MYNGIGLTTPR	CG7971-PA	1	11	-	G	COF.SCX.MEM,COF.SCX.NUC	CG7971-PC	1	11	-	G
Ace	MYNSAKQLQR	CG4633-PA	1	10	-	V	COF.SCX.MEM,COF.SCX.NUC
Ace	MYPFGTPTVVPAANFDAVKDAHDLR	CG9968-PA	1	25	-	K	SG.KcC,SG.KcNR
Ace	MYPVSSQKR	CG7405-PA	1	9	-	S	COF.SAX.CYT,COF.SCX.NUC
Ace	MYQEYLYQLR	CG1115-PA	1	10	-	A	COF.SCX.CYT,COF.SCX.MEM,COF.SCX.NUC
Ace	MYQPSLKVQPAEVSVLNATGR	CG9324-PA	1	21	-	V	COF.SCX.CYT
Ace	MYQSACQAATTGSCVPGTGQQPDNER	CG6017-PA	1	26	-	Q	COF.SCX.MEM
Ace	SAAAGLIPPPVSWAQR	CG16817-PA	2	17	M	N	COF.SAX.CYT
Ace	SAAAPKLVAVAESR	CG10512-PA	87	100	M	R	COF.SAX.CYT,COF.SCX.CYT,COF.SCX.NUC	CG10512-PB	22	35	M	R	CG10512-PC	2	15	M	R	CG10512-PD	2	15	M	R
Ace	SAAETGPIASGSAVSTGQR	CG9853-PA	2	20	M	G	COF.SAX.CYT,COF.SCX.CYT,COF.SCX.NUC
Ace	SAATAAAAASGIQSTAGAIPMR	CG1017-PA	2	23	M	N	COF.SCX.CYT
Ace	SAATEQQNNGDVAVEK	CG9894-PA	2	17	M	V	SG.KcC,SG.KcGel	CG9894-PB	2	17	M	V
Ace	SAATKGIYIVAAKR	CG4600-PA	2	15	M	T	COF.SCX.CYT,COF.SCX.NUC
Ace	SADILQKSR	CG4070-PA	2	10	M	E	COF.SCX.CYT
Ace	SAFIEETKSLLPR	CG13645-PA	33	45	M	I	COF.SCX.CYT	CG13645-PB	33	45	M	I
Ace	SAFPGTFAFDEYGR	CG8439-PA	2	15	M	P	SG.extract,SG.chr,COF.SAX.CYT,COF.SCX.CYT
Ace	SAGMPINPKPFLNGLTGKPVLVK	CG16792-PA	2	24	M	L	SG.KcC
Ace	SAKAITEASGKDILNR	CG8322-PA	2	17	M	H	COF.SAX.CYT,COF.SCX.CYT,COF.SCX.MEM,COF.SCX.NUC	CG8322-PB	2	17	M	H
Ace	SAKPILYYAPR	CG5224-PA	2	12	M	S	COF.SAX.CYT,COF.SCX.CYT,COF.SCX.MEM,COF.SCX.NUC
Ace	SALLNEIQR	CG6535-PA	2	10	M	I	COF.SCX.MEM
Ace	SALNLTVR	CG9769-PA	2	9	M	V	COF.SAX.CYT,COF.SCX.MEM
Ace	SALSSKLLMKR	CG30327-PA	2	12	M	M	COF.SCX.MEM,COF.SCX.NUC
Ace	SANGDYKNAASIYEFTVKDTHGNDVSLEK	CG12013-PA	2	30	M	Y	SG.KcC	CG12013-PB	2	30	M	Y	CG12013-PC	31	59	M	Y	CG12013-PD	71	99	M	Y
Ace	SAPKGDGNLVPTVR	CG32243-PA	2	15	M	E	COF.SAX.CYT,COF.SCX.CYT
Ace	SAPSEGGAGGGPVGGGSTATAPSAHPAVAAK	CG11006-PA	2	32	M	I	SG.KcM
Ace	SAPSNKMSATDQMR	CG7564-PA	2	15	M	A	COF.SCX.NUC
Ace	SAPTDQPPR	CG9159-PA	2	10	M	S	SG.chr,COF.SCX.NUC
Ace	SAQEKAFELQR	CG13570-PA	2	12	M	Q	COF.SCX.CYT,COF.SCX.MEM,COF.SCX.NUC
Ace	SAQEKVIR	CG9165-PA	2	9	M	V	COF.SAX.CYT,COF.SCX.CYT
Ace	SAQPSPHMNPQQQQQQQQQQQQTEQEK	CG14213-PA	2	28	M	V	SG.KcM,SG.chr	CG14213-PB	2	28	M	V
Ace	SASAEQETAPIANSR	CG10413-PA	2	16	M	S	COF.SCX.MEM,COF.SCX.NUC
Ace	SASATNGTHYEQLHQGR	CG17273-PA	2	18	M	T	SG.KcC,COF.SAX.CYT
Ace	SATDASTADSGAKR	CG6171-PA	2	15	M	K	COF.SAX.CYT,COF.SCX.CYT
Ace	SATETLNVEAATPEIGEEVKK	CG4008-PA	2	22	M	Q	SG.KcM,SG.chr
Ace	SATPPDLLSLAASR	CG5836-PA	2	15	M	E	COF.SCX.CYT,COF.SCX.MEM,COF.SCX.NUC
Ace	SATSTIVMPGER	CG31938-PA	2	13	M	I	COF.SCX.CYT,COF.SCX.MEM,COF.SCX.NUC
Ace	SAVKESKALIKDIR	CG8777-PA	2	15	M	E	COF.SCX.CYT,COF.SCX.MEM,COF.SCX.NUC
Ace	SAVTSSDTAISGMALGR	CG7184-PA	2	18	M	S	COF.SCX.MEM,COF.SCX.NUC	CG7184-PB	2	18	M	S
Ace	SAYKLETAPFDPR	CG14235-PA	21	33	M	F	COF.SCX.MEM,COF.SCX.NUC	CG14235-PB	2	14	M	F	CG14235-PC	2	14	M	F
Ace	SCPGFGELNIPSSR	CG2046-PA	2	15	M	A	COF.SAX.CYT,COF.SCX.CYT,COF.SCX.NUC
Ace	SDAEETKAEATTK	CG7974-PA	2	14	M	V	SG.chr
Ace	SDDDDIQYIKR	CG6322-PA	2	12	M	Q	COF.SCX.CYT,COF.SCX.MEM
Ace	SDFENLSGNDKELQEFLLIEK	CG1728-PA	2	22	M	Q	SG.chr
Ace	SDFNKYCEEAAR	CG12134-PA	2	13	M	E	COF.SAX.CYT
Ace	SDGIEVEQLVESKPR	CG6891-PA	2	16	M	R	SG.KcGel,SG.Mito,SG.extract,COF.SAX.CYT,COF.SCX.CYT,COF.SCX.MEM,COF.SCX.NUC
Ace	SDILAETQAANR	CG6254-PA	2	13	M	D	COF.SCX.MEM
Ace	SDIMNIDSIISR	CG6593-PA	2	13	M	L	COF.SCX.CYT,COF.SCX.MEM,COF.SCX.NUC
Ace	SDISSEDLR	CG1240-PA	2	10	M	R	COF.SAX.CYT,COF.SCX.CYT,COF.SCX.MEM,COF.SCX.NUC
Ace	SDKLVLYGMDISPPVR	CG17523-PA	2	17	M	A	COF.SCX.CYT,COF.SCX.NUC
Ace	SDKPKRPLSAYMLWLNSAR	CG17950-PA	2	20	M	E	SG.KcC	CG17950-PB	2	20	M	E
Ace	SDKTKEDLKR	CG3511-PA	2	11	M	S	COF.SCX.CYT
Ace	SDKTVELMNPHLETAR	CG17224-PA	2	17	M	S	COF.SAX.CYT	CG17224-PB	2	17	M	S
Ace	SDLDWDDPNYVEKPAVHQEYSKPNNK	CG7878-PA	2	27	M	Y	SG.chr
Ace	SDLGKDVASEEGSNGSR	CG30096-PA	2	18	M	E	COF.SCX.CYT,COF.SCX.MEM
Ace	SDNNSGSGGGGSGGGGAGNNNSANSGKNSTHR	CG1440-PA	2	33	M	F	COF.SAX.CYT
Ace	SDNPAAENEKRPQFGTR	CG13929-PA	2	18	M	L	COF.SAX.CYT
Ace	SDNQICDISNEVLEELKK	CG5869-PA	2	19	M	F	SG.chr,COF.SCX.CYT
Ace	SDPGSAGYNITKDPALAKSR	CG8614-PA	2	21	M	I	COF.SCX.MEM,COF.SCX.NUC
Ace	SDSAVATSASPVAAPPATVEK	CG31617-PA	2	22	M	K	SG.Golgi,SG.KcGel,SG.extract,SG.chr
Ace	SDSDLDALR	CG13072-PA	2	10	M	A	COF.SAX.CYT,COF.SCX.CYT,COF.SCX.MEM,COF.SCX.NUC
Ace	SDSGVFAFELGDDLATR	CG5733-PA	2	18	M	C	COF.SCX.CYT,COF.SCX.MEM,COF.SCX.NUC
Ace	SDSSKGKVLQNTGKFVSENR	CG6768-PA	2	21	M	T	COF.SAX.CYT
Ace	SDVFIVSAAR	CG9149-PA	2	11	M	T	COF.SAX.CYT,COF.SCX.CYT,COF.SCX.MEM,COF.SCX.NUC
Ace	SDVLKSSQER	CG7818-PA	2	11	M	S	COF.SCX.CYT,COF.SCX.MEM,COF.SCX.NUC
Ace	SDWDSVTVLR	CG4143-PA	2	11	M	K	COF.SAX.CYT	CG4143-PB	2	11	M	K
Ace	SDYSDLDR	CG32505-PA	2	9	M	Q	COF.SAX.CYT,COF.SCX.CYT	CG32505-PE	2	9	M	Q
Ace	SEAEKQAVSFACQR	CG5429-PA	2	15	M	C	COF.SCX.CYT,COF.SCX.MEM
Ace	SEAGTSADAVAAEKER	CG11699-PA	2	17	M	K	COF.SCX.MEM,COF.SCX.NUC
Ace	SEALDKLEVEKEAR	CG4159-PA	2	15	M	K	COF.SAX.CYT,COF.SCX.CYT
Ace	SEATVAQKPEAVEDVNASTGDEK	CG1910-PA	2	24	M	Q	SG.KcC,SG.chr,COF.SCX.CYT
Ace	SEDKQFIR	CG7772-PA	2	9	M	R	COF.SCX.MEM
Ace	SEDQGKDYTLESDSELR	CG5970-PA	2	18	M	F	COF.SCX.CYT,COF.SCX.MEM
Ace	SEEALAGVPLVHISPEGIFK	CG7933-PA	2	21	M	Y	SG.KcGel,SG.KcM,SG.extract,SG.chr	CG7933-PB	18	37	M	Y	CG7933-PC	2	21	M	Y
Ace	SEEFKLPKR	CG5383-PA	2	10	M	S	COF.SCX.CYT
Ace	SEEKKNGDELNDLLDSALQDFDK	CG5325-PA	2	24	M	S	SG.KcC	CG5325-PB	2	24	M	S
Ace	SEKKGALKVIPSASEEQLVQALGDLLQR	CG17333-PA	2	29	M	C	COF.SCX.CYT
Ace	SEKNLKVGAR	CG9206-PA	2	11	M	V	COF.SAX.CYT
Ace	SEKPTVLILGGCGFIGR	CG5854-PA	2	18	M	N	SG.chr,COF.SAX.CYT,COF.SCX.CYT,COF.SCX.MEM,COF.SCX.NUC
Ace	SELNMELKKLR	CG9020-PA	2	12	M	E	COF.SCX.CYT,COF.SCX.MEM,COF.SCX.NUC
Ace	SELQEFNQAAEDVK	CG8498-PA	2	15	M	N	SG.KcGel
Ace	SEMQMDCALDLMR	CG17158-PA	2	14	M	R	COF.SAX.CYT,COF.SCX.CYT,COF.SCX.NUC
Ace	SENNEASVETNCFR	CG10225-PA	2	15	M	G	COF.SAX.CYT,COF.SCX.CYT
Ace	SENTYQIETR	CG3287-PB	2	11	M	R	COF.SCX.MEM,COF.SCX.NUC	CG3287-PC	2	11	M	R
Ace	SEPDPQELGAEVVSGLVATSDDR	CG7413-PA	2	24	M	L	COF.SCX.CYT
Ace	SEPEPDVKPNILITGTPGAGK	CG8816-PA	2	22	M	S	SG.chr
Ace	SEQKTSGSGSAAAAR	CG9181-PA	2	16	M	L	COF.SAX.CYT,COF.SCX.NUC	CG9181-PB	2	16	M	L
Ace	SEQQDETVVCLPGER	CG6249-PA	2	16	M	L	COF.SCX.CYT,COF.SCX.MEM
Ace	SESAVAVEPEER	CG3338-PA	2	13	M	M	COF.SAX.CYT,COF.SCX.CYT,COF.SCX.MEM,COF.SCX.NUC
Ace	SESLDKTTSPSSASSR	CG32484-PA	2	17	M	A	COF.SCX.MEM
Ace	SETINTAAQFPSFEKPTVQFNEK	CG10161-PB	2	24	M	G	SG.KcM,SG.extract,SG.chr
Ace	SETLQLR	CG7111-PA	2	8	M	G	COF.SAX.CYT,COF.SCX.CYT,COF.SCX.MEM,COF.SCX.NUC
Ace	SETSSVNVDADR	CG16940-PA	2	13	M	D	COF.SCX.CYT	CG16940-PB	2	13	M	D	CG16940-PC	14	25	M	D
Ace	SETVDSTEVKSPSYDLSKFQLKR	CG2091-PA	2	24	M	I	COF.SCX.CYT
Ace	SEVPESSKKR	CG8363-PA	2	11	M	Q	COF.SAX.CYT	CG8363-PB	2	11	M	Q	CG8363-PC	2	11	M	Q
Ace	SEVQTLMDMGFPR	CG8209-PA	2	14	M	E	COF.SAX.CYT,COF.SCX.CYT,COF.SCX.NUC
Ace	SEYTSILQR	CG9330-PA	2	10	M	E	COF.SAX.CYT,COF.SCX.CYT,COF.SCX.MEM,COF.SCX.NUC
Ace	SFAEKITGLLAR	CG6151-PA	2	13	M	P	COF.SCX.MEM,COF.SCX.NUC	CG6151-PB	2	13	M	P	CG6151-PC	2	13	M	P
Ace	SFFGKMFGGKKEVAPTTGEAIQKLR	CG8055-PA	2	26	M	E	COF.SCX.NUC
Ace	SFIDQEVTEFR	CG17260-PA	2	12	M	A	COF.SCX.NUC
Ace	SFKGNPKVQKVMVQPINLIFR	CG18591-PA	2	22	M	Y	COF.SAX.CYT,COF.SCX.NUC
Ace	SFLPGEPVPPGFEEDVSR	CG7065-PA	2	19	M	T	COF.SCX.NUC
Ace	SFSSDEVNFLVYR	CG4063-PA	2	14	M	Y	COF.SCX.CYT,COF.SCX.MEM,COF.SCX.NUC
Ace	SFVGGGGCGGQDVHK	CG31756-PA	2	16	M	F	SG.KcNR,SG.chr
Ace	SFVGKKYKLDKSENFDEYMKELGVGLVTR	CG31305-PI	2	30	M	K	COF.SCX.CYT	CG31305-PJ	2	30	M	K
Ace	SGALGDVVSEYLER	CG1265-PB	2	15	M	G	COF.SCX.MEM,COF.SCX.NUC
Ace	SGGLDILSLK	CG14792-PA	2	11	M	E	SG.Golgi,SG.KcM,SG.Mito,SG.extract,SG.chr	CG14792-PB	2	11	M	E	CG14792-PD	45	54	M	E
Ace	SGGTMLYGGDEIGALVFDPGHHSLR	CG6546-PA	2	26	M	V	SG.KcC
Ace	SGIAITR	CG3018-PA	2	8	M	L	COF.SAX.CYT	CG3018-PB	2	8	M	L
Ace	SGIGGIGVLLEAAQFLEQHEK	CG13316-PA	2	22	M	L	SG.chr	CG13316-PC	2	22	M	L
Ace	SGITLTKLTQER	CG17678-PA	2	13	M	I	COF.SCX.MEM,COF.SCX.NUC
Ace	SGKALNIGDQFPNFTAETSEGR	CG3083-PA	2	23	M	I	COF.SAX.CYT,COF.SCX.CYT,COF.SCX.NUC
Ace	SGKYDLLSEQGLR	CG15481-PA	2	14	M	L	COF.SCX.CYT,COF.SCX.MEM,COF.SCX.NUC
Ace	SGLESYINHTVSIITADGR	CG2021-PA	2	20	M	N	SG.chr,COF.SAX.CYT
Ace	SGPLPEISEEQR	CG13893-PA	2	13	M	A	COF.SAX.CYT,COF.SCX.CYT,COF.SCX.NUC
Ace	SGSGLDENPFGEPNLDNPFADPAIQQAR	CG9195-PA	2	29	M	R	COF.SCX.CYT,COF.SCX.MEM,COF.SCX.NUC	CG9195-PB	2	29	M	R
Ace	SGSLPATFVKGFHDEEKVR	CG3397-PA	2	20	M	R	COF.SAX.CYT	CG12224-PA	2	20	M	R
Ace	SGSQLFPVNLNNLSAKER	CG16890-PA	2	19	M	H	COF.SAX.CYT	CG16890-PB	2	19	M	H
Ace	SGSQVGDLGSGAGK	CG13551-PA	22	35	M	G	SG.KcGel,SG.extract,SG.chr,COF.SAX.CYT	CG13551-PB	22	35	M	G	CG13551-PC	2	15	M	G
Ace	SGSVLSLAR	CG3705-PA	2	10	M	P	COF.SCX.CYT
Ace	SGTTATIR	CG3751-PA	2	9	M	T	COF.SCX.CYT,COF.SCX.MEM,COF.SCX.NUC
Ace	SGVDQMKIPGNTAKSVEER	CG6422-PA	2	20	M	N	COF.SCX.MEM,COF.SCX.NUC
Ace	SGVEEQASLLR	CG3028-PA	2	12	M	V	COF.SAX.CYT,COF.SCX.CYT
Ace	SGYTDLTKLETSR	CG2765-PA	2	14	M	N	COF.SAX.CYT,COF.SCX.CYT,COF.SCX.MEM,COF.SCX.NUC
Ace	SHAIDELQAIIADLK	CG1749-PA	2	16	M	T	SG.KcNR,SG.extract,SG.chr
Ace	SHFTCLNCDAR	CG6769-PA	2	12	M	F	COF.SAX.CYT
Ace	SHHSDDQLLQAGSDSFWEPGNYKR	CG33094-PB	2	25	M	T	SG.KcC
Ace	SHNVDVEKCLEVASNLVSEAGR	CG9391-PA	2	23	M	L	SG.KcNR	CG9391-PB	61	82	M	L
Ace	SIANVSTHYISEK	CG7671-PA	2	14	M	V	SG.KcM,SG.chr,COF.SAX.CYT
Ace	SIEIESADVIR	CG5451-PA	2	12	M	L	COF.SCX.CYT,COF.SCX.MEM,COF.SCX.NUC
Ace	SIIPLLHLAR	CG4466-PA	2	11	M	E	SG.extract,COF.SAX.CYT
Ace	SILAYNGGCVVAMR	CG11981-PA	2	15	M	G	COF.SAX.CYT,COF.SCX.CYT,COF.SCX.NUC
Ace	SIPNEYIAKTEDVAEQVIKR	CG6202-PA	2	21	M	G	COF.SCX.CYT,COF.SCX.NUC	CG6202-PB	2	21	M	G
Ace	SIQNLNTR	CG17737-PA	2	9	M	D	SG.KcC,SG.KcGel,COF.SAX.CYT,COF.SCX.CYT,COF.SCX.NUC
Ace	SKAKGKKKER	CG1703-PA	2	11	M	F	COF.SAX.CYT
Ace	SKAKKVLDEAR	CG9031-PA	13	23	M	E	COF.SAX.CYT,COF.SCX.CYT,COF.SCX.MEM,COF.SCX.NUC
Ace	SKAPAVGIDLGTTYSCVGVFQHGK	CG4264-PA	2	25	M	V	SG.KcNR	CG4264-PB	2	25	M	V	CG4264-PC	2	25	M	V	CG4264-PD	2	25	M	V	CG4264-PE	2	25	M	V	CG4264-PF	2	25	M	V
Ace	SKAVNNMSMGDVEPQER	CG2224-PA	2	18	M	M	COF.SCX.CYT
Ace	SKEDKEKTQIIDKDLDLSNAGR	CG6538-PA	2	23	M	G	SCX.CYT,COF.SCX.MEM,COF.SCX.NUC
Ace	SKIFTPTNQIR	CG8549-PA	2	12	M	L	COF.SAX.CYT,COF.SCX.CYT,COF.SCX.MEM,COF.SCX.NUC
Ace	SKIGINGFGR	CG8893-PA	2	11	M	I	COF.SAX.CYT,COF.SCX.CYT,COF.SCX.MEM,COF.SCX.NUC	CG8893-PB	2	11	M	I	CG12055-PA	2	11	M	I
Ace	SKIKKFFSR	CG5469-PB	2	10	M	K	COF.SAX.CYT	CG5469-PC	2	10	M	K	CG5469-PD	2	10	M	K
Ace	SKIPGSNLEFVR	CG5714-PA	2	13	M	E	COF.SAX.CYT
Ace	SKPALYYATLSPPSR	CG16936-PA	2	16	M	A	SG.KcM,SG.extract,COF.SAX.CYT,COF.SCX.CYT,COF.SCX.NUC
Ace	SKPDSKLDKYAQR	CG10120-PA	183	195	M	D	COF.SCX.CYT,COF.SCX.NUC	CG10120-PB	187	199	M	D
Ace	SKPTLYYALFSPPAR	CG11784-PA	2	16	M	A	COF.SAX.CYT
Ace	SKPVPMSPSFVDEDLHNLR	CG9261-PA	2	20	M	K	SG.KcM,SG.Mito,SG.chr	CG9261-PD	2	20	M	K
Ace	SKSGEFTFR	CG4210-PA	2	10	M	R	COF.SAX.CYT,COF.SCX.CYT
Ace	SKTSNIMR	CG8132-PA	2	9	M	L	COF.SAX.CYT,COF.SCX.NUC
Ace	SKYDSKYLEEKLKR	CG33009-PB	2	15	M	E	COF.SAX.CYT,COF.SCX.CYT,COF.SCX.NUC
Ace	SLADMGTASR	CG31536-PA	2	11	M	S	COF.SCX.MEM,COF.SCX.NUC	CG31536-PB	2	11	M	S	CG31536-PC	2	11	M	S
Ace	SLEILKQGAEGR	CG10673-PA	2	13	M	L	COF.SCX.CYT,COF.SCX.MEM,COF.SCX.NUC
Ace	SLEQLKSDVAELAAFLQQAK	CG3226-PA	2	21	M	G	SG.KcNR
Ace	SLEQQPAVDPHNPHGLGDPNDTR	CG17996-PA	2	24	M	L	SG.chr
Ace	SLFGLIVSGR	CG13926-PA	2	11	M	L	COF.SAX.CYT,COF.SCX.MEM
Ace	SLFPAYGAGR	CG5877-PA	2	11	M	T	COF.SCX.CYT
Ace	SLGNARPLVSVYTEK	CG5502-PA	2	16	M	N	SG.KcC,SG.KcGel,SG.KcM
Ace	SLKKALDDCMIDFDR	CG3975-PA	2	16	M	C	COF.SCX.NUC
Ace	SLNPQYEDIGKGFVQQYYAIFDDPANR	CG1740-PA	2	28	M	A	COF.SCX.CYT
Ace	SLNYEQNAADEQFAR	CG3688-PA	2	16	M	A	COF.SAX.CYT
Ace	SLQSDAVFQK	CG11151-PA	2	11	M	I	SG.KcM
Ace	SLQSIKYSR	CG11334-PA	2	10	M	G	COF.SAX.CYT,COF.SCX.CYT,COF.SCX.NUC	CG11334-PB	2	10	M	G
Ace	SLSTLLSLVDELQEPR	CG4183-PA	2	17	M	S	SG.extract,COF.SCX.MEM
Ace	SLTDVLELNKTELFAK	CG6819-PA	2	17	M	I	SG.chr,COF.SCX.NUC
Ace	SLTGTQDYDR	CG12730-PA	2	11	M	K	COF.SCX.MEM,COF.SCX.NUC
Ace	SLTITSSVTHPELK	CG7266-PA	2	15	M	D	SG.KcC,SG.extract,SG.chr	CG7266-PB	2	15	M	D	CG7266-PC	2	15	M	D
Ace	SLTKKDPSLR	CG5004-PA	2	11	M	V	COF.SCX.MEM
Ace	SLTSAAGIISLLDEPMPDLK	CG11888-PA	2	21	M	V	SG.extract
Ace	SLTVEIVATKPYEGQKPGTSGLR	CG5165-PA	2	24	M	K	SG.KcC,SG.KcGel
Ace	SLVIPEKFQHILR	CG8900-PA	2	14	M	I	COF.SAX.CYT	CG8900-PB	2	14	M	I
Ace	SMAKYLNR	CG9601-PA	2	9	M	S	COF.SCX.CYT,COF.SCX.NUC
Ace	SMDASNSVESR	CG9373-PA	2	12	M	E	COF.SCX.CYT,COF.SCX.MEM,COF.SCX.NUC
Ace	SMEECFVPR	CG9578-PA	2	10	M	L	COF.SCX.CYT
Ace	SMFWGLNMKPER	CG6226-PA	2	13	M	K	SG.chr
Ace	SMSATCYKCNR	CG3800-PA	2	12	M	P	COF.SAX.CYT,COF.SCX.CYT,COF.SCX.NUC
Ace	SMSIDSNKLLLR	CG5274-PA	2	13	M	K	COF.SCX.MEM,COF.SCX.NUC	CG5274-PB	2	13	M	K
Ace	SMSKTTNTYNR	CG14641-PA	2	12	M	Q	COF.SAX.CYT,COF.SCX.CYT,COF.SCX.MEM,COF.SCX.NUC
Ace	SNFVNLDIFSNYQKYIDNEQEVR	CG11761-PA	2	24	M	E	COF.SCX.CYT
Ace	SNGGGAGGLGAARPPPR	CG5442-PB	2	18	M	I	SG.KcC,SG.chr,COF.SAX.CYT
Ace	SNITAAVIANR	CG6841-PA	2	12	M	N	COF.SCX.MEM
Ace	SNIVQYIVVR	CG14903-PA	2	11	M	S	COF.SAX.CYT,COF.SCX.CYT,COF.SCX.NUC
Ace	SNLSVGQIIMDAQR	CG10158-PA	2	15	M	M	COF.SCX.CYT,COF.SCX.MEM,COF.SCX.NUC
Ace	SNLYVLYEHAAGFSLFSVK	CG13849-PA	2	20	M	E	SG.extract
Ace	SNNYNDVPFGIR	CG10069-PA	14	25	M	A	COF.SCX.MEM,COF.SCX.NUC	CG10069-PB	52	63	M	A	CG10069-PC	14	25	M	A
Ace	SNPEIEAQLAPLR	CG6778-PA	2	14	M	E	COF.SCX.CYT,COF.SCX.MEM,COF.SCX.NUC	CG6778-PB	88	100	M	E
Ace	SNVPIVGGISQLEGNER	CG8066-PA	2	18	M	K	SG.KcC,COF.SCX.CYT
Ace	SQAKKAKR	CG9740-PA	2	9	M	P	COF.SAX.CYT
Ace	SQDEIITNTKTVLQGLEALR	CG5433-PA	5	24	M	V	COF.SCX.CYT
Ace	SQEAGQYPPIESAMR	CG31126-PA	2	16	M	K	COF.SCX.CYT,COF.SCX.NUC
Ace	SQEVEETLKR	CG10751-PA	2	11	M	I	COF.SCX.CYT,COF.SCX.MEM,COF.SCX.NUC
Ace	SQGASEVPLSALR	CG31472-PA	11	23	M	L	COF.SAX.CYT,COF.SCX.CYT,COF.SCX.MEM,COF.SCX.NUC	CG31472-PB	2	14	M	L
Ace	SQKSIDLGLGVR	CG18186-PA	2	13	M	N	COF.SCX.CYT,COF.SCX.NUC
Ace	SQKTERPVLSGQR	CG2922-PA	2	14	M	I	SG.KcC,COF.SAX.CYT	CG2922-PB	2	14	M	I	CG2922-PC	2	14	M	I	CG2922-PD	2	14	M	I	CG2922-PE	2	14	M	I	CG2922-PF	2	14	M	I	CG2922-PG	2	14	M	I
Ace	SQNDNLLIQIR	CG15445-PA	2	12	M	A	COF.SCX.CYT,COF.SCX.NUC	CG15445-PB	30	40	M	A	CG15445-PC	2	12	M	A	CG15445-PD	30	40	M	A
Ace	SQPLKFYFDFLNQSSR	CG1681-PA	2	17	M	A	COF.SCX.MEM,COF.SCX.NUC
Ace	SQQPVAFLTR	CG16784-PB	2	11	M	R	SG.extract,COF.SAX.CYT,COF.SCX.CYT,COF.SCX.MEM,COF.SCX.NUC	CG16784-PC	2	11	M	R
Ace	SQTASTTQSVTAAPAGGSR	CG31638-PA	2	20	M	R	COF.SAX.CYT
Ace	SQVSTLIDVDKPLFDLSTFAGR	CG6812-PA	2	23	M	F	SG.KcM,SG.chr
Ace	SSALNAKELLIR	CG14985-PA	2	13	M	A	COF.SAX.CYT,COF.SCX.CYT,COF.SCX.NUC
Ace	SSASNNGPSADQSVQDLQMEVER	CG6605-PA	2	24	M	L	COF.SCX.CYT,COF.SCX.MEM
Ace	SSDANTAVLR	CG6835-PA	2	11	M	N	COF.SAX.CYT,COF.SCX.CYT,COF.SCX.MEM,COF.SCX.NUC	CG6835-PC	2	11	M	N	CG6835-PD	2	11	M	N	CG32495-PB	2	11	M	N
Ace	SSEDPSCVAVALR	CG8590-PA	2	14	M	V	COF.SCX.CYT,COF.SCX.MEM,COF.SCX.NUC
Ace	SSEELAPINEQDFKDLKER	CG32485-PA	2	20	M	M	SG.KcC,COF.SCX.CYT,COF.SCX.MEM,COF.SCX.NUC
Ace	SSEETKTFTR	CG2140-PB	2	11	M	A	COF.SAX.CYT,COF.SCX.CYT,COF.SCX.MEM,COF.SCX.NUC
Ace	SSENSEYYSDKEEDSVVNNSSLGR	CG2684-PA	2	25	M	S	SG.KcM,SG.chr
Ace	SSEVSSDNPIYGPFFGVMGAASAIIFSALGAAYGTAK	CG3161-PA	2	38	M	S	SG.Golgi,SG.KcNR,SG.Mito	CG3161-PB	2	38	M	S	CG3161-PC	2	38	M	S	CG3161-PD	2	38	M	S
Ace	SSFVLDKEAFVR	CG1828-PA	2	13	M	R	COF.SAX.CYT,COF.SCX.CYT,COF.SCX.MEM,COF.SCX.NUC	CG1828-PB	2	13	M	R
Ace	SSGDFGNPLR	CG6601-PA	2	11	M	K	SG.chr,COF.SCX.CYT,COF.SCX.NUC
Ace	SSGFVTEAEATEQR	CG14480-PA	2	15	M	Q	COF.SCX.CYT,COF.SCX.MEM
Ace	SSGKHLAKGSPKPVLPDDGVLR	CG6776-PA	2	23	M	L	COF.SAX.CYT
Ace	SSGQQLMADSPACSSSDHSPLAKKR	CG1782-PA	2	26	M	R	COF.SAX.CYT
Ace	SSGTFVDRIDPFAKR	CG5643-PA	2	16	M	S	SG.KcC	CG5643-PB	2	16	M	S	CG5643-PC	2	16	M	S	CG5643-PD	2	16	M	S	CG5643-PE	2	16	M	S	CG5643-PF	2	16	M	S	CG5643-PG	2	16	M	S
Ace	SSIESLSIQGIR	CG6339-PA	2	13	M	S	COF.SCX.CYT,COF.SCX.MEM
Ace	SSKPQYTLSEVDGDLFSAPK	CG33054-PA	2	21	M	T	SG.KcGel	CG33054-PB	22	41	M	T
Ace	SSKSLFDSEEDAAQANKLSR	CG17734-PA	2	21	M	K	COF.SCX.MEM,COF.SCX.NUC	CG17734-PB	2	21	M	K
Ace	SSLKLQKR	CG2746-PA	2	9	M	L	COF.SAX.CYT,COF.SCX.CYT,COF.SCX.MEM,COF.SCX.NUC	CG2746-PB	2	9	M	L
Ace	SSNEAYHEPGAGGDGPGGSSGASGGGSQR	CG3671-PA	2	30	M	S	SG.KcM,SG.chr	CG3671-PB	2	30	M	S	CG3671-PC	2	30	M	S
Ace	SSNHRPLDDSDILLIQTIR	CG9437-PA	2	20	M	E	SG.extract,SG.chr
Ace	SSNNQSSSVAQAATSAR	CG9842-PA	2	18	M	T	COF.SAX.CYT,COF.SCX.CYT
Ace	SSNQEQSPAAVAAAVASCR	CG12237-PA	2	20	M	L	COF.SCX.CYT
Ace	SSNSLFETDEDVAQANKLSR	CG11825-PA	2	21	M	K	COF.SCX.MEM,COF.SCX.NUC
Ace	SSQHKVYVTRPDVDDSGLELLR	CG1236-PA	24	45	M	K	COF.SAX.CYT
Ace	SSQYSNVENLSPQTIR	CG8188-PA	2	17	M	Q	COF.SCX.CYT,COF.SCX.NUC
Ace	SSSEPPPRYEPPVEPVNGIVQPPVIPPAERPGR	CG2252-PA	2	34	M	N	SG.chr	CG2252-PB	2	34	M	N	CG2252-PC	2	34	M	N	CG2252-PD	2	34	M	N	CG2252-PE	2	34	M	N
Ace	SSSKLSPR	CG9752-PA	2	9	M	E	COF.SAX.CYT
Ace	SSSTPAYYNADAVR	CG4872-PA	2	15	M	Q	COF.SAX.CYT,COF.SCX.CYT,COF.SCX.NUC
Ace	SSTQEKPEELDR	CG1968-PA	2	13	M	I	COF.SAX.CYT,COF.SCX.CYT,COF.SCX.MEM,COF.SCX.NUC	CG1968-PB	2	13	M	I
Ace	SSTSTAAANAAPAKTEVR	CG10415-PA	2	19	M	Y	COF.SCX.CYT,COF.SCX.NUC
Ace	SSVNPEYDYLFK	CG3320-PA	2	13	M	L	SG.Golgi	CG3320-PB	2	13	M	L
Ace	STASSSNSSGEEANKK	CG10960-PB	2	17	M	S	SG.KcM
Ace	STDDLLVR	CG31064-PA	2	9	M	R	COF.SCX.MEM	CG31064-PB	2	9	M	R
Ace	STDIATQLKGSR	CG5785-PB	2	13	M	S	COF.SCX.MEM
Ace	STEDFYLR	CG9401-PA	2	9	M	Y	COF.SAX.CYT,COF.SCX.MEM,COF.SCX.NUC
Ace	STEESSPDSEYTSAVPVDCR	CG4199-PA	2	21	M	V	COF.SCX.CYT	CG4199-PB	43	62	M	V	CG4199-PC	43	62	M	V	CG4199-PD	43	62	M	V	CG4199-PE	97	116	M	V	CG4199-PF	115	134	M	V
Ace	STEPSVAKDAVLKR	CG8005-PA	2	15	M	S	COF.SAX.CYT,COF.SCX.CYT,COF.SCX.MEM
Ace	STESAKPALSQEAIVAQFQQLR	CG6302-PA	2	23	M	N	SG.KcC,SG.KcGel,SG.extract,SG.chr,COF.SCX.CYT,COF.SCX.NUC
Ace	STFGAEVDQVWPAVTGDSPHLTNFGR	CG2909-PA	2	27	M	K	SG.chr
Ace	STFVVKLLQR	CG3448-PB	2	11	M	S	COF.SAX.CYT,COF.SCX.NUC
Ace	STIEFETIGSR	CG4353-PA	2	12	M	L	COF.SCX.MEM	CG4353-PC	2	12	M	L
Ace	STIGTGYDLSASQFSPDGR	CG1519-PA	2	20	M	V	COF.SCX.CYT,COF.SCX.MEM,COF.SCX.NUC	CG1519-PB	2	20	M	V
Ace	STILEKISAIESEMAR	CG8340-PA	2	17	M	T	COF.SCX.CYT,COF.SCX.MEM,COF.SCX.NUC
Ace	STKAELACVYASLILVDDDVAVTGEKINTILK	CG4087-PA	2	33	M	A	SG.KcC,SG.KcN,SG.KcNR
Ace	STLASPLSIAGTR	CG5374-PA	2	14	M	Q	COF.SAX.CYT,COF.SCX.CYT,COF.SCX.MEM,COF.SCX.NUC	CG5374-PB	2	14	M	Q
Ace	STLELCEKYFGTR	CG6693-PA	2	14	M	D	COF.SCX.CYT,COF.SCX.NUC
Ace	STNAAIDLALDR	CG3931-PA	2	13	M	V	COF.SCX.CYT,COF.SCX.MEM,COF.SCX.NUC
Ace	STPLEQQTEER	CG10343-PA	2	12	M	E	COF.SCX.CYT,COF.SCX.MEM,COF.SCX.NUC
Ace	STQKVEYDAALGGR	CG32763-PA	2	15	M	V	COF.SCX.MEM
Ace	STQQQQLDYIER	CG5126-PA	2	13	M	H	COF.SCX.MEM,COF.SCX.NUC
Ace	STSGAVDQYTVLTGDR	CG15191-PA	2	17	M	S	COF.SCX.CYT,COF.SCX.MEM,COF.SCX.NUC
Ace	STTEAPDALVEQVR	CG8892-PA	2	15	M	E	COF.SAX.CYT,COF.SCX.CYT	CG8892-PB	2	15	M	E	CG8892-PC	2	15	M	E
Ace	STTSVVQQFVNGLKSR	CG5092-PA	2	17	M	N	COF.SCX.MEM
Ace	STVDKEELVQK	CG17870-PA	2	12	M	A	SG.KcGel,SG.KcM,SG.extract,COF.SAX.CYT,COF.SCX.CYT,COF.SCX.MEM,COF.SCX.NUC	CG17870-PB	2	12	M	A	CG17870-PC	2	12	M	A	CG17870-PD	2	12	M	A	CG17870-PE	2	12	M	A	CG17870-PF	2	12	M	A	CG17870-PG	2	12	M	A	CG17870-PH	2	12	M	A
Ace	STVSDPNSSNPPESAGNIRPEPIFR	CG9060-PA	2	26	M	E	SG.chr,COF.SAX.CYT
Ace	SVDVIDNDCNK	CG9765-PA	983	993	M	T	SG.extract	CG9765-PB	947	957	M	T	CG9765-PC	1065	1075	M	T	CG9765-PD	1050	1060	M	T	CG9765-PE	2	12	M	T	CG9765-PF	2	12	M	T	CG9765-PG	2	12	M	T
Ace	SVEEEVFR	CG3710-PA	2	9	M	I	COF.SAX.CYT,COF.SCX.CYT,COF.SCX.MEM,COF.SCX.NUC
Ace	SVEVDFVDKK	CG4173-PA	2	11	M	E	SG.KcC,SG.chr
Ace	SVGVLAGKVALVTGAGSGIGR	CG3603-PA	2	22	M	A	COF.SAX.CYT
Ace	SVHSPNPGLILQSKR	CG13343-PA	2	16	M	F	COF.SAX.CYT
Ace	SVIGIDFGNESCYVAAAR	CG6603-PA	2	19	M	S	COF.SAX.CYT,COF.SCX.CYT,COF.SCX.NUC	CG6603-PB	2	19	M	S	CG6603-PC	2	19	M	S
Ace	SVLEQLGALDIGTNEQVDETLQR	CG7456-PA	2	24	M	I	COF.SCX.CYT
Ace	SVLPNAGNNESSVTAPKMFGDPDLDR	CG31229-PA	2	27	M	M	COF.SCX.MEM
Ace	SVPFSGALR	CG33184-PA	2	10	M	R	COF.SCX.MEM,COF.SCX.NUC
Ace	SVSSNASSASNK	CG10641-PA	2	13	M	D	SG.KcC,SG.extract
Ace	SYAADVLNSAHLELHGGGDAELR	CG8553-PA	2	24	M	R	SG.KcGel,SG.extract,SG.chr	CG8553-PB	2	24	M	R
Ace	SYHKPEAKTVQDLKDLAQKLR	CG8036-PB	2	22	M	I	COF.SAX.CYT	CG8036-PC	2	22	M	I
Ace	SYKVEPLPDSYAGLGEGPHWDVAR	CG1803-PA	2	25	M	Q	SG.KcC,SG.KcNR	CG1803-PB	2	25	M	Q	CG1803-PC	2	25	M	Q	CG1803-PD	18	41	M	Q
Ace	SYTELESGYQDISQQHQQQNPHQSQPQQR	CG14616-PA	2	30	M	V	SG.KcC,SG.chr	CG14616-PC	2	30	M	V	CG14616-PD	2	30	M	V	CG14616-PE	2	30	M	V
Ace	TAVEPATKKKR	CG1785-PA	2	12	M	I	COF.SAX.CYT
Ace	TDGEQQEALVKR	CG8085-PA	2	13	M	A	COF.SCX.CYT,COF.SCX.MEM,COF.SCX.NUC	CG8085-PB	2	13	M	A	CG8085-PC	2	13	M	A
Ace	TDPSKLAVAVVCSSNMNR	CG14216-PA	2	19	M	S	COF.SAX.CYT,COF.SCX.CYT,COF.SCX.NUC
Ace	TDSLEYNDINAEVR	CG4817-PA	2	15	M	G	COF.SAX.CYT,COF.SCX.CYT,COF.SCX.MEM,COF.SCX.NUC
Ace	TEAAEINGR	CG9922-PA	2	10	M	E	SG.KcM,COF.SCX.CYT
Ace	TEAAGATNPGGAAGDAESYGKEMALQSGR	CG6230-PA	2	30	M	P	COF.SCX.MEM
Ace	TEDEQINLR	CG5725-PB	2	10	M	N	COF.SAX.CYT
Ace	TEEADFSEQITDGKNKSNVR	CG7787-PA	2	21	M	C	COF.SCX.CYT,COF.SCX.MEM,COF.SCX.NUC
Ace	TEESKKIVQLDDVQR	CG8003-PA	2	16	M	Q	SG.KcC,COF.SAX.CYT,COF.SCX.CYT,COF.SCX.MEM,COF.SCX.NUC
Ace	TELGMELESVR	CG8293-PA	2	12	M	L	COF.SAX.CYT,COF.SCX.CYT,COF.SCX.MEM,COF.SCX.NUC	CG8293-PB	2	12	M	L
Ace	TEQKNQVTR	CG8500-PA	2	10	M	A	COF.SCX.CYT
Ace	TEQSIIGAR	CG15112-PA	2	10	M	A	COF.SCX.CYT,COF.SCX.NUC	CG15112-PC	2	10	M	A
Ace	TESVELMNKYGEPLR	CG11880-PA	2	16	M	Y	COF.SCX.MEM,COF.SCX.NUC	CG11880-PB	2	16	M	Y	CG11880-PC	2	16	M	Y
Ace	TETFDEELFETR	CG15160-PA	2	13	M	L	COF.SCX.CYT,COF.SCX.MEM
Ace	TEVEQPPQNGIDPTAGEDDDNSKAR	CG9325-PA	2	26	M	P	COF.SCX.CYT,COF.SCX.MEM	CG9325-PB	2	26	M	P	CG9325-PC	2	26	M	P	CG9325-PD	2	26	M	P	CG9325-PE	2	26	M	P	CG9325-PF	2	26	M	P
Ace	THPLEAPQR	CG2006-PA	2	10	M	S	COF.SAX.CYT
Ace	TMAGQTINDR	CG2520-PA	2	11	M	L	COF.SAX.CYT,COF.SCX.NUC
Ace	TMDATALPSELLVTPQPLVGFCGLDTAR	CG17569-PA	2	29	M	V	COF.SCX.CYT,COF.SCX.MEM	CG17569-PB	2	29	M	V
Ace	TMPNGLDDQEKLLAEAIGLAR	CG5625-PA	2	22	M	K	COF.SCX.CYT	CG5625-PB	21	41	R	K
Ace	TNATDIGANDVEMEVDPTAETLADEKK	CG10484-PA	2	28	M	N	SG.chr
Ace	TNEDVGTNSVADR	CG9099-PA	2	14	M	L	COF.SAX.CYT,COF.SCX.CYT,COF.SCX.MEM,COF.SCX.NUC
Ace	TNLAPTIR	CG9436-PA	2	9	M	L	COF.SAX.CYT,COF.SCX.CYT
Ace	TNNDAAVEAAGSSR	CG5412-PA	2	15	M	A	COF.SAX.CYT,COF.SCX.CYT
Ace	TNTDLKALELMFQR	CG5779-PA	2	15	M	P	COF.SCX.CYT
Ace	TQAEIVKCLR	CG4510-PA	2	11	M	E	COF.SCX.NUC
Ace	TQMSDEQFR	CG13941-PA	2	10	M	I	COF.SCX.CYT,COF.SCX.MEM,COF.SCX.NUC
Ace	TQMSQDEIITNTKTVLQGLEALR	CG5433-PA	2	24	M	V	COF.SCX.CYT,COF.SCX.NUC
Ace	TQVFINGAR	CG8360-PA	2	10	M	D	COF.SAX.CYT,COF.SCX.NUC
Ace	TSHPVFIDLSLDEQVQELR	CG8309-PA	2	20	M	K	SG.extract,SG.chr
Ace	TSKLLPGNIVYGGPVTER	CG6178-PA	2	19	M	Q	COF.SCX.NUC
Ace	TSPAAAAAGAALAAGAPYR	CG32423-PA	2	20	M	G	COF.SAX.CYT,COF.SCX.CYT,COF.SCX.NUC	CG32423-PB	2	20	M	G	CG32423-PD	2	20	M	G
Ace	TSPSRDINDLFDDIVLTEEKEAR	CG33154-PA	2	24	M	L	SG.KcC
Ace	TSSETSASAFSSSDTAALER	CG7265-PA	2	21	M	Q	COF.SAX.CYT,COF.SCX.CYT,COF.SCX.MEM,COF.SCX.NUC
Ace	TSTELKIGLTTSAR	CG1943-PA	2	15	M	P	COF.SCX.CYT,COF.SCX.NUC	CG1943-PB	2	15	M	P	CG1943-PC	2	15	M	P
Ace	TTAALKR	CG10688-PA	2	8	M	D	SG.KcC,COF.SAX.CYT,COF.SCX.CYT
Ace	TTAFDAAHTEGPGFVGIR	CG3284-PA	2	19	M	F	SG.KcGel,SG.extract,SG.chr
Ace	TTALYLPEENIDMIAATSVLQQQAADIR	CG17332-PA	2	29	M	T	COF.SCX.CYT,COF.SCX.MEM	CG17332-PB	2	29	M	T	CG17332-PD	2	29	M	T
Ace	TTAQHQHYTVEVGDTNFTIHSR	CG5680-PB	2	23	M	Y	SG.KcC,SG.chr
Ace	TTAVLGGGLSGLSAGYYLLR	CG5796-PA	2	21	M	R	COF.SCX.NUC
Ace	TTDESIMEEMLER	CG3002-PB	2	14	M	A	COF.SCX.CYT
Ace	TTDISIVR	CG5870-PA	2	9	M	W	COF.SAX.CYT,COF.SCX.MEM
Ace	TTILDNFQR	CG10498-PA	2	10	M	A	COF.SCX.CYT	CG10498-PB	2	10	M	A
Ace	TTPSTSVGDAAAALSGNLQLPPLR	CG10373-PA	2	25	M	T	COF.SCX.MEM,COF.SCX.NUC
Ace	TTSIPQGTLLDVLK	CG4898-PA	2	15	M	K	SG.KcGel,SG.extract,COF.SCX.NUC	CG4898-PB	88	101	M	K
Ace	TTSSEDVLLQMGEVR	CG8151-PA	2	16	M	Y	COF.SCX.CYT,COF.SCX.MEM	CG8151-PB	2	16	M	Y	CG8151-PC	2	16	M	Y
Ace	TTSTIKPTGGDEVPPAGVVGNVADVGVAASLTK	CG32699-PA	2	34	M	R	SG.chr
Ace	TTTENVSTER	CG3057-PA	2	11	M	K	COF.SCX.MEM,COF.SCX.NUC	CG3057-PB	2	11	M	K	CG3057-PC	2	11	M	K	CG3057-PD	2	11	M	K
Ace	TTYEEFIQQNEDR	CG1250-PA	2	14	M	D	SG.chr,COF.SCX.CYT,COF.SCX.MEM,COF.SCX.NUC	CG1250-PB	2	14	M	D
Ace	TTYFNYPSKELQDELR	CG6058-PA	35	50	M	E	SG.KcC,SG.KcNR,COF.SCX.CYT,COF.SCX.NUC	CG6058-PB	2	17	M	E	CG6058-PC	2	17	M	E	CG6058-PD	2	17	M	E	CG6058-PE	2	17	M	E	CG6058-PF	35	50	M	E	CG6058-PG	35	50	M	E	CG6058-PH	2	17	M	E
Ace	VDEQLSAALR	CG17514-PA	2	11	M	D	COF.SCX.CYT,COF.SCX.MEM,COF.SCX.NUC
Ace	VDFYYLPGSSPCR	CG10045-PA	2	14	M	S	COF.SCX.CYT,COF.SCX.MEM,COF.SCX.NUC
Ace	VDKIEMSLDDIIK	CG1101-PA	2	14	M	S	SG.KcGel,SG.extract,SG.chr,COF.SCX.CYT,COF.SCX.MEM,COF.SCX.NUC
Ace	VDRSDNAAESFDDAVEER	CG4236-PA	2	19	M	V	SG.KcC,SG.KcM
Ace	VDTNSSNPGIVGGNSASSAR	CG13907-PA	2	21	M	L	COF.SCX.NUC
Ace	VDYYKILDVSR	CG8448-PA	2	12	M	S	COF.SCX.NUC	CG8448-PB	2	12	M	S	CG8448-PC	2	12	M	S	CG8448-PD	2	12	M	S
Ace	VEPIFEYQFR	CG12156-PA	2	11	M	L	COF.SCX.CYT,COF.SCX.MEM,COF.SCX.NUC
Ace	VESDGTADATR	CG6359-PA	3	13	M	R	COF.SCX.CYT,COF.SCX.MEM,COF.SCX.NUC
Ace	VLSNEEQEFIKR	CG12859-PA	2	13	M	K	COF.SCX.MEM,COF.SCX.NUC
Ace	VNFTVDEIR	CG2238-PA	2	10	M	G	SG.KcC,SG.KcM,SG.KcNR,SG.extract,SG.chr,COF.SAX.CYT,COF.SCX.CYT,COF.SCX.MEM,COF.SCX.NUC
Ace	VNNTVDTEATEIR	CG31641-PC	2	14	M	C	COF.SCX.CYT,COF.SCX.MEM,COF.SCX.NUC
Ace	VRPNNNQLPENLPQLQNLIKR	CG8070-PA	2	22	M	D	COF.SAX.CYT
Ace	VSMQFVLQPLPGSDDQFIER	CG9484-PA	2	21	M	I	COF.SAX.CYT,COF.SCX.CYT
Ace	VTMENSDEIMQILER	CG2890-PA	2	16	M	F	COF.SCX.CYT	CG2890-PB	2	16	M	F	CG2890-PC	2	16	M	F
free	AAGADTQLEHMCR	CG7070-PA	23	35	M	L	SG.KcM,SG.extract,SG.chr,COF.SAX.CYT	CG7070-PB	2	14	M	L
free	AAHKSFR	CG3997-PA	2	8	M	I	COF.SAX.CYT
free	AAYTEDQLAEFQEAFNLFDNR	CG3201-PA	2	22	M	G	SG.Golgi,SG.KcGel,SG.KcNR,SG.extract,SG.chr,COF.SCX.CYT
free	ADSKGEDLATAILKR	CG2331-PA	2	16	M	K	COF.SAX.CYT
free	AEFEEDLPHNGLMDGIASGVGVPVEALR	CG9655-PA	2	29	M	L	SG.KcM,SG.chr	CG9655-PB	2	29	M	L	CG9655-PC	2	29	M	L
free	AEGNGELLDDINQKADDR	CG17838-PA	36	53	M	G	COF.SAX.CYT,COF.SCX.CYT	CG17838-PB	2	19	M	G	CG17838-PC	2	19	M	G	CG17838-PD	44	61	M	G	CG17838-PE	44	61	M	G	CG17838-PF	2	19	M	G
free	AFGDYPAEYNPK	CG4692-PA	2	13	M	V	SG.KcM,SG.extract	CG4692-PB	2	13	M	V
free	AGEGEKLTGLSKIFNGTTMSGR	CG15304-PA	2	23	M	A	COF.SCX.MEM,COF.SCX.NUC
free	AGGKAGKDSGKAKAKAVSR	CG5499-PA	2	20	M	S	COF.SAX.CYT
free	AGSGAPIPELTEITDNVQR	CG3835-PA	53	71	M	G	COF.SCX.MEM,COF.SCX.NUC	CG3835-PB	53	71	M	G	CG3835-PC	53	71	M	G
free	AKSKNHTNHNQNKKAHR	CG10071-PA	2	18	M	N	COF.SAX.CYT	CG10071-PB	2	18	M	N	CG10071-PC	2	18	M	N
free	AKTKKNVR	CG16753-PA	2	9	M	A	COF.SAX.CYT
free	ALETEAKNSNATATGDATATATK	CG8443-PA	2	24	M	A	SG.KcC
free	AMSKVIR	CG6562-PA	2	8	M	V	COF.SAX.CYT,COF.SCX.NUC, SG.KcM	CG6562-PB	2	8	M	V
free	ANGSATEAAATANPQQR	CG11238-PA	2	18	M	I	COF.SAX.CYT
free	ANTPATSSAGPVLR	CG14028-PA	2	15	M	G	SG.KcM,SG.chr,COF.SCX.MEM,COF.SCX.NUC
free	APNAAVPVER	CG3140-PA	2	11	M	Y	COF.SAX.CYT,COF.SCX.CYT,COF.SCX.MEM,COF.SCX.NUC
free	APPSYSDLGK	CG6647-PA	2	11	M	Q	SG.KcM,SG.chr,COF.SCX.MEM,COF.SCX.NUC	CG6647-PB	2	11	M	Q
free	AQKKAVTVKGKKATNGEEKPLAKR	CG2050-PA	2	25	M	V	COF.SAX.CYT
free	ASEVEKSQTAAASEDTIFGKILR	CG2862-PA	26	48	M	K	COF.SCX.CYT,COF.SCX.NUC	CG2862-PB	2	24	M	K
free	ASISLLNPKAEFAR	CG8231-PA	2	15	M	A	COF.SAX.CYT,COF.SCX.CYT,COF.SCX.MEM,COF.SCX.NUC
free	ASLSETLR	CG8111-PA	2	9	M	S	COF.SCX.MEM
free	ASNIFAAEKDNGVKNNGDAPR	CG31363-PA	44	64	M	R	SG.KcC,COF.SAX.CYT,COF.SCX.CYT,COF.SCX.NUC	CG31363-PC	50	70	M	R	CG31363-PD	44	64	M	R
free	ASPVELLSLSNPVFK	CG1742-PA	2	16	M	S	SG.Golgi,SG.KcM
free	ASTTPVEPKKADKPTVR	CG12079-PA	34	50	M	Q	COF.SCX.MEM
free	ATALKEASEKLR	CG4307-PA	85	96	M	F	COF.SCX.MEM	CG4307-PB	2	13	M	F
free	ATKLNVNIR	CG14181-PA	2	10	M	T	COF.SAX.CYT
free	ATKVTSLGGDEVGSGTGIGQITGGVR	CG8728-PA	25	50	M	T	COF.SCX.MEM,COF.SCX.NUC
free	ATLKMISIR	CG7610-PA	27	35	M	L	COF.SCX.MEM,COF.SCX.NUC	CG7610-PB	27	35	M	L	CG7610-PC	27	35	M	L
free	AVTTGSTSEATTTTTPVPR	CG6608-PA	2	20	M	R	SG.chr,COF.SCX.MEM,COF.SCX.NUC	CG6608-PB	2	20	M	R
free	CKAGFAGDDAPR	CG4027-PA	18	29	M	A	COF.SAX.CYT,COF.SCX.CYT,COF.SCX.MEM	CG4027-PB	18	29	M	A	CG5178-PA	18	29	M	A	CG7478-PA	18	29	M	A	CG10067-PA	18	29	M	A	CG12051-PA	18	29	M	A	CG18290-PA	18	29	M	A	CG18290-PB	18	29	M	A
free	CKSLEQQGISVDLAGR	CG8266-PA	709	724	M	F	COF.SCX.CYT	CG8266-PB	710	725	M	F
free	CLQDFPSQVVER	CG5972-PA	21	32	M	H	COF.SCX.CYT,COF.SCX.NUC
free	CSETSGFFR	CG9579-PA	142	150	M	R	COF.SCX.CYT
free	GALAELAGDEKNGEGSR	CG10685-PA	2	18	M	T	SG.KcC,COF.SAX.CYT,COF.SCX.CYT,COF.SCX.MEM,COF.SCX.NUC
free	GFATLWYSHPR	CG8495-PA	2	12	M	K	SG.KcC,SG.extract,SG.chr,COF.SAX.CYT
free	GFDIDSQKICSDLESSDR	CG31320-PA	2	19	M	R	COF.SCX.CYT
free	GFVKVVKNKQYFKR	CG17489-PA	2	15	M	Y	COF.SAX.CYT,COF.SCX.MEM,COF.SCX.NUC	CG17489-PB	2	15	M	Y	CG17489-PD	2	15	M	Y	CG17489-PE	2	15	M	Y
free	GGHDNWNNGQNEEQDDSITEPEHMR	CG9983-PE	2	26	M	K	SG.chr
free	GGKKKVHPKTR	CG5786-PA	2	12	M	T	COF.SAX.CYT
free	GGKTKQAPR	CG32210-PA	2	10	M	T	COF.SAX.CYT
free	GGKYKIVMVR	CG1721-PA	2	11	M	H	COF.SAX.CYT,COF.SCX.CYT,COF.SCX.MEM,COF.SCX.NUC
free	GGSSYDVLR	CG7700-PA	2	10	M	K	COF.SCX.CYT,COF.SCX.MEM
free	GIDINHKYDR	CG8615-PA	2	11	M	K	SG.KcC,COF.SAX.CYT
free	GIEKILPCTLR	CG9285-PA	2	12	M	L	COF.SAX.CYT,COF.SCX.CYT,COF.SCX.NUC	CG9285-PB	2	12	M	L	CG9285-PC	2	12	M	L
free	GIFGQSSPFDADVEK	CG6521-PA	2	16	M	A	SG.KcGel,SG.KcM
free	GILEKIAEIER	CG6195-PA	2	12	M	E	COF.SAX.CYT,COF.SCX.CYT
free	GKDFDAVGFVK	CG16944-PA	2	12	M	D	SG.Golgi,SG.KcM,SG.KcNR,SG.extract,SG.chr	CG16944-PB	2	12	M	D	CG16944-PC	15	25	M	D	CG16944-PD	15	25	M	D
free	GKDFYKILGLER	CG10578-PA	2	13	M	K	COF.SCX.CYT,COF.SCX.MEM,COF.SCX.NUC	CG10578-PB	2	13	M	K
free	GKDYYKILGIER	CG7130-PA	2	13	M	N	COF.SCX.CYT
free	GKFEYSLGLNELK	CG7777-PA	2	14	M	S	SG.Golgi,SG.KcM,SG.KcNR,SG.Mito	CG7777-PB	2	14	M	S
free	GKKNKGGAPNLGR	CG14788-PA	2	14	M	Q	COF.SAX.CYT
free	GKKTKVGKTR	CG8939-PA	2	11	M	K	COF.SAX.CYT
free	GKLTLYGIDGSPPVR	CG17524-PA	2	16	M	S	COF.SCX.CYT,COF.SCX.NUC
free	GKLVLYGVEASPPVR	CG17534-PA	2	16	M	A	COF.SCX.CYT,COF.SCX.NUC
free	GKVKVER	CG5258-PA	2	8	M	S	COF.SAX.CYT
free	GLLSDPSISTQSKLVDGLAR	CG3033-PA	2	21	M	H	COF.SCX.MEM
free	GLTISSLLTR	CG11027-PA	2	11	M	L	COF.SAX.CYT
free	GQKDSYVGDEAQSKR	CG4027-PA	49	63	M	G	COF.SAX.CYT,COF.SCX.MEM	CG4027-PB	49	63	M	G	CG5178-PA	49	63	M	G	CG10067-PA	49	63	M	G	CG12051-PA	49	63	M	G	CG18290-PA	49	63	M	G	CG18290-PB	49	63	M	G
free	GQLTFEDDCLIR	CG5640-PA	2	13	M	E	COF.SCX.MEM
free	GRLGVVDPSSYSQPDLITTEHSALNWK	CG10602-PA	73	99	M	I	SG.KcC	CG10602-PB	2	28	M	I	CG10602-PC	2	28	M	I	CG10602-PD	2	28	M	I
free	GRLILEHTLQGHK	CG12797-PA	2	14	M	G	SG.KcC
free	GSGKQQKVQSSGFTKEEELLLQDFSR	CG5885-PA	2	27	M	N	COF.SCX.NUC
free	GSLEKLKQLR	CG4729-PA	2	11	M	L	COF.SCX.MEM,COF.SCX.NUC	CG4729-PB	2	11	M	L	CG4729-PC	2	11	M	L
free	GSQTLEILR	CG3443-PB	2	10	M	Q	COF.SCX.MEM
free	GTLLISKIR	CG3401-PA	154	162	M	E	COF.SAX.CYT	CG4869-PA	148	156	L	E	CG9277-PA	157	165	M	E	CG9277-PB	148	156	M	E	CG9277-PC	76	84	M	E	CG9277-PD	76	84	M	E	CG9359-PA	148	156	M	E
free	GVASMLQIDEMLGDFNR	CG2358-PA	2	18	M	M	SG.chr,COF.SCX.MEM,COF.SCX.NUC
free	GVLDNIALHFTGDASR	CG15012-PB	2	17	M	N	SG.Golgi,SG.KcNR,SG.Mito
free	GVPAGDVEKGKKLFVQR	CG17903-PA	2	18	M	C	COF.SCX.CYT,COF.SCX.NUC
free	GVQVVPIAPGDGSTYPK	CG11001-PA	2	18	M	N	SG.Golgi,SG.KcC,SG.KcGel,SG.KcM,SG.KcN,SG.Mito
free	MAMAPNLTVLVGDTVGAR	CG10206-PA	281	298	M	L	SG.chr,COF.SAX.CYT
free	MANVVNMNSLLNGK	CG33197-PA	1	14	-	D	SG.Golgi	CG33197-PB	1	14	-	D	CG33197-PC	1	14	-	D	CG33197-PD	1	14	-	D
free	MATHLETTANLLK	CG1963-PA	180	192	R	-	SG.KcC
free	MDADKQLER	CG3312-PA	1	9	-	Q	COF.SAX.CYT,COF.SCX.CYT,COF.SCX.MEM,COF.SCX.NUC	CG3312-PB	1	9	-	Q
free	MDKDWQAQIERDLQEAQATALPDEDEEL	CG1404-PA	189	216	K	-	SG.KcC	CG1404-PB	189	216	K	-
free	MDNCDQDASFR	CG4380-PA	1	11	-	L	COF.SCX.CYT
free	MDTAEIEADQR	CG10042-PA	1	11	-	A	SG.chr	CG10042-PB	89	99	K	A
free	MDTKLEAR	CG15240-PA	1	8	-	G	COF.SAX.CYT
free	MEDAEQADEEDEEEEEAAPSVSSK	CG10223-PA	1078	1101	K	A	SG.KcM,SG.chr
free	MEEYEAQLLVVEQALENAADDAQR	CG4709-PA	1	24	-	Q	COF.SCX.CYT
free	MEGEGAGLAR	CG2093-PA	1387	1396	L	F	COF.SAX.CYT
free	MEHHEDNAQLDNYLQNR	CG1483-PA	1	17	-	L	SG.KcC,SG.KcM,COF.SAX.CYT	CG1483-PB	1	17	-	L
free	MELPQRAR	CG1915-PC	11830	11837	E	R	COF.SAX.CYT
free	MEMLVLDEADR	CG5800-PA	219	229	T	C	COF.SCX.MEM,COF.SCX.NUC
free	MEMSLNPVR	CG7033-PA	1	9	-	V	SG.extract,COF.SAX.CYT,COF.SCX.CYT,COF.SCX.MEM,COF.SCX.NUC
free	MESNSSEMEGNGGKIAETAPTNDSSPSLNILCAICNEFFR	CG10916-PA	1	40	-	A	SG.extract
free	MFGGQQPILVLSQNTKR	CG8977-PA	1	17	-	E	COF.SAX.CYT,COF.SCX.CYT,COF.SCX.MEM,COF.SCX.NUC	CG8977-PB	1	17	-	E
free	MFKLSELVR	CG32530-PA	1	9	-	W	COF.SCX.MEM
free	MFMPKAHR	CG14206-PB	1	8	-	V	COF.SAX.CYT	CG14206-PC	1	8	-	V
free	MFTLEQLFR	CG10275-PA	952	960	E	N	COF.SCX.CYT
free	MFVLAELKDNVR	CG7339-PA	1	12	-	I	COF.SAX.CYT,COF.SCX.CYT
free	MFVLYETPAGYAIFK	CG10206-PA	1	15	-	L	SG.extract
free	MFYLIGLGLGDLKDITVK	CG31289-PA	1	18	-	G	SG.KcC
free	MGAAGMAPEPALR	CG7635-PA	31	43	N	V	COF.SCX.MEM
free	MGIEILSFTIK	CG32593-PA	158	168	R	D	SG.Golgi	CG32593-PB	145	155	R	D	CG32593-PC	121	131	R	D	CG32593-PD	1	11	-	D	CG32593-PE	158	168	R	D	CG32593-PF	145	155	R	D
free	MGQVVEADILGDEWK	CG10944-PA	1	15	-	G	SG.KcNR,SG.extract,SG.chr	CG10944-PB	32	46	R	G	CG10944-PC	35	49	R	G
free	MGSTDPNKVVEKIR	CG1943-PA	58	71	C	E	COF.SCX.CYT	CG1943-PB	58	71	C	E	CG1943-PC	58	71	C	E
free	MGVQVLINDPDKLEAIR	CG5374-PA	251	267	K	A	SG.KcC,SG.KcNR,SG.chr	CG5374-PB	251	267	K	A
free	MGVVSNPLDNVFTLDADF	CG8975-PA	376	393	R	-	SG.extract
free	MGYDDVITHLGEFGPYQK	CG6331-PA	1	18	-	R	SG.KcNR
free	MHKGGGDGQQAPNFGQQAGGYKGPTVEEVD	CG5436-PA	606	635	K	-	SG.KcC
free	MHLNENTKILGHR	CG11539-PA	1	13	-	V	COF.SAX.CYT
free	MHLNKYSEVVER	CG33297-PD	1	12	-	L	COF.SAX.CYT
free	MHSTLEDVQLEGMEIK	CG4365-PA	35	50	G	I	SG.KcC	CG4365-PB	1	16	-	I	CG4365-PC	78	93	G	I
free	MIADKIENEFSIGK	CG10639-PA	442	455	K	-	SG.chr
free	MIDRLQIR	CG1517-PB	1	8	-	R	COF.SAX.CYT	CG1517-PC	1	8	-	R
free	MIEITCNDR	CG3450-PA	1	9	-	L	COF.SCX.CYT,COF.SCX.NUC
free	MIGDYIDTSIR	CG1667-PA	1	11	-	I	COF.SCX.MEM
free	MIHDLLLACR	CG6176-PA	1	10	-	S	COF.SAX.CYT
free	MILLEINNR	CG10954-PA	1	9	-	I	COF.SAX.CYT,COF.SCX.CYT,COF.SCX.MEM,COF.SCX.NUC
free	MIVQQQQQQQLSNEGEPK	CG15745-PA	1	18	-	T	SG.extract	CG15745-PB	195	212	A	T
free	MKAKKKLGVGLSR	CG15433-PA	1	13	-	Q	COF.SAX.CYT
free	MKDAKPFPVLK	CG1818-PA	1	11	-	N	SG.KcC,COF.SCX.CYT,COF.SCX.MEM,COF.SCX.NUC
free	MKDTDSEEEIR	CG8472-PA	77	87	K	E	SG.KcC,SG.KcNR,SG.extract,COF.SAX.CYT	CG8472-PB	77	87	K	E
free	MKECPYGEKCYR	CG8825-PA	1	12	-	K	COF.SCX.CYT
free	MKFADVLR	CG7011-PA	1	8	-	R	COF.SCX.MEM,COF.SCX.NUC
free	MKFAIESISKNSGR	CG3434-PA	1	14	-	L	COF.SAX.CYT,COF.SCX.CYT,COF.SCX.NUC
free	MKFQYKEEHAFEK	CG32672-PA	1	13	-	R	SG.KcC,COF.SAX.CYT
free	MKHLVQR	CG1663-PA	1	7	-	H	COF.SAX.CYT
free	MKIDTCVLR	CG4584-PA	15	23	K	F	SG.KcC,SG.KcN,COF.SAX.CYT,COF.SCX.CYT,COF.SCX.NUC	CG4584-PB	1	9	-	F
free	MKIEEVKSTVR	CG4003-PA	1	11	-	T	COF.SAX.CYT,COF.SCX.CYT,COF.SCX.MEM,COF.SCX.NUC
free	MKIKLIDSVVR	CG17293-PA	1	11	-	S	COF.SAX.CYT,COF.SCX.CYT,COF.SCX.MEM,COF.SCX.NUC
free	MKINEKNLYVFAR	CG12393-PA	1	13	-	T	COF.SCX.CYT,COF.SCX.NUC	CG12393-PB	1	13	-	T
free	MKIYKDIITGDEMFADTYK	CG4800-PA	1	19	-	M	SG.KcC
free	MKKEQPKR	CG3396-PA	174	181	N	S	COF.SAX.CYT
free	MKKHEELETPTFTTYIPIDISE	CG10997-PA	239	260	K	-	SG.KcC
free	MKLIEEQNLDR	CG7319-PC	131	141	F	V	COF.SCX.MEM
free	MKLLTAKEVR	CG13391-PA	1	10	-	N	COF.SAX.CYT,COF.SCX.CYT,COF.SCX.MEM,COF.SCX.NUC	CG13391-PB	1	10	-	N
free	MKLNVSYPATGCQK	CG10944-PB	1	14	-	L	SG.KcNR
free	MKLSEGVKDR	CG8226-PA	1	10	-	L	COF.SCX.MEM
free	MKMVLSQR	CG8440-PA	1	8	-	Q	COF.SAX.CYT,COF.SCX.NUC	CG8440-PB	1	8	-	Q	CG8440-PC	1	8	-	Q	CG8440-PD	1	8	-	Q	CG8440-PE	1	8	-	Q	CG8440-PF	1	8	-	Q
free	MKNQDLVEYLR	CG3709-PA	1	11	-	S	COF.SCX.CYT,COF.SCX.NUC
free	MKPTNNSTLEVISPK	CG11143-PA	1	15	-	V	SG.KcC,SG.KcNR
free	MKQKDLKR	CG5632-PA	1	8	-	A	COF.SAX.CYT
free	MKQNPFVSSSR	CG6846-PA	1	11	-	R	SG.KcC,COF.SAX.CYT,COF.SCX.CYT,COF.SCX.MEM,COF.SCX.NUC
free	MKVEALDKFWADK	CG4912-PA	1	13	-	S	SG.KcC	CG4912-PB	1	13	-	S
free	MKVIYNTLFKR	CG8764-PA	1	11	-	T	COF.SCX.MEM,COF.SCX.NUC
free	MKVKMISR	CG7275-PA	1	8	-	N	COF.SCX.NUC
free	MKVKVER	CG15509-PA	1	7	-	T	COF.SCX.CYT
free	MLDFLTELR	CG2540-PA	1	9	-	S	COF.SCX.MEM
free	MLDMGFEPQIR	CG7878-PA	442	452	R	K	SG.KcM,SG.chr	CG9748-PA	464	474	R	R	CG10077-PA	316	326	R	K	CG10077-PB	1	11	-	K	CG10279-PA	440	450	R	K	CG10279-PB	299	309	R	K	CG10279-PC	299	309	R	K	CG10279-PD	296	306	R	K	CG10279-PE	299	309	R	K	CG10279-PF	299
free	MLEDTQLVWVR	CG5695-PA	4	14	K	D	SG.extract	CG5695-PB	1	11	-	D
free	MLELDAELMAKAQR	CG14438-PA	3200	3213	C	P	COF.SCX.MEM	CG14438-PB	3200	3213	C	P
free	MLFLKDKR	CG12321-PA	1	8	-	T	COF.SAX.CYT,COF.SCX.CYT,COF.SCX.MEM,COF.SCX.NUC
free	MLGATNPADSLPGTIR	CG2210-PA	110	125	Q	G	COF.SAX.CYT,COF.SCX.CYT,COF.SCX.NUC
free	MLINLKVKTLDAR	CG7546-PA	1	13	-	I	COF.SAX.CYT,COF.SCX.CYT,COF.SCX.MEM	CG7546-PB	1	13	-	I
free	MLPSLDTLMR	CG2991-PA	1	10	-	C	COF.SCX.MEM,COF.SCX.NUC	CG2991-PB	1	10	-	C	CG2991-PC	1	10	-	C
free	MLQGGQGPGIR	CG40290-PA	1	11	-	E	COF.SAX.CYT
free	MLQQNKVLKVIR	CG1242-PA	387	398	E	K	COF.SAX.CYT
free	MLSSLSIHQFMGVDNATVYLESHSK	CG3163-PA	344	368	K	-	SG.extract
free	MLTETPMASENIMDELASLIR	CG9749-PA	1	21	-	T	COF.SCX.CYT,COF.SCX.MEM,COF.SCX.NUC
free	MLTNFESKSAR	CG7961-PA	1	11	-	V	COF.SAX.CYT,COF.SCX.CYT,COF.SCX.MEM,COF.SCX.NUC	CG7961-PB	1	11	-	V
free	MLTWTPLESNPEVLTK	CG4265-PA	1	16	-	Y	SG.KcGel
free	MLVLVLGDLHIPHR	CG4764-PA	1	14	-	C	COF.SAX.CYT
free	MMDTNGELGEFLFDK	CG2216-PA	189	203	K	T	SG.extract,SG.chr	CG2216-PB	189	203	K	T	CG2216-PC	189	203	K	T	CG2216-PD	189	203	K	T
free	MMWKALLIAVLAIAHCQAVLETDANTLVLLDNLAIR	CG9022-PA	1	36	-	E	SG.chr
free	MNAEKLKKLQAQVR	CG3644-PA	1	14	-	I	COF.SAX.CYT,COF.SCX.CYT,COF.SCX.MEM,COF.SCX.NUC	CG3644-PB	1	14	-	I
free	MNESPVVTPTTPTGNGTPPTQTTNGNSIVATK	CG6643-PA	1	32	-	S	SG.chr	CG6643-PB	34	65	K	S
free	MNLESLFR	CG14194-PA	1	8	-	D	COF.SCX.MEM
free	MNLPAKMDVEK	CG4043-PA	1	11	-	D	SG.chr
free	MNSFVNDIFER	CG17949-PA	60	70	I	I	SG.chr	CG40461-PA	1	11	-	I
free	MPAVRLAR	CG9759-PA	50	57	E	Q	COF.SAX.CYT	CG9759-PB	50	57	E	Q
free	MPCPCGSGCK	CG9470-PA	1	10	-	C	SG.extract
free	MPSAPTHTAEEAHLLGTMPVDPMDDIELR	CG15669-PA	83	111	K	S	SG.KcC	CG15669-PB	83	111	K	S	CG15669-PC	83	111	K	S	CG15669-PD	1	29	-	S	CG15669-PE	83	111	K	S	CG15669-PF	83	111	K	S	CG15669-PI	1	29	-	S
free	MPVSAKRLLR	CG32791-PA	1	10	-	N	COF.SAX.CYT
free	MQETDTEQEATPHTIQAR	CG2863-PA	8	25	K	L	SG.KcC,SG.chr,COF.SAX.CYT
free	MQIFVKTLTGKTITLEVEPSDTIENVK	CG2960-PA	1	27	-	A	SG.KcGel	CG5271-PA	1	27	-	A	CG11624-PA	1	27	-	A	CG11624-PB	1	27	-	A	CG11624-PC	1	27	-	A	CG11700-PA	1	27	-	A	CG32744-PA	1	27	-	A
free	MQIKEFR	CG5269-PA	1	7	-	V	COF.SAX.CYT,COF.SCX.CYT,COF.SCX.MEM,COF.SCX.NUC
free	MQMAQKLDIMR	CG2903-PA	365	375	Q	K	COF.SAX.CYT	CG2903-PB	478	488	Q	K	CG2903-PC	478	488	Q	K
free	MREIVHIQAGQCGNQIGAK	CG9277-PB	1	19	-	F	SG.KcC,SG.KcN,SG.KcNR,SG.extract,SG.chr
free	MRGELAGVVR	CG11517-PA	7	16	W	L	COF.SAX.CYT
free	MRLGQTVPNFEADTTK	CG11765-PA	1	16	-	G	SG.KcC	CG12405-PA	1	16	-	G	CG12896-PA	1	16	-	G
free	MRLNSVLQR	CG3273-PA	807	815	K	N	COF.SCX.CYT
free	MRVEEATYR	CG1193-PA	1	9	-	R	COF.SAX.CYT
free	MRYVAAYLLAVLGGK	CG4918-PA	1	15	-	D	SG.KcC,SG.KcN,SG.Mito,SG.chr	CG4918-PB	1	15	-	D
free	MSAEKWEKNEEIR	CG6738-PA	1	13	-	I	COF.SCX.CYT
free	MSAPLSKELR	CG6846-PA	30	39	L	Q	COF.SAX.CYT
free	MSEKPTVLILGGCGFIGRNLATYLLDNELAQEIR	CG5854-PA	1	34	-	L	SG.chr
free	MSNGPQLTEEDLKR	CG4210-PA	33	46	K	D	SG.KcC	CG4210-PB	1	14	-	D
free	MSPEISGFR	CG5196-PA	1	9	-	R	COF.SCX.MEM
free	MSSLKLQKR	CG2746-PA	1	9	-	L	COF.SCX.MEM,COF.SCX.NUC	CG2746-PB	1	9	-	L
free	MSWLLGRNRQQPQPDQTAGFSEGGGAADPEGR	CG6815-PA	1	32	-	T	SG.KcM
free	MTPVVNLR	CG17540-PA	41	48	L	S	COF.SAX.CYT	CG17540-PC	1	8	-	S
free	MVLGLDKR	CG18624-PA	1	8	-	A	COF.SCX.MEM,COF.SCX.NUC	CG18624-PB	1	8	-	A
free	MYGPPGTGKTLIAR	CG2331-PA	240	253	L	A	COF.SAX.CYT
free	MYLMYTINENGDR	CG7637-PA	1	13	-	V	SG.KcGel,SG.chr,COF.SCX.MEM,COF.SCX.NUC
free	MYPFGTPTVVPAANFDAVK	CG9968-PA	1	19	-	D	SG.Golgi,SG.KcGel,SG.chr
free	PAADELQSPSSEMVLLTPSSGNPPSSIAQPAANPAEK	CG6070-PA	2	38	M	A	SG.KcM
free	PADQIQYSEK	CG9790-PA	2	11	M	Y	SG.extract,COF.SCX.CYT
free	PADQLAELTLGAIFTSEK	CG10687-PA	2	19	M	K	SG.KcC,SG.KcNR,SG.extract,SG.chr
free	PAEIKPSAPAEPETPTK	CG11949-PA	2	18	M	S	SG.KcC,SG.KcM,SG.KcNR	CG11949-PB	2	18	M	S	CG11949-PC	2	18	M	S	CG11949-PD	2	18	M	S
free	PAENLEEQGLEK	CG5378-PA	2	13	M	N	SG.KcC,SG.extract,SG.chr
free	PAKPVNPDLQKER	CG5009-PA	2	14	M	S	COF.SAX.CYT
free	PAPASSTSVGSGSR	CG10130-PA	2	15	M	S	SG.KcM
free	PDAEQLPDGWEKR	CG17051-PA	2	14	M	T	SG.KcC
free	PDAVQQSFVR	CG5094-PA	2	11	M	S	SG.chr,COF.SAX.CYT,COF.SCX.CYT,COF.SCX.MEM,COF.SCX.NUC
free	PDDTQDAKAQKLAAAR	CG11061-PA	2	17	M	K	COF.SAX.CYT,COF.SCX.CYT,COF.SCX.NUC	CG11061-PB	2	17	M	K
free	PDIKITPLGAGQDVGR	CG1972-PA	2	17	M	S	COF.SAX.CYT,COF.SCX.CYT,COF.SCX.MEM,COF.SCX.NUC
free	PDSVEDTSTISLR	CG7609-PA	2	14	M	I	COF.SCX.MEM	CG7609-PB	2	14	M	I
free	PDYLGDDQR	CG1341-PA	2	10	M	K	SG.KcM,COF.SAX.CYT,COF.SCX.CYT,COF.SCX.MEM,COF.SCX.NUC
free	PEADGEAMVCHLR	CG12013-PA	82	94	M	D	COF.SAX.CYT	CG12013-PB	82	94	M	D	CG12013-PC	111	123	M	D	CG12013-PD	151	163	M	D
free	PEAEQQNDANAPAGAGGDPPKTAK	CG4062-PA	2	25	M	Q	SG.KcC,COF.SAX.CYT	CG4062-PB	2	25	M	Q
free	PEAGKKIAELR	CG6995-PB	2	12	M	V	COF.SCX.NUC
free	PEEPEKTADDKR	CG14999-PA	2	13	M	S	COF.SAX.CYT,COF.SCX.CYT,COF.SCX.MEM
free	PEGNKIDLSGDGGVLK	CG4535-PA	2	17	M	E	SG.KcC
free	PELTEIKSEAAPSTSAEAKPEDVR	CG8759-PA	2	25	M	V	COF.SAX.CYT,COF.SCX.CYT,COF.SCX.NUC	CG8759-PB	2	25	M	V	CG8759-PC	2	25	M	V
free	PENASSSMPTEAGFR	CG5439-PA	2	16	M	S	COF.SCX.NUC
free	PEQVTDQENQAPQQQTTAVHAYNPEVLQDMLPVYYR	CG7108-PA	2	37	M	R	SG.chr
free	PESDVTKMKVADLKR	CG8149-PA	2	16	M	E	COF.SAX.CYT,COF.SCX.CYT,COF.SCX.NUC
free	PEYKKLEDQESDVENANR	CG9248-PA	2	19	M	T	COF.SCX.MEM	CG9248-PB	2	19	M	T
free	PGLTFSNELISR	CG8975-PA	257	268	M	D	COF.SAX.CYT
free	PGNAVDPLATEK	CG10315-PA	52	63	M	T	SG.KcM,COF.SAX.CYT,COF.SCX.CYT,COF.SCX.MEM,COF.SCX.NUC	CG10315-PB	2	13	M	T	CG10315-PC	2	13	M	T
free	PGVTVKDIDQHAVTK	CG4464-PA	2	16	M	A	SG.KcC	CG4464-PB	2	16	M	A	CG4464-PC	2	16	M	A
free	PHFFRVSSNR	CG16880-PA	2	11	M	R	COF.SCX.CYT
free	PIALFKSVR	CG4208-PA	2	10	M	E	COF.SAX.CYT
free	PIEVNTPDKLEYQFFPASGGVFTFK	CG10527-PA	2	26	M	V	SG.Golgi,SG.KcC,SG.KcNR,SG.Mito,SG.chr
free	PILYSVISR	CG1599-PA	2	10	M	G	COF.SAX.CYT,COF.SCX.MEM,COF.SCX.NUC
free	PIYESVMQEKPPIVLDIGTAYTK	CG12235-PA	2	24	M	L	SG.KcC,SG.chr
free	PKIHVKKPLAGLVIR	CG11537-PC	2	16	M	N	COF.SAX.CYT
free	PKKKTGQR	CG10009-PA	2	9	M	K	COF.SAX.CYT
free	PKLILYGLEASPPVR	CG17531-PA	2	16	M	A	COF.SCX.NUC
free	PKNKGKGGKNR	CG8053-PA	2	12	M	R	COF.SAX.CYT	CG8053-PB	2	12	M	R
free	PKVTKEKKSR	CG11837-PA	2	11	M	I	COF.SAX.CYT
free	PLADSQKDLR	CG17596-PA	2	11	M	Q	COF.SAX.CYT,COF.SCX.CYT
free	PLAKDLLHPLPAEEKR	CG10423-PA	2	17	M	K	COF.SAX.CYT
free	PLATSLEKDSIR	CG6891-PA	19	30	M	E	COF.SAX.CYT,COF.SCX.CYT,COF.SCX.MEM,COF.SCX.NUC	CG6891-PB	2	13	M	E
free	PLKLDIKR	CG6699-PA	2	9	M	R	COF.SAX.CYT,COF.SCX.CYT,COF.SCX.MEM
free	PLPTSSFSQQGPTCFDK	CG6878-PA	2	18	M	M	SG.KcM
free	PLTAESAAQQIQDR	CG30390-PA	2	15	M	L	SG.extract,COF.SCX.CYT,COF.SCX.MEM,COF.SCX.NUC
free	PLVVITGLPASGKSTR	CG3587-PA	2	17	M	A	COF.SAX.CYT
free	PNDKILIR	CG4673-PB	2	9	M	V	COF.SCX.CYT,COF.SCX.MEM
free	PNENAEDLSGQELK	CG7436-PA	2	15	M	Q	SG.KcC,SG.KcM,SG.chr
free	PNGLDDQEKLLAEAIGLAR	CG5625-PA	4	22	M	K	COF.SCX.CYT	CG5625-PB	23	41	M	K
free	PNIKVFSGTSHPDLAQR	CG6767-PA	34	50	M	I	COF.SAX.CYT	CG6767-PB	49	65	M	I
free	PPASAVNNSNAAAQAAK	CG17002-PB	2	18	M	A	SG.extract
free	PPAYDLGHSGEAYQPLDTGSGGGNEACAPNSSSAQIR	CG15110-PA	2	38	M	H	SG.KcNR
free	PPNAQAGAQSISDSLIAAASAAADAGQSPTK	CG5887-PA	2	32	M	L	SG.Golgi,SG.KcM,SG.Mito,SG.extract,SG.chr	CG5887-PB	2	32	M	L	CG5887-PC	2	32	M	L	CG5887-PD	2	32	M	L	CG5887-PE	2	32	M	L
free	PQLQKPAPAFAGTAVVNGVFK	CG1633-PA	2	22	M	D	SG.Golgi,SG.KcC,SG.Mito	CG1633-PB	2	22	M	D
free	PQPKPYERPADFIDPGKPSK	CG1753-PA	2	21	M	C	SG.KcC	CG1753-PB	2	21	M	C
free	PRPVLLIHGGAGDISDSR	CG7860-PA	2	19	M	I	COF.SAX.CYT
free	PRSDTEALVADVETGEDSAPR	CG30344-PA	2	22	M	I	SG.chr
free	PSAANTATVTAAIATTVAASASNTNNNSVSK	CG18811-PA	2	32	M	E	SG.chr
free	PSDQDPTPEQISQVK	CG32407-PA	2	16	M	T	SG.extract
free	PSGIRPIDVLLER	CG4347-PA	2	14	M	A	SG.KcC,COF.SAX.CYT
free	PSKKKKYNAR	CG10318-PA	2	11	M	F	COF.SAX.CYT
free	PSKSKPR	CG9250-PA	2	8	M	L	COF.SAX.CYT
free	PSQEVSVNK	CG3416-PA	2	10	M	V	SG.KcM,SG.extract
free	PSSDPLPPKEGALFR	CG12202-PA	2	16	M	K	COF.SCX.CYT,COF.SCX.MEM,COF.SCX.NUC
free	PSTDFADIPAAK	CG4584-PA	2	13	M	K	SG.Golgi,SG.KcC,SG.KcGel,COF.SAX.CYT,COF.SCX.CYT,COF.SCX.NUC
free	PSTLSAKLAYPVAR	CG5355-PA	41	54	M	K	COF.SAX.CYT,COF.SCX.CYT,COF.SCX.NUC
free	PSYELALVLR	CG15016-PA	2	11	M	Q	SG.extract,COF.SCX.CYT,COF.SCX.NUC
free	PTEIENINPNVYDR	CG7949-PA	2	15	M	I	SG.extract,COF.SAX.CYT,COF.SCX.CYT,COF.SCX.NUC
free	PTIGVKR	CG5706-PA	2	8	M	D	COF.SAX.CYT
free	PVQSPIEISNR	CG11284-PA	2	12	M	A	COF.SCX.CYT,COF.SCX.MEM,COF.SCX.NUC
free	PVVEGSDLVLLQR	CG33158-PB	2	14	M	R	COF.SCX.CYT,COF.SCX.MEM,COF.SCX.NUC
free	PVVELKVDR	CG10347-PA	2	10	M	N	COF.SAX.CYT,COF.SCX.CYT,COF.SCX.NUC	CG10347-PB	2	10	M	N
free	PYANQPSVQITELTDDNVK	CG7885-PA	2	20	M	F	SG.chr	CG7885-PB	2	20	M	F
free	PYNMDVLIPEKDELSDLK	CG16916-PA	2	19	M	L	SG.chr
free	SDNNSGSGGGGSGGGGAGNNNSANSGKNSTHR	CG1440-PA	2	33	M	F	COF.SAX.CYT
free	SDSAVATSASPVAAPPATVEK	CG31617-PA	2	22	M	K	SG.Golgi,SG.KcGel,SG.extract,SG.chr
free	SDVFIVSAAR	CG9149-PA	2	11	M	T	COF.SAX.CYT,COF.SCX.CYT,COF.SCX.MEM,COF.SCX.NUC
free	SEQKTSGSGSAAAAR	CG9181-PA	2	16	M	L	COF.SAX.CYT,COF.SCX.NUC	CG9181-PB	2	16	M	L
free	SEQWEVVSKSR	CG33129-PE	2	12	M	K	COF.SCX.MEM
free	SFTGELNDKMKGFYR	CG1009-PA	103	117	M	S	COF.SCX.CYT	CG1009-PB	103	117	M	S	CG1009-PC	312	326	M	S	CG1009-PD	103	117	M	S	CG1009-PE	290	304	M	S	CG1009-PF	103	117	M	S
free	SGGTTMYPGIADR	CG4027-PA	301	313	L	M	COF.SCX.CYT,COF.SCX.MIC,COF.SCX.NUC	CG4027-PB	301	313	L	M	CG5178-PA	301	313	L	M	CG7478-PA	301	313	L	M	CG10067-PA	301	313	M	M	CG12051-PA	301	313	L	M	CG18290-PA	301	313	M	M	CG18290-PB	301	313	M	M
free	SGLSPLKEYEKR	CG8520-PA	28	39	M	V	COF.SCX.MEM,COF.SCX.NUC
free	SGSQVGDLGSGAGK	CG13551-PA	22	35	M	G	SG.KcGel,SG.extract,SG.chr,COF.SAX.CYT	CG13551-PB	22	35	M	G	CG13551-PC	2	15	M	G
free	SGTILENLSGR	CG6210-PA	2	12	M	K	COF.SCX.MEM,COF.SCX.NUC	CG6210-PB	2	12	M	K
free	SIANQDLER	CG2679-PB	36	44	M	Y	COF.SCX.MEM
free	SIMNSFVNDIFER	CG17949-PA	58	70	M	I	COF.SCX.MEM
free	SKLAGESESNLR	CG2331-PA	273	284	M	K	COF.SAX.CYT,COF.SCX.CYT
free	SLTGTQDYDR	CG12730-PA	2	11	M	K	COF.SCX.MEM,COF.SCX.NUC
free	SNIQATEDELQR	CG3399-PA	739	750	M	I	COF.SCX.NUC	CG3399-PB	729	740	M	I	CG3399-PC	834	845	M	I	CG3399-PD	887	898	M	I
free	SPKALNVR	CG10701-PD	2	9	M	V	COF.SAX.CYT,COF.SCX.CYT,COF.SCX.NUC	CG10701-PE	2	9	M	V	CG10701-PF	2	9	M	V	CG10701-PG	2	9	M	V	CG10701-PH	2	9	M	V	CG10701-PI	2	9	M	V	CG10701-PJ	2	9	M	V
free	SPPQLLSKDSPDIEDLLSLNPR	CG2194-PB	2	23	M	V	COF.SCX.CYT	CG2194-PC	2	23	M	V
free	SQEAGQYPPIESAMR	CG31126-PA	2	16	M	K	COF.SCX.CYT,COF.SCX.NUC
free	SQKNLLELTDR	CG16912-PA	24	34	M	G	COF.SCX.MEM,COF.SCX.NUC
free	SSEVSSDNPIYGPFFGVMGAASAIIFSALGAAYGTAK	CG3161-PA	2	38	M	S	SG.Golgi,SG.KcNR,SG.Mito	CG3161-PB	2	38	M	S	CG3161-PC	2	38	M	S	CG3161-PD	2	38	M	S
free	SSKPQYTLSEVDGDLFSAPK	CG33054-PA	2	21	M	T	SG.KcGel	CG33054-PB	22	41	M	T
free	STASSSNSSGEEANKK	CG10960-PB	2	17	M	S	SG.KcM
free	STEPSVAKDAVLKR	CG8005-PA	2	15	M	S	COF.SAX.CYT,COF.SCX.CYT,COF.SCX.MEM
free	STLSDSSVIIDR	CG33138-PA	489	500	M	G	COF.SCX.CYT
free	STNAAASPAEGATISEFR	CG3633-PA	26	43	M	T	COF.SCX.CYT,COF.SCX.MEM,COF.SCX.NUC
free	STSLIVTSSSSR	CG14998-PA	333	344	M	L	COF.SCX.CYT	CG14998-PB	297	308	M	L	CG14998-PC	279	290	M	L	CG14998-PD	429	440	M	L	CG14998-PE	344	355	M	L
free	SVDKIIPIDKLVKGR	CG3265-PA	86	100	M	F	COF.SCX.CYT	CG3265-PB	86	100	M	F	CG3265-PD	86	100	M	F	CG3265-PE	86	100	M	F
free	SVLSKYVDR	CG2316-PA	2	10	M	I	COF.SCX.MEM	CG2316-PB	2	10	M	I	CG2316-PC	2	10	M	I	CG2316-PD	2	10	M	I	CG2316-PE	2	10	M	I	CG2316-PG	2	10	M	I
free	SVQLEELYNGATR	CG8863-PA	118	130	M	K	COF.SAX.CYT,COF.SCX.CYT	CG8863-PB	118	130	M	K	CG8863-PC	118	130	M	K	CG8863-PD	118	130	M	K	CG8863-PE	118	130	M	K
free	SYNVDLPTAIKNLR	CG3752-PA	137	150	M	Y	COF.SCX.NUC
free	TANSLLGR	CG9520-PA	2	9	M	S	COF.SCX.NUC	CG9520-PB	2	9	M	S	CG9520-PC	2	9	M	S
free	TDLNELMGSPFVR	CG32638-PA	2	14	M	V	COF.SCX.CYT,COF.SCX.MEM,COF.SCX.NUC
free	TEAAGATNPGGAAGDAESYGK	CG6230-PA	2	22	M	E	SG.KcM
free	TEKVTKLALASR	CG6657-PA	2	13	M	L	COF.SCX.MEM,COF.SCX.NUC	CG6657-PB	2	13	M	L
free	TELLIDPDIR	CG6750-PA	2	11	M	V	COF.SCX.MEM,COF.SCX.NUC
free	TESVELMNKYGEPLR	CG11880-PA	2	16	M	Y	COF.SCX.MEM,COF.SCX.NUC	CG11880-PB	2	16	M	Y	CG11880-PC	2	16	M	Y
free	TIAESSQKSATR	CG5517-PA	43	54	M	K	COF.SAX.CYT,COF.SCX.CYT,COF.SCX.MEM,COF.SCX.NUC
free	TIGKNNKMIQHLNYR	CG5352-PA	2	16	M	V	COF.SAX.CYT
free	TIKAIKAR	CG17654-PA	2	9	M	Q	COF.SAX.CYT,COF.SCX.CYT,COF.SCX.NUC	CG17654-PB	69	76	M	Q	CG17654-PC	69	76	M	Q	CG17654-PD	69	76	M	Q	CG17654-PE	69	76	M	Q
free	TILGKLR	CG3662-PA	2	8	M	G	COF.SCX.MEM
free	TITYTGEVATCR	CG6264-PA	2	13	M	G	COF.SCX.MEM
free	TKGTSSFGKR	CG9091-PA	2	11	M	H	SG.KcGel,COF.SAX.CYT,COF.SCX.NUC
free	TKKLALKR	CG5033-PA	2	9	M	R	COF.SAX.CYT
free	TKNDNANLLNDNR	CG3164-PB	2	14	M	L	COF.SCX.MEM,COF.SCX.NUC
free	TKTKGEKINKSAINEVVTR	CG1821-PA	2	20	M	E	COF.SAX.CYT,COF.SCX.CYT,COF.SCX.MEM,COF.SCX.NUC	CG1821-PB	2	20	M	E	CG1821-PC	2	20	M	E
free	TLDVGGVAR	CG1518-PA	2	10	M	G	COF.SCX.MEM,COF.SCX.NUC
free	TLEQLSANKCFEGEQR	CG4390-PA	2	17	M	V	COF.SAX.CYT,COF.SCX.CYT	CG4390-PB	46	61	M	V
free	TNATDIGANDVEMEVDPTAETLADEK	CG10484-PA	2	27	M	K	SG.KcM,SG.chr
free	TNNDAAVEAAGSSR	CG5412-PA	2	15	M	A	COF.SAX.CYT,COF.SCX.CYT
free	TNSKGYR	CG12775-PA	2	8	M	R	COF.SCX.CYT,COF.SCX.NUC
free	TNTINSEEVSDAGSYKDKGNEAFKASR	CG2708-PA	2	28	M	W	COF.SAX.CYT,COF.SCX.CYT
free	TRSSIELGDVTPHNIK	CG12352-PA	2	17	M	Q	SG.KcC
free	TTASATLSSDLDDADTSR	CG4241-PA	26	43	M	T	COF.SCX.MEM	CG4241-PC	26	43	M	T
free	TTRTVQR	CG1333-PA	2	8	M	N	COF.SAX.CYT	CG1333-PB	2	8	M	N
free	TTSTIKPTGGDEVPPAGVVGNVADVGVAASLTK	CG32699-PA	2	34	M	R	SG.chr
free	VADPTKSKEYFETTS	CG1633-PA	180	194	M	-	COF.SCX.CYT	CG1633-PB	180	194	M	-
free	VAGGASETGGVKPMVIAGR	CG13240-PA	2	20	M	M	COF.SCX.MEM,COF.SCX.NUC	CG13240-PB	2	20	M	M
free	VAIQLFNEIGSIFR	CG4016-PA	2	15	M	N	SG.extract	CG4016-PB	2	15	M	N	CG4016-PC	2	15	M	N
free	VAQNSDKMR	CG3593-PA	2	10	M	A	COF.SAX.CYT,COF.SCX.CYT
free	VATGGQAQDQGQNQEPDVLNPTSAVTGLPQK	CG4045-PA	2	32	M	R	SG.KcC,SG.chr
free	VAVKKQKKALESTNAR	CG10652-PA	2	17	M	L	COF.SAX.CYT,COF.SCX.MEM,COF.SCX.NUC	CG10652-PB	2	17	M	L
free	VDKIEMSLDDIIK	CG1101-PA	2	14	M	S	SG.KcGel,SG.extract,SG.chr,COF.SCX.CYT,COF.SCX.MEM,COF.SCX.NUC
free	VEDKEQVANGEQVSK	CG3821-PA	2	16	M	K	SG.KcC,SG.KcGel,SG.KcM,SG.extract
free	VESDGTADATR	CG6359-PA	3	13	M	R	COF.SCX.CYT,COF.SCX.MEM,COF.SCX.NUC
free	VETVVNIER	CG15211-PA	2	10	M	T	SG.Golgi,SG.Mito
free	VFEAVVADVLNKVLGDYIENLDRNQLK	CG2093-PA	2	28	M	I	SG.Golgi
free	VGITPAEKKALITR	CG4561-PA	2	15	M	N	COF.SAX.CYT,COF.SCX.CYT,COF.SCX.NUC
free	VGLKFPSNR	CG15653-PA	2	10	M	T	COF.SCX.MEM
free	VGPIEEVVEKADR	CG11154-PA	487	499	M	L	COF.SCX.NUC
free	VIEKIIGDLESNMTLENEEAKR	CG6147-PA	2	23	M	K	COF.SCX.CYT,COF.SCX.MEM
free	VITNNTTLPEESELNVQELNLSSAALR	CG3683-PA	2	28	M	A	SG.KcGel,SG.KcM,SG.chr,COF.SCX.CYT	CG3683-PB	2	28	M	A	CG3683-PC	2	28	M	A
free	VKDEPLSDESADVIVLADREEDDICELEHLR	CG6354-PA	2	32	M	K	SG.chr	CG6354-PB	2	32	M	K
free	VKEKPNSTR	CG6391-PA	2	10	M	I	COF.SAX.CYT	CG6391-PB	2	10	M	I	CG6391-PC	2	10	M	I
free	VKETGYYDILGVKPNATPDELKK	CG8863-PA	2	24	M	A	SG.KcC,SG.chr,COF.SCX.CYT,COF.SCX.NUC	CG8863-PB	2	24	M	A	CG8863-PC	2	24	M	A	CG8863-PD	2	24	M	A	CG8863-PE	2	24	M	A
free	VKGTLYTYPENFR	CG11901-PA	2	14	M	A	SG.KcC,COF.SCX.CYT,COF.SCX.MEM,COF.SCX.NUC	CG11901-PB	2	14	M	A
free	VKILQAYNFAR	CG14562-PA	2	12	M	Q	COF.SAX.CYT
free	VKLTLYGLDPSPPVR	CG17530-PA	2	16	M	A	COF.SCX.CYT,COF.SCX.NUC
free	VKLTPELINQSMQYINPCR	CG1406-PA	2	20	M	E	COF.SCX.NUC
free	VKMLDLDR	CG32171-PD	2	9	M	H	COF.SCX.MEM	CG32171-PH	2	9	M	H
free	VKNEPNFVVER	CG6990-PA	2	12	M	I	SG.chr,COF.SCX.CYT,COF.SCX.MEM
free	VKVKCSELR	CG4111-PA	2	10	M	I	COF.SAX.CYT,COF.SCX.CYT,COF.SCX.MEM,COF.SCX.NUC	CG4111-PB	2	10	M	I
free	VLADLGR	CG4659-PA	2	8	M	K	COF.SCX.MEM
free	VLASLSTGVIAR	CG9633-PA	2	13	M	I	SG.KcN,SG.extract,COF.SAX.CYT,COF.SCX.CYT,COF.SCX.MEM,COF.SCX.NUC
free	VLDLDLFR	CG17259-PA	2	9	M	S	SG.KcGel,SG.KcM,SG.chr,COF.SAX.CYT,COF.SCX.CYT,COF.SCX.NUC
free	VLESTMICFDNSDFQR	CG7619-PA	2	17	M	N	SG.extract,COF.SCX.CYT,COF.SCX.MEM,COF.SCX.NUC
free	VLGFLVR	CG7603-PA	2	8	M	G	SG.KcM
free	VLIKEYR	CG17818-PA	2	8	M	V	COF.SAX.CYT
free	VLKVYVSGMSGNKEVKKR	CG8582-PA	2	19	M	Q	COF.SAX.CYT	CG8582-PB	2	19	M	Q
free	VLLDNSNFILR	CG5417-PA	35	45	M	L	COF.SAX.CYT,COF.SCX.CYT,COF.SCX.NUC
free	VLSNEEQEFIKR	CG12859-PA	2	13	M	K	COF.SCX.MEM,COF.SCX.NUC
free	VLTPTKDGPDQESMPLPADNGESPSK	CG3181-PA	2	27	M	Q	SG.KcC
free	VLTSEQVPQTLKSKHKKQR	CG10315-PA	2	20	M	Q	COF.SAX.CYT
free	VMDATQSQQPSPQSVGR	CG9412-PA	2	18	M	E	SG.KcM,SG.extract,SG.chr,COF.SCX.MEM,COF.SCX.NUC	CG9412-PB	2	18	M	E	CG9412-PC	2	18	M	E	CG9412-PD	2	18	M	E	CG9412-PE	2	18	M	E
free	VNFTVDEIR	CG2238-PA	2	10	M	G	SG.KcC,SG.KcM,SG.KcNR,SG.extract,SG.chr,COF.SAX.CYT,COF.SCX.CYT,COF.SCX.MEM,COF.SCX.NUC
free	VNMGAAGMAPEPALR	CG7635-PA	29	43	M	V	COF.SCX.NUC
free	VNNTVDTEATEIR	CG31641-PC	2	14	M	C	COF.SCX.CYT,COF.SCX.MEM,COF.SCX.NUC
free	VNVPKQR	CG7424-PA	2	8	M	R	COF.SAX.CYT
free	VNVTEDVFANGAVNPFTKSKDTIKR	CG10467-PA	2	26	M	F	COF.SCX.CYT,COF.SCX.NUC
free	VRMNVLADALK	CG2033-PA	2	12	M	C	SG.KcC	CG2033-PC	2	12	M	C	CG2033-PD	2	12	M	C	CG2033-PE	2	12	M	C	CG12324-PA	2	12	M	C
free	VSQQQIEAIGGVLNNKER	CG2245-PA	2	19	M	P	COF.SCX.CYT
free	VVDMDTSETAVELTEAENELYDR	CG12276-PA	2	24	M	Q	SG.KcM,SG.chr,COF.SCX.CYT
free	VVEIKEPKTR	CG7224-PA	38	47	M	T	COF.SCX.NUC
free	VVQEDNPNTGDVQEK	CG5064-PA	2	16	M	T	SG.KcC,SG.KcM,SG.extract
free	VVRPYNDELR	CG9987-PA	2	11	M	Y	COF.SAX.CYT
free	VVTHNVKGYDEFTK	CG11024-PA	2	15	M	K	SG.KcC
free	VYDNPVTWFQDGPYSSELIQIR	CG30323-PA	40	61	M	A	COF.SCX.NUC
free	VYQVKDKADLDGQLTK	CG31884-PA	2	17	M	A	SG.KcC	CG31884-PB	2	17	M	A
SG.KcC=Shotgun Cytoplasmic fraction; SG.KcM=Shotgun Membrane fraction; SG.KcN=Shotgun Nuclear fraction; SG.chr=Shotgun Chromatin Fraction; SG.Golgi= Shotgun Golgi Fraction; SG.KcNR=Shotgun Rapamycin and Untreated Cells; SG.Mito=Shotgun Mitochondrial Fraction; SG.KcGel= Shotgun Gelfiltration; SG.extract=Lysate; COF.SAX.CYT=COFRADIC StrongAnionExchange Cytoplasmic Fraction; COF.SCX.CYT=COFRADIC Str…
[truncated: 78 more columns]
