# Supplementary material for: Identification and Functional Characterization of N-Terminally Acetylated Proteins in Drosophila melanogaster
Source: PLoS Biol. 2009 Nov 3;7(11):e1000236. doi: 10.1371/journal.pbio.1000236 (PMC2762599; doi:10.1371/journal.pbio.1000236)
Supplement: Table S5 — (A–B) PFAM analysis for associating functional domains with the N-terminal acetylation status of a protein. (0.05 MB XLS) [file pbio.1000236.s008.xls]

## Sheet: Tables S5A_B
Table S5A/B: PFAM analysis for associating functional domains with the N-terminal acetylation status of a protein
Table S5A: Analysis of PFAM domains starting in the first 60 amino acids of the protein
Domain Name	Domain Accession	Domain Description	# hits within acetylated proteins for the respective domain	Total number of hits for dmel3.2 minus the acetylated hits	Fisher's Exact Test Acetylated (before correction)	Fisher's Exact Test Acetylated (after correction)	# hits within non-acetylated proteins for the respective domain	Total number of hits for dmel3.2 minus the non-acetylated hits	Fisher's Exact Test NonAcetylated (before correction)	Fisher's Exact Test NonAcetylated (after correction)
Acetyltransf_1	PF00583.16	Acetyltransferase_(GNAT)_family	0	6	1	1	2	4	0.0163788	0.753427
Actin	PF00022.11	Actin	2	13	0.35302	1	7	8	2.91718e-07	1.95451e-05
Aldedh	PF00171.14	Aldehyde_dehydrogenase_family	5	6	0.00113208	0.0600004	1	10	0.32154	1
Aldo_ket_red	PF00248.13	Aldo/keto_reductase_family	3	11	0.102111	1	0	14	1	1
AT_hook	PF02178.11	AT_hook_motif	3	4	0.0150965	0.543473	0	7	1	1
OSCP	PF00213.10	ATP_synthase_delta_(OSCP)_subunit	0	2	1	1	2	0	0.00119803	0.0718815
BolA	PF01722.10	BolA-like_protein	2	0	0.00675946	0.304176	1	1	0.0680847	1
BTB	PF00651.23	BTB/POZ_domain	22	77	1.37575e-05	0.000907996	0	99	0.0517167	1
Metallophos	PF00149.20	Calcineurin-like_phosphoesterase	5	17	0.0302196	0.906588	1	21	0.539811	1
CH	PF00307.23	Calponin_homology_(CH)_domain	7	20	0.00513583	0.236248	2	25	0.239969	1
CoA_binding	PF02629.11	CoA_binding_domain	2	0	0.00675946	0.304176	0	2	1	1
Cofilin_ADF	PF00241.12	Cofilin/tropomyosin-type_actin-binding_protein	4	3	0.00130187	0.0676974	2	5	0.0224088	1
COG6	PF06419.3	Conserved_oligomeric_complex_COG6	2	0	0.00675946	0.304176	0	2	1	1
cwf21	PF08312.4	cwf21	2	0	0.00675946	0.304176	0	2	1	1
COX6B	PF02297.9	Cytochrome_oxidase_c_subunit_VIb	2	0	0.00675946	0.304176	0	2	1	1
dUTPase	PF00692.11	dUTPase	0	2	1	1	2	0	0.00119803	0.0718815
Dynamin_N	PF00350.15	Dynamin_family	4	0	4.55685e-05	0.00291638	0	4	1	1
efhand	PF00036.24	EF_hand	4	23	0.276018	1	3	24	0.0653836	1
ENTH	PF01417.12	ENTH_domain	4	3	0.00130187	0.0676974	0	7	1	1
FERM_N	PF09379.2	FERM_N-terminal_domain	0	15	0.628867	1	6	9	6.45284e-06	0.000412982
Glycolytic	PF00274.11	Fructose-bisphosphate_aldolase_class-I	5	1	2.08944e-05	0.00135813	0	6	1	1
GSHPx	PF00255.11	Glutathione_peroxidase	2	1	0.019168	0.67088	2	1	0.00351135	0.189613
GST_N	PF02798.12	Glutathione_S-transferase,_N-terminal_domain	11	31	0.000440359	0.0268619	5	37	0.0144889	0.695468
HATPase_c	PF02518.18	Histidine_kinase-,_DNA_gyrase_B-,_and_HSP90-like_ATPase	1	3	0.290592	1	2	2	0.00686152	0.356799
IBN_N	PF03810.11	Importin-beta_N-terminal_domain	6	9	0.000799783	0.0431883	0	15	1	1
BIR	PF00653.13	Inhibitor_of_Apoptosis_domain	2	1	0.019168	0.67088	0	3	1	1
Iso_dh	PF00180.12	Isocitrate/isopropylmalate_dehydrogenase	4	4	0.00243439	0.116851	0	8	1	1
Kinesin	PF00225.15	Kinesin_motor_domain	4	15	0.0652722	1	0	19	1	1
L27	PF02828.8	L27_domain	2	0	0.00675946	0.304176	0	2	1	1
LSM	PF01423.14	LSM_domain	7	9	0.000147572	0.00914948	1	15	0.431268	1
Lactamase_B	PF00753.19	Metallo-beta-lactamase_superfamily	1	6	0.451667	1	3	4	0.00130407	0.0718815
MBD	PF01429.11	Methyl-CpG_binding_domain	2	2	0.036252	1	0	4	1	1
Miro	PF08477.5	Miro-like_protein	8	64	0.384769	1	2	70	1	1
MIT	PF04212.10	MIT_(microtubule_interacting_and_transport)_domain	2	0	0.00675946	0.304176	0	2	1	1
IATP	PF04568.4	Mitochondrial_ATPase_inhibitor,_IATP	2	1	0.019168	0.67088	2	1	0.00351135	0.189613
Mito_carr	PF00153.19	Mitochondrial_carrier_protein	3	44	1	1	3	44	0.222035	1
Myosin_N	PF02736.11	Myosin_N-terminal_SH3-like_domain	0	16	0.636689	1	2	14	0.104427	1
NTF2	PF02136.12	Nuclear_transport_factor_2_(NTF2)_domain	3	1	0.00208401	0.104201	1	3	0.131541	1
HEAT_PBS	PF03130.8	PBS_lyase_HEAT-like_repeat	0	2	1	1	2	0	0.00119803	0.0718815
PRA1	PF03208.11	PRA1_family_protein	2	0	0.00675946	0.304176	0	2	1	1
Proteasome	PF00227.18	Proteasome_A-type_and_B-type	4	19	0.115376	1	0	23	1	1
Pkinase	PF00069.17	Protein_kinase_domain	9	90	0.712826	1	0	99	0.0517167	1
Pkinase_Tyr	PF07714.9	Protein_tyrosine_kinase	9	97	0.859171	1	0	106	0.0544017	1
Y_phosphatase	PF00102.19	Protein-tyrosine_phosphatase	2	3	0.0571596	1	2	3	0.0111742	0.547535
Esterase	PF00756.12	Putative_esterase	0	2	1	1	2	0	0.00119803	0.0718815
PK	PF00224.13	Pyruvate_kinase,_barrel_domain	2	2	0.036252	1	2	2	0.00686152	0.356799
Ras	PF00071.14	Ras_family	8	68	0.405032	1	2	74	1	1
Ribosomal_S6e	PF01092.11	Ribosomal_protein_S6e	3	0	0.000555179	0.0316452	3	0	4.1363e-05	0.00260587
Rieske	PF00355.18	Rieske_[2Fe-2S]_domain	2	1	0.019168	0.67088	0	3	1	1
RNA_pol_L	PF01193.16	RNA_polymerase_Rpb3/Rpb11_dimerisation_domain	1	4	0.34895	1	3	2	0.000392539	0.0243374
RRM_1	PF00076.14	RNA_recognition_motif._(a.k.a._RRM,_RBD,_or_RNP_domain)	10	60	0.0771986	1	3	67	0.735988	1
SelR	PF01641.10	SelR_domain	5	0	3.73771e-06	0.000250426	0	5	1	1
Septin	PF00735.10	Septin	3	2	0.00489069	0.229862	0	5	1	1
Serpin	PF00079.12	Serpin_(serine_protease_inhibitor)	9	21	0.000489687	0.0288915	0	30	0.625835	1
adh_short	PF00106.17	short_chain_dehydrogenase	5	53	0.811256	1	0	58	0.269949	1
Cpn60_TCP1	PF00118.16	TCP-1/cpn60_chaperonin_family	6	8	0.000515608	0.0299053	4	10	0.00108111	0.065948
TPR_1	PF00515.20	Tetratricopeptide_repeat	3	8	0.0555546	1	2	9	0.0535662	1
Thymosin	PF01290.12	Thymosin_beta-4_family	4	0	4.55685e-05	0.00291638	0	4	1	1
Tmemb_18A	PF09771.1	Transmembrane_protein_188	2	1	0.019168	0.67088	0	3	1	1
Tubulin	PF00091.17	Tubulin/FtsZ_family,_GTPase_domain	0	14	0.622564	1	6	8	3.98839e-06	0.000259246
TPD52	PF04201.7	Tumour_protein_D52_family	3	1	0.00208401	0.104201	0	4	1	1
ubiquitin	PF00240.15	Ubiquitin_family	0	20	0.403484	1	7	13	3.02053e-06	0.000199355
Cg6151-P	PF10233.1	Uncharacterized_conserved_protein_CG6151-P	3	0	0.000555179	0.0316452	0	3	1	1
Vps35	PF03635.9	Vacuolar_protein_sorting-associated_protein_35	2	0	0.00675946	0.304176	2	0	0.00119803	0.0718815
V-ATPase_H	PF03224.6	V-ATPase_subunit_H	3	0	0.000555179	0.0316452	0	3	1	1
VHS	PF00790.11	VHS_domain	1	3	0.290592	1	2	2	0.00686152	0.356799
WD40	PF00400.24	WD_domain,_G-beta_repeat	11	31	0.000440359	0.0268619	5	37	0.0144889	0.695468
Table S5B: Analysis of PFAM domains starting anywhere in the protein sequence
Domain Name	Domain Accession	Domain Description	# hits within acetylated proteins for the respective domain	Total number of hits for dmel3.2 minus the acetylated hits	Fisher's Exact Test Acetylated (before correction)	Fisher's Exact Test Acetylated (after correction)	# hits within non-acetylated proteins for the respective domain	Total number of hits for dmel3.2 minus the non-acetylated hits	Fisher's Exact Test NonAcetylated (before correction)	Fisher's Exact Test NonAcetylated (after correction)
CoA_binding	PF02629.11	CoA_binding_domain	3	0	0.000555179	0.0438634	0	3	1	1
EB1	PF03271.9	EB1-like_C-terminal_motif	3	2	0.00489069	0.298332	2	3	0.0111742	0.603406
PABP	PF00658.10	Poly-adenylate_binding_protein,_unique_domain	2	0	0.00675946	0.358251	0	2	1	1
Serpin	PF00079.12	Serpin_(serine_protease_inhibitor)	9	27	0.002057	0.137819	0	36	0.636624	1
SPT16	PF08644.3	FACT_complex_subunit_(SPT16/CDC68)	2	0	0.00675946	0.358251	0	2	1	1
EF1_GNE	PF00736.11	EF-1_guanine_nucleotide_exchange_domain	0	3	1	1	2	1	0.00351135	0.20717
Kinesin	PF00225.15	Kinesin_motor_domain	6	20	0.0168437	0.606374	0	26	1	1
GSHPx	PF00255.11	Glutathione_peroxidase	3	1	0.00208401	0.137819	3	1	0.000161175	0.0122493
Yip1	PF04893.9	Yip1_domain	5	1	2.08944e-05	0.00173423	0	6	1	1
RrnaAD	PF00398.12	Ribosomal_RNA_adenine_dimethylase	0	4	1	1	2	2	0.00686152	0.384245
Rtt106	PF08512.4	Histone_chaperone_Rttp106-like	3	0	0.000555179	0.0438634	0	3	1	1
FH2	PF02181.15	Formin_Homology_2_Domain	0	13	0.618115	1	4	9	0.00079385	0.0563633
FA	PF08736.3	FERM_adjacent_(FA)	1	9	0.57619	1	4	6	0.000253351	0.0190014
Cofilin_ADF	PF00241.12	Cofilin/tropomyosin-type_actin-binding_protein	4	3	0.00130187	0.0911311	2	5	0.0224088	1
DUF1171	PF06664.4	Protein_of_unknown_function_(DUF1171)	0	2	1	1	2	0	0.00119803	0.0838618
KH_1	PF00013.21	KH_domain	9	24	0.00105431	0.0759101	1	32	1	1
Vps35	PF03635.9	Vacuolar_protein_sorting-associated_protein_35	2	0	0.00675946	0.358251	2	0	0.00119803	0.0838618
CS	PF04969.8	CS_domain	4	5	0.00409775	0.25406	1	8	0.271944	1
Pribosyltran	PF00156.19	Phosphoribosyl_transferase_domain	2	7	0.165535	1	3	6	0.00297128	0.178277
EF-1_beta_acid	PF10587.1	Eukaryotic_elongation_factor_1_beta_central_acidic_region	0	3	1	1	2	1	0.00351135	0.20717
tRNA-synt_2	PF00152.12	tRNA_synthetases_class_II_(D,_K_and_N)	2	4	0.0811471	1	2	4	0.0163788	0.82304
Glycolytic	PF00274.11	Fructose-bisphosphate_aldolase_class-I	5	1	2.08944e-05	0.00173423	0	6	1	1
ubiquitin	PF00240.15	Ubiquitin_family	0	23	0.254097	1	7	16	8.72454e-06	0.000724137
Coatomer_WDAD	PF04053.6	Coatomer_WD_associated_region	1	1	0.157727	1	2	0	0.00119803	0.0838618
V-ATPase_H	PF03224.6	V-ATPase_subunit_H	3	0	0.000555179	0.0438634	0	3	1	1
Lactamase_B	PF00753.19	Metallo-beta-lactamase_superfamily	2	7	0.165535	1	4	5	0.000156289	0.0120342
Tubulin_C	PF03953.9	Tubulin/FtsZ_family,_C-terminal_domain	0	14	0.622564	1	6	8	3.98839e-06	0.000339014
BTB	PF00651.23	BTB/POZ_domain	22	114	0.00235322	0.148253	0	136	0.0158277	0.82304
TACC	PF05010.6	Transforming_acidic_coiled-coil-containing_protein_(TACC)	5	0	3.73771e-06	0.000321443	0	5	1	1
WD40	PF00400.24	WD_domain,_G-beta_repeat	23	161	0.041859	1	13	171	0.0133703	0.708628
6PF2K	PF01591.10	6-phosphofructo-2-kinase	2	0	0.00675946	0.358251	0	2	1	1
Aldedh	PF00171.14	Aldehyde_dehydrogenase_family	5	12	0.00999861	0.369948	1	16	0.450989	1
COX6B	PF02297.9	Cytochrome_oxidase_c_subunit_VIb	2	0	0.00675946	0.358251	0	2	1	1
Aldolase_II	PF00596.13	Class_II_Aldolase_and_Adducin_N-terminal_domain	5	0	3.73771e-06	0.000321443	0	5	1	1
Cg6151-P	PF10233.1	Uncharacterized_conserved_protein_CG6151-P	3	0	0.000555179	0.0438634	0	3	1	1
NTF2	PF02136.12	Nuclear_transport_factor_2_(NTF2)_domain	3	1	0.00208401	0.137819	1	3	0.131541	1
PRA1	PF03208.11	PRA1_family_protein	2	0	0.00675946	0.358251	0	2	1	1
HSA	PF07529.5	HSA	3	2	0.00489069	0.298332	0	5	1	1
DEAD	PF00270.21	DEAD/DEAH_box_helicase	6	44	0.300779	1	9	41	4.75259e-05	0.00375454
RNA_pol_L	PF01193.16	RNA_polymerase_Rpb3/Rpb11_dimerisation_domain	1	4	0.34895	1	3	2	0.000392539	0.0286557
GST_N	PF02798.12	Glutathione_S-transferase,_N-terminal_domain	11	32	0.000548293	0.0438634	5	38	0.0159414	0.82304
PCI	PF01399.19	PCI_domain	9	6	5.32258e-07	4.63065e-05	2	13	0.0934413	1
Ldh_2	PF02615.6	Malate/L-lactate_dehydrogenase	3	2	0.00489069	0.298332	0	5	1	1
Ligase_CoA	PF00549.11	CoA-ligase	3	2	0.00489069	0.298332	0	5	1	1
Tropomyosin	PF00261.12	Tropomyosin	5	6	0.00113208	0.0803779	0	11	1	1
PGM_PMM_II	PF02879.8	Phosphoglucomutase/phosphomannomutase,_alpha/beta/alpha_domain_II	3	1	0.00208401	0.137819	0	4	1	1
OSCP	PF00213.10	ATP_synthase_delta_(OSCP)_subunit	0	2	1	1	2	0	0.00119803	0.0838618
Myosin_N	PF02736.11	Myosin_N-terminal_SH3-like_domain	0	17	0.391699	1	2	15	0.115741	1
Thymosin	PF01290.12	Thymosin_beta-4_family	2	0	0.00675946	0.358251	0	2	1	1
LSM	PF01423.14	LSM_domain	7	10	0.000233104	0.0188814	1	16	0.450989	1
Iso_dh	PF00180.12	Isocitrate/isopropylmalate_dehydrogenase	4	6	0.00638807	0.351344	0	10	1	1
PRP4	PF08799.3	pre-mRNA_processing_factor_4_(PRP4)_like	2	0	0.00675946	0.358251	0	2	1	1
Peptidase_M1	PF01433.12	Peptidase_family_M1	4	25	0.295087	1	5	24	0.00292125	0.178196
Rieske	PF00355.18	Rieske_[2Fe-2S]_domain	4	3	0.00130187	0.0911311	0	7	1	1
Esterase	PF00756.12	Putative_esterase	0	2	1	1	2	0	0.00119803	0.0838618
COG6	PF06419.3	Conserved_oligomeric_complex_COG6	2	0	0.00675946	0.358251	0	2	1	1
Inositol_P	PF00459.17	Inositol_monophosphatase_family	4	6	0.00638807	0.351344	0	10	1	1
Ribosomal_S6e	PF01092.11	Ribosomal_protein_S6e	3	0	0.000555179	0.0438634	3	0	4.1363e-05	0.00335041
Leuk-A4-hydro_C	PF09127.3	Leukotriene_A4_hydrolase,_C-terminal	0	2	1	1	2	0	0.00119803	0.0838618
PGM_PMM_I	PF02878.8	Phosphoglucomutase/phosphomannomutase,_alpha/beta/alpha_domain_I	3	2	0.00489069	0.298332	0	5	1	1
UIM	PF02809.12	Ubiquitin_interaction_motif	3	8	0.0555546	1	4	7	0.00038724	0.0286557
tRNA_bind	PF01588.12	Putative_tRNA_binding_domain	2	0	0.00675946	0.358251	1	1	0.0680847	1
VHS	PF00790.11	VHS_domain	1	3	0.290592	1	2	2	0.00686152	0.384245
SelR	PF01641.10	SelR_domain	5	0	3.73771e-06	0.000321443	0	5	1	1
YIF1	PF03878.7	YIF1	3	0	0.000555179	0.0438634	0	3	1	1
Nramp	PF01566.10	Natural_resistance-associated_macrophage_protein	2	0	0.00675946	0.358251	0	2	1	1
4_1_CTD	PF05902.5	4.1_protein_C-terminal_domain_(CTD)	0	4	1	1	4	0	1.42572e-06	0.000122611
Actin	PF00022.11	Actin	2	13	0.35302	1	7	8	2.91718e-07	2.53795e-05
dUTPase	PF00692.11	dUTPase	0	2	1	1	2	0	0.00119803	0.0838618
cwf21	PF08312.4	cwf21	2	0	0.00675946	0.358251	0	2	1	1
TPD52	PF04201.7	Tumour_protein_D52_family	3	2	0.00489069	0.298332	0	5	1	1
Tubulin	PF00091.17	Tubulin/FtsZ_family,_GTPase_domain	0	14	0.622564	1	6	8	3.98839e-06	0.000339014
DOT1	PF08123.5	Histone_methylation_protein_DOT1	2	0	0.00675946	0.358251	0	2	1	1
Cpn60_TCP1	PF00118.16	TCP-1/cpn60_chaperonin_family	6	9	0.000799783	0.0583841	4	11	0.00143414	0.0903505
Tmemb_18A	PF09771.1	Transmembrane_protein_188	2	1	0.019168	0.67088	0	3	1	1
PNPOx_C	PF10590.1	Pyridoxine_5'-phosphate_oxidase_C-terminal_dimerisation_region	2	0	0.00675946	0.358251	0	2	1	1
IATP	PF04568.4	Mitochondrial_ATPase_inhibitor,_IATP	2	1	0.019168	0.67088	2	1	0.00351135	0.20717
FERM_C	PF09380.2	FERM_C-terminal_PH-like_domain	3	17	0.223966	1	6	14	4.30898e-05	0.00344718
tRNA_anti	PF01336.17	OB-fold_nucleic_acid_binding_domain	2	6	0.135859	1	3	5	0.00203295	0.126043
FERM_M	PF00373.10	FERM_central_domain	3	26	0.729189	1	6	23	0.000404935	0.0291553
FERM_N	PF09379.2	FERM_N-terminal_domain	3	20	0.431238	1	6	17	0.000102699	0.00801056
BolA	PF01722.10	BolA-like_protein	2	0	0.00675946	0.358251	1	1	0.0680847	1
SNAP-25	PF00835.11	SNAP-25_family	2	2	0.036252	1	0	4	1	1
ENTH	PF01417.12	ENTH_domain	4	3	0.00130187	0.0911311	0	7	1	1
Ndr	PF03096.6	Ndr_family	0	10	1	1	5	5	1.06944e-05	0.000876942
DEK_C	PF08766.3	DEK_C_terminal_domain	3	3	0.00918449	0.358251	0	6	1	1
IBN_N	PF03810.11	Importin-beta_N-terminal_domain	6	9	0.000799783	0.0591839	0	15
