# Supplementary material for: Identification and Functional Characterization of N-Terminally Acetylated Proteins in Drosophila melanogaster
Source: PLoS Biol. 2009 Nov 3;7(11):e1000236. doi: 10.1371/journal.pbio.1000236 (PMC2762599; doi:10.1371/journal.pbio.1000236)
Supplement: Table S6 — Confirmation of the XPX and PX rule by targeted SRM. (0.03 MB XLS) [file pbio.1000236.s009.xls]

## Sheet: Table S6
Table S6: Confirmation of the XPX and PX rule by targeted SRM
Accession Number	Nterminus	Sequence	Precursor mz	Product mz	# of Transitions detected	(X)PX rule
CG1633	free	PQLQKPAPAFAGTAVVNGVFK	714.069/ 1070.599	762.45/ 833.487/ 934.535/ 1209.662/ 1377.752/ 1448.789	6	PX
CG1633	free	MPQLQKPAPAFAGTAVVNGVFK			0
CG1633	Acetyl-N	PQLQKPAPAFAGTAVVNGVFK			0
CG1633	Acetyl-N	MPQLQKPAPAFAGTAVVNGVFK			0
CG1633	Acetyl-N Oxidized Met	MPQLQKPAPAFAGTAVVNGVFK			0
CG1633	free Oxidized Met	MPQLQKPAPAFAGTAVVNGVFK			0
CG3140	free	APNAAVPVER	512.283	599.352/ 670.389/741.426/855.468	4	(X)PX
CG3140	free	MAPNAAVPVER	577.804	500.283/ 599.352/ 670.389/ 741.426	4
CG3140	Acetyl-N	APNAAVPVER
CG3140	Acetyl-N	MAPNAAVPVER
CG3140	Acetyl-N Oxidized Met	MAPNAAVPVER
CG3140	free Oxidized Met	MAPNAAVPVER
CG4464	free	PGVTVK	300.689	347.228/ 446.297/ 503.318/ 600.371	4	PX
CG4464	free	MPGVTVK			0
CG4464	Acetyl-N	PGVTVK			0
CG4464	Acetyl-N	MPGVTVK			0
CG4464	Acetyl-N Oxidized Met	MPGVTVK			0
CG4464	free Oxidized Met	MPGVTVK			0
CG4584	free	PSTDFADIPAAK	616.812	685.387/ 832.456/ 947.483/ 1048.53	4	PX
CG4584	free	MPSTDFADIPAAK			0
CG4584	Acetyl-N	PSTDFADIPAAK			0
CG4584	Acetyl-N	MPSTDFADIPAAK			0
CG4584	Acetyl-N Oxidized Met	MPSTDFADIPAAK			0
CG4584	free Oxidized Met	MPSTDFADIPAAK			0
CG5009	free	PAKPVNPDLQK	603.846	714.378/ 813.446/ 910.499/ 1038.594	4	PX
CG5009	free	MPAKPVNPDLQK			0
CG5009	Acetyl-N	PAKPVNPDLQK			0
CG5009	Acetyl-N	MPAKPVNPDLQK			0
CG5009	Acetyl-N Oxidized Met	MPAKPVNPDLQK			0
CG5009	free Oxidized Met	MPAKPVNPDLQK			0
CG5094	free	PDAVQQSFVR	573.799	636.346/ 764.404/ 863.473/ 934.51	4	PX
CG5094	free	MPDAVQQSFVR			0
CG5094	Acetyl-N	PDAVQQSFVR			0
CG5094	Acetyl-N	MPDAVQQSFVR			0
CG5094	Acetyl-N Oxidized Met	MPDAVQQSFVR			0
CG5094	free Oxidized Met	MPDAVQQSFVR			0
CG5887	free	PDAVQQSFVR	956.144	803.389/874.426/1016.5/1103.532/ 1174.569	5	PX
CG5094	free	MPDAVQQSFVR			0
CG5094	Acetyl-N	PDAVQQSFVR			0
CG5094	Acetyl-N	MPDAVQQSFVR			0
CG5094	Acetyl-N Oxidized Met	MPDAVQQSFVR			0
CG5094	free Oxidized Met	MPDAVQQSFVR			0
CG6647	free	APPSYSDLGK	517.761	519.277/ 682.34/ 769.372/ 866.425	4	(X)PX
CG6647	free	MAPPSYSDLGK	583.282	682.34/ 769.372/ 866.425/ 963.478	4
CG6647	Acetyl-N	APPSYSDLGK			0
CG6647	Acetyl-N	MAPPSYSDLGK			0
CG6647	Acetyl-N Oxidized Met	MAPPSYSDLGK			0
CG6647	free Oxidized Met	MAPPSYSDLGK	591.279		0
CG7436	free	PNENAEDLSGQELK	772.365	774.435/ 889.462/ 1018.505/ 1089.542	4	PX
CG7436	free	MPNENAEDLSGQELK			0
CG7436	Acetyl-N	PNENAEDLSGQELK			0
CG7436	Acetyl-N	MPNENAEDLSGQELK			0
CG7436	Acetyl-N Oxidized Met	MPNENAEDLSGQELK			0
CG7436	free Oxidized Met	MPNENAEDLSGQELK			0
CG7860	free	PRPVLLIHGGAGDISDSR	930.508	934.422/ 1071.481/ 1184.565/ 1297.649	4	PX
CG7860	free	MPRPVLLIHGGAGDISDSR			0
CG7860	Acetyl-N	PRPVLLIHGGAGDISDSR			0
CG7860	Acetyl-N	MPRPVLLIHGGAGDISDSR			0
CG7860	Acetyl-N Oxidized Met	MPRPVLLIHGGAGDISDSR			0
CG7860	free Oxidized Met	MPRPVLLIHGGAGDISDSR			0
CG8759	free	PELTEIK	415.237	260.197/ 490.288/ 603.372/ 732.414	4	PX
CG8759	free	MPELTEIK			0
CG8759	Acetyl-N	PELTEIK			0
CG8759	Acetyl-N	MPELTEIK			0
CG8759	Acetyl-N Oxidized Met	MPELTEIK			0
CG8759	free Oxidized Met	MPELTEIK	488.755	389.24/ 603.372	2	(X)PX
CG10130	free	PAPASSTSVGSGSR	630.813	649.326/ 750.374/ 837.406/ 924.438	4	PX
CG10130	free	MPAPASSTSVGSGSR			0
CG10130	Acetyl-N	PAPASSTSVGSGSR			0
CG10130	Acetyl-N	MPAPASSTSVGSGSR			0
CG10130	Acetyl-N Oxidized Met	MPAPASSTSVGSGSR			0
CG10130	free Oxidized Met	MPAPASSTSVGSGSR			0
CG10315	free	PGNAVDPLATEK	606.317	658.376/ 773.403/ 872.472/ 943.509	4	PX
CG10315	free	MPGNAVDPLATEK			0
CG10315	Acetyl-N	PGNAVDPLATEK			0
CG10315	Acetyl-N	MPGNAVDPLATEK			0
CG10315	Acetyl-N Oxidized Met	MPGNAVDPLATEK			0
CG10315	free Oxidized Met	MPGNAVDPLATEK			0
CG10687	free	PADQLAELTLGAIFTSEK	952.504	965.53/ 1066.577/ 1179.661/ 1308.704	4	PX
CG10687	free	MPADQLAELTLGAIFTSEK			0
CG10687	Acetyl-N	PADQLAELTLGAIFTSEK			0
CG10687	Acetyl-N	MPADQLAELTLGAIFTSEK			0
CG10687	Acetyl-N Oxidized Met	MPADQLAELTLGAIFTSEK			0
CG10687	free Oxidized Met	MPADQLAELTLGAIFTSEK			0
CG11284	free	PVQSPIEISNR	620.338	731.404/ 828.457/ 915.489/ 1043.547	4	PX
CG11284	free	MPVQSPIEISNR			0
CG11284	Acetyl-N	PVQSPIEISNR			0
CG11284	Acetyl-N	MPVQSPIEISNR			0
CG11284	Acetyl-N Oxidized Met	MPVQSPIEISNR			0
CG11284	free Oxidized Met	MPVQSPIEISNR			0
CG16916	free	PYNMDVLIPEK	659.839	813.471/ 944.512/ 1058.555	3	PX
CG16916	free	MPYNMDVLIPEK	725.359	813.471/944.512/ 1058.555/ 1221.618	4	(X)PX
CG16916	Acetyl-N	PYNMDVLIPEK			0
CG16916	Acetyl-N	MPYNMDVLIPEK			0
CG16916	Acetyl-N Oxidized Met	MPYNMDVLIPEK			0
CG16916	free Oxidized Met	MPYNMDVLIPEK			0
