# Supplementary material for: Identification and Functional Characterization of N-Terminally Acetylated Proteins in Drosophila melanogaster
Source: PLoS Biol. 2009 Nov 3;7(11):e1000236. doi: 10.1371/journal.pbio.1000236 (PMC2762599; doi:10.1371/journal.pbio.1000236)
Supplement: Table S10 — Acetylated internal peptides. Their N-termini do not comply with the suggested N-terminal acetylation rules. (0.11 MB XLS) [file pbio.1000236.s013.xls]

## Sheet: Table S10
Table S10: Acetylated internal peptides. Their N-termini do not comply with the suggested N-terminal acetylation rules
Peptide	Seen Acetylated	Seen Free	Tryptic Peptide	Protein Context	Experiments
AAGITYIQYSNIAAR	1	1	yes	CG9032-PA:6:20:R:I,CG9032-PB:6:20:R:I	SG.KcGel,SG.KcM
AASDIAMNDLPPTHPIR	1	1	yes	CG31196-PA:154:170:K:L,CG31196-PB:154:170:K:L,CG31196-PC:154:170:K:L,CG31196-PD:154:170:K:L	SG.Golgi,SG.KcC,SG.KcGel,SG.KcM,SG.KcNR,SG.Mito,COF.SAX.CYT
AAVPSGASTGVHEALELR	1	1	yes	CG17654-PA:33:50:R:D,CG17654-PB:100:117:R:D,CG17654-PC:100:117:R:D,CG17654-PD:100:117:R:D,CG17654-PE:100:117:R:D	SG.KcC,SG.KcGel,SG.Mito
ADGVSLPR	1	0	no	CG6312-PA:382:389:T:S	COF.SCX.CYT,COF.SCX.MEM
AESSDSDKTAECSLKVR	1	0	yes	CG17762-PA:564:580:K:N,CG17762-PB:564:580:K:N,CG17762-PC:564:580:K:N,CG17762-PD:564:580:K:N	SG.KcGel
AFCELAEAILDKTSGR	1	1	yes	CG17060-PA:162:177:R:E	SG.KcNR
AFSVALESIPLALAENSGLHPIETLSELK	1	1	yes	CG8439-PA:451:479:R:A,CG8439-PB:421:449:R:A	SG.Golgi,SG.KcNR,SG.Mito,SG.extract,SG.chr
AGANVISLQYGSNK	1	1	yes	CG14996-PB:160:173:R:G	SG.Golgi,SG.KcGel,SG.KcM,extract
AGANVISLQYGSNKGATQSGINFGNTR	1	1	yes	CG14996-PB:160:186:R:H	SG.KcC,SG.chr
AGDEATSGEAASVDKVK	1	1	yes	CG6384-PA:1054:1070:K:S,CG6384-PB:1054:1070:K:S	SG.KcC
AGDFQQLAQFPSLGGGHFTFGSER	1	0	yes	CG15727-PA:111:134:R:E	SG.KcGel
AGECTEEEVDKVVTIISNPLQYK	1	1	yes	CG8900-PA:56:78:R:V,CG8900-PB:56:78:R:V	SG.KcC,SG.KcN,SG.KcNR,extract,SG.chr
AGEFSTLLSPLEPEYKQVLQK	1	1	yes	CG13281-PA:945:965:R:Y	SG.KcC
AGFAGDDAPR	1	1	yes	CG10067-PA:20:29:K:A,CG12051-PA:20:29:K:A,CG18290-PA:20:29:K:A,CG18290-PB:20:29:K:A,CG4027-PA:20:29:K:A,CG4027-PB:20:29:K:A,CG5178-PA:20:29:K:A,CG7478-PA:20:29:K:A	SG.Golgi,SG.KcGel,SG.KcM,SG.KcNR,extract,SG.chr,COF.SCX.MEM
AGFLTDKIINNVPSR	1	0	yes	CG10990-PA:472:486:R:G	SG.KcC
AGGAPGTETESNDIDETGSDEKVAK	1	0	yes	CG5215-PB:849:873:K:K	SG.KcC
AGGEVLTFDQLALR	1	1	yes	CG8615-PA:116:129:K:S	SG.Golgi,SG.KcGel,SG.KcM,extract,SG.chr
AGGLLALTGAKPALEGTPGMIGYGMAK	1	1	yes	CG4665-PA:120:146:K:A	SG.KcC
AGGTAGTLLQPVLDNQIGHK	1	1	yes	CG4097-PA:157:176:R:N	SG.KcC,SG.chr
AGIKVTVAGLNGGEAVK	1	0	yes	CG1349-PA:46:62:R:C	SG.KcC
AGKFQEALEDAEKTIQLNPTWPK	1	1	yes	CG2720-PA:51:73:K:G	SG.KcC
AGLQFPVGR	1	1	yes	CG31618-PA:21:29:R:I,CG5499-PA:24:32:R:I	SG.KcGel,SG.KcM,extract,SG.chr
AGNAPLDVVVQDVFGTKLPVELK	1	1	yes	CG3937-PA:833:855:K:N,CG3937-PD:833:855:K:N	SG.KcC,SG.chr
AGPVVDVLGDEMTR	1	1	yes	CG7176-PA:7:20:K:I,CG7176-PB:41:54:K:I,CG7176-PC:60:73:K:I,CG7176-PD:28:41:K:I,CG7176-PE:7:20:K:I,CG7176-PF:7:20:K:I,CG7176-PG:41:54:K:I	SG.Golgi,SG.KcGel,SG.KcNR,SG.chr,COF.SAX.CYT,COF.SCX.MEM
AGQILWIR	1	0	yes	CG2165-PA:1030:1037:R:G,CG2165-PB:1030:1037:R:G	COF.SAX.CYT
AGQSLADPAQYTNLFPGLGDALRVEQHLQEER	1	1	yes	CG6699-PA:786:817:K:A	SG.KcC
AGTATPQPGNTSTPRPPSAGPQPPPPSTHSQTASSPLSPTR	1	1	yes	CG6944-PA:8:48:R:H	SG.KcC,SG.chr
AGTFGAFEQFGNELLQANHYASPEIK	1	1	yes	CG1977-PA:1340:1365:R:E	SG.Golgi,SG.KcGel,SG.KcNR,SG.extract,SG.chr
AGVAFFQAAIQAGTEDLR	1	0	yes	CG5692-PA:61:78:R:T	SG.KcGel
AGVYPEKQETQENGDESASEESSSDPQLER	1	1	yes	CG18102-PA:619:648:R:Q,CG18102-PB:619:648:R:Q,CG18102-PC:619:648:R:Q,CG18102-PD:619:648:R:Q,CG18102-PE:619:648:R:Q,CG18102-PF:619:648:R:Q,CG18102-PG:619:648:R:Q	SG.KcC
AICYIVIR	1	0	no	CG18445-PA:91:98:P:T	COF.SAX.CYT
AKCELSSSQQTDINLPYLTMDAAGPQHMNLK	1	0	yes	CG8542-PA:315:345:K:L	SG.KcNR
AKEAVLNGAR	1	0	no	CG2151-PA:25:34:C:V,CG2151-PB:130:139:C:V,CG2151-PC:42:51:C:V	COF.SCX.NUC
AKFYPEDVAEELIQDITLR	1	1	yes	CG10701-PA:145:163:R:L,CG10701-PB:154:172:R:L,CG10701-PC:17:35:R:L,CG10701-PD:83:101:R:L,CG10701-PE:83:101:R:L,CG10701-PF:83:101:R:L,CG10701-PG:83:101:R:L,CG10701-PH:83:101:R:L,CG10701-PI:83:101:R:L,CG10701-PJ:83:101:R:L	SG.KcC,SG.KcNR
AKKQNGAAIR	1	0	yes	CG32264-PA:199:208:R:T,CG32264-PC:31:40:R:T,CG32264-PD:270:279:C:T	COF.SAX.CYT
AKPTVVEDVR	1	0	no	CG31916-PA:7610:7619:E:K	COF.SCX.MEM
AKVNVNDIFYDLVR	1	0	yes	CG1956-PA:149:162:K:Q	SG.KcNR
ALKNHGIAR	1	0	no	CG6191-PA:494:502:A:C	COF.SCX.MEM
ALSSAEPIR	1	0	no	CG14569-PA:18:26:L:R	COF.SAX.CYT
ALVGSVVEVRLR	1	0	no	CG5166-PA:6:17:T:S,CG5166-PB:67:78:T:S,CG5166-PC:6:17:T:S	COF.SCX.MEM
AMQEQMNLR	1	0	yes	CG31175-PB:257:265:R:N	COF.SAX.CYT
AMSIMNSFVNDIFER	1	1	yes	CG17949-PA:56:70:K:I	SG.Golgi,SG.KcGel,SG.KcM,SG.chr
ANAGSNIGGPNAK	1	1	yes	CG4170-PA:65:77:K:K,CG4170-PB:65:77:K:K,CG4170-PC:65:77:K:K,CG4170-PD:65:77:K:K	SG.KcGel,SG.KcM,SG.extract
ANGATSKLTTIEVDDR	1	1	no	CG4592-PA:27:42:L:S	COF.SCX.CYT,COF.SCX.MEM,COF.SCX.NUC
ANIILDMATLTGAQGVATGK	1	1	yes	CG7340-PA:503:522:K:Y,CG7340-PB:406:425:K:Y,CG7340-PC:431:450:K:Y	extract
AQASLPTNTFAITGHGENK	1	1	yes	CG3644-PA:74:92:K:T,CG3644-PB:74:92:K:T	SG.KcC,SG.KcGel,SG.KcM,SG.Mito,extract,SG.chr
AQEYLRAQLSVPR	1	0	yes	CG5626-PA:58:70:R:I	COF.SCX.NUC
ARCLEDELR	1	0	yes	CG32940-PA:777:785:R:T,CG32940-PD:777:785:R:T	COF.SAX.CYT
ASDQVGEFVK	1	0	yes	CG3590-PA:448:457:R:E	SG.extract
ATGYGVSLLLTLFGGHTDSK	1	0	yes	CG7340-PA:616:635:R:L,CG7340-PB:519:538:R:L,CG7340-PC:544:563:R:L	SG.extract
AVEILAWVGKGLVVAGFDEAADVVGDLSDLLK	1	0	yes	CG12005-PB:730:761:R:H	SG.chr
CDVDIRKDLYANTVLSGGTTMYPGIADR	1	1	yes	CG12051-PA:286:313:K:M,CG4027-PA:286:313:K:M,CG4027-PB:286:313:K:M	SG.KcC,SG.KcN,SG.KcNR,SG.extract,SG.chr
CGLRVSPR	1	0	yes	CG32333-PA:32:39:R:L	COF.SAX.CYT
CNRPGHFARDCSLGGGGGPGGVGGGGGGGGGGMR	1	1	yes	CG3800-PA:10:43:K:G	SG.KcM
CTSVSAAPSGR	1	0	no	CG1877-PA:53:63:Y:S,CG1877-PB:53:63:Y:S,CG1877-PC:53:63:Y:S,CG1877-PD:53:63:Y:S	COF.SCX.MEM
CTYVQEFDGER	1	0	yes	CG12908-PA:775:785:R:N,CG12908-PB:775:785:R:N	COF.SCX.CYT,COF.SCX.MEM,COF.SCX.NUC
CVAQPEPMADR	1	0	no	CG1512-PA:46:56:L:L,CG1512-PB:46:56:L:L	COF.SAX.CYT
CVPVGGYPDELVLDVLNDDLIAQVR	1	0	yes	CG17998-PA:230:254:K:N	SG.chr
DAEDCTGLTQPIAVNSGSVSGAPVK	1	1	yes	CG12384-PA:37:61:K:G	SG.KcM,SG.chr
DAEIVGMAQQALTDTQFGAR	1	1	yes	CG15792-PA:708:727:K:T,CG15792-PB:663:682:K:T	extract,SG.chr
DAFTDYFSDYDCNQPLMER	1	1	no	CG6827-PA:36:54:A:A,CG6827-PB:36:54:A:A	COF.SCX.NUC
DAGFDMAYTVLGQYLVLK	1	1	yes	CG7380-PA:37:54:K:K	SG.KcGel,SG.extract,SG.chr
DALNQVGFKLAGYQVR	1	0	yes	CG8649-PA:41:56:K:E,CG8649-PC:17:32:K:E,CG8649-PD:42:57:K:E	COF.SCX.NUC
DAVAAEEVAAEK	1	1	yes	CG2207-PA:28:39:K:A,CG2207-PB:28:39:K:A	SG.Golgi,SG.KcGel,SG.KcM
DDDRLSGRNNFNMMSNDYNNSSNYNLYGLSASFLESLGISGPLHNK	1	0	yes	CG9373-PA:188:233:R:V	SG.chr
DEEVAALVVDNGSGMCKAGFAGDDAPR	1	1	no	CG12051-PA:3:29:C:A,CG4027-PA:3:29:C:A,CG4027-PB:3:29:C:A	COF.SAX.CYT,COF.SCX.CYT,COF.SCX.MEM,COF.SCX.NUC
DELQKDAAGRLPLPPGLAAPGSAVGSVTATSSSVVVPGAADK	1	0	yes	CG17255-PA:1297:1338:K:K,CG17255-PB:1297:1338:K:K	SG.chr
DGCIESEPLTDDELNCLNETTR	1	1	yes	CG7340-PA:296:317:K:A,CG7340-PB:199:220:K:A,CG7340-PC:224:245:K:A	extract
DGEDAADAAAAAPAK	1	1	yes	CG9894-PA:57:71:K:E,CG9894-PB:57:71:K:E	SG.KcGel,SG.KcM
DGEDAADAAAAAPAKESVK	1	1	yes	CG9894-PA:57:75:K:G,CG9894-PB:57:75:K:G	SG.KcC,SG.KcGel
DGEIVFGVAHIYASFNDTFVHVTDLSGR	1	1	yes	CG1524-PA:23:50:R:E,CG1524-PB:23:50:R:E,CG1527-PA:23:50:R:E	SG.KcGel,extract
DGFVMGEGAAVLLLEELEHAR	1	1	yes	CG12170-PA:252:272:R:A	SG.chr
DGGEYIQGQGPPRPQQPRPR	1	1	yes	CG5654-PA:300:319:R:R	SG.KcC,SG.KcGel,extract
DGNVLLHEMQIQHPTASMIAR	1	1	yes	CG8231-PA:59:79:K:A	SG.KcC,SG.KcNR,SG.chr
DGSGGQNSNNSTVGGAYGK	1	1	yes	CG10377-PA:175:193:R:L,CG10377-PB:175:193:R:L,CG10377-PC:175:193:R:L	SG.KcC,SG.KcGel,SG.KcM,SG.extract,SG.chr
DGSLNYIEENDEVLVAGFGR	1	1	yes	CG8415-PA:88:107:R:K	SG.KcGel,SG.KcM,extract,SG.chr
DGSLNYIEENDEVLVAGFGRK	1	1	yes	CG8415-PA:88:108:R:G	SG.KcC
DGTGSHLVSVPR	1	1	yes	CG7619-PA:164:175:K:G	SG.KcC,SG.extract
DLITNIGSGVGAAPAGGAAPAAAAAAPAAESK	1	1	yes	CG4087-PA:58:89:K:K	SG.Golgi,SG.KcGel,SG.KcM,SG.Mito,extract,SG.chr
DLKPENLLLASK	1	0	yes	CG18069-PA:136:147:R:A,CG18069-PB:136:147:R:A,CG18069-PC:136:147:R:A	SG.KcM
DLTTEKSAAVAEGGDAVAETAK	1	0	yes	CG13388-PA:74:95:K:G,CG13388-PB:74:95:K:G,CG13388-PC:74:95:K:G,CG13388-PD:74:95:K:G	SG.Golgi,SG.KcM
DLYANNVLSGGTTMYPGIADR	1	0	yes	CG7478-PA:293:313:K:M	SG.chr
DLYANSVLSGGTTMYPGIADR	1	0	yes	CG5178-PA:293:313:K:M	SG.chr
DLYANTVLSGGTTMYPGIADR	1	1	yes	CG12051-PA:293:313:K:M,CG4027-PA:293:313:K:M,CG4027-PB:293:313:K:M	SG.Golgi,SG.KcGel,SG.KcM,SG.Mito,extract,SG.extract,SG.chr
DMNILMR	1	0	no	CG7993-PA:190:196:D:S	COF.SCX.CYT
DNMATSDLSDILPEDVEEK	1	1	yes	CG10206-PA:216:234:R:V	SG.chr
DNYVPAVSALEQDIIEVDADTKEMLK	1	1	yes	CG3922-PB:82:107:R:L	SG.KcC,SG.KcNR,SG.chr
DQIKKQIR	1	0	yes	CG2137-PA:568:575:R:Q	COF.SAX.CYT
DQVVLLDTTR	1	0	no	CG1511-PA:83:92:A:E,CG1511-PB:50:59:A:E,CG1511-PC:83:92:A:E,CG1511-PD:83:92:A:E,CG1511-PE:83:92:A:E	COF.SCX.MEM
DSGAAILTQFFNR	1	0	no	CG9734-PA:22:34:T:F,CG9734-PB:22:34:T:F,CG9734-PC:22:34:T:F,CG9734-PD:22:34:T:F	COF.SAX.CYT
DSIGGGGAGQGGSAGAAALGAAAGAVGAAGGGGGGGGGQAFSFDK	1	0	yes	CG8057-PA:31:75:R:K	SG.chr
DSPQCATR	1	0	yes	CG8204-PA:34:41:R:E	SG.extract
EAAAGEDITPLADESIK	1	1	yes	CG13388-PA:103:119:K:S,CG13388-PB:103:119:K:S,CG13388-PC:103:119:K:S,CG13388-PD:103:119:K:S	SG.Golgi,SG.KcGel,SG.KcM,SG.KcNR,SG.Mito,SG.extract,SG.chr
EAAPSAAKPAAAAPK	1	1	yes	CG7977-PA:33:47:K:K	SG.KcC,SG.KcGel,SG.KcM
EADIDGDGQVNYEEFVTMMTSK	1	1	yes	CG8472-PA:128:149:R:-,CG8472-PB:128:149:R:-	SG.KcGel,SG.KcM,SG.Mito,extract,SG.chr
EAESNTDESATPVPIDVSTAPASNDVSKPLEIDTTLVK	1	1	yes	CG1910-PA:407:444:K:T,CG1910-PB:357:394:K:T,CG1910-PC:384:421:K:T,CG1910-PD:357:394:K:T	SG.KcGel,SG.KcM,SG.chr
EAFSLFDKDGDGTITTK	1	1	yes	CG8472-PA:15:31:K:E,CG8472-PB:15:31:K:E	SG.Golgi,SG.KcC,SG.KcGel,SG.KcM,SG.Mito,extract,SG.extract,SG.chr
EAIDDVNKNESETNVTNAEGGAK	1	1	yes	CG4170-PA:251:273:K:A,CG4170-PB:251:273:K:A,CG4170-PC:251:273:K:A,CG4170-PD:251:273:K:A	SG.KcC,SG.KcGel,SG.KcM,extract,SG.chr
ECEHKEEFIKR	1	0	no	CG14200-PA:75:85:F:G	COF.SCX.NUC
EDFENAVEIVR	1	0	no	CG41127-PA:89:99:H:K	COF.SCX.NUC
EDRKLFAER	1	0	no	CG18572-PA:523:531:T:V,CG18572-PB:523:531:T:V	COF.SCX.NUC
EDWQLLQQR	1	0	yes	CG5392-PA:471:479:R:G	COF.SAX.CYT
EGASLPFFASGVSAVIHPR	1	1	yes	CG3433-PA:169:187:K:N	SG.KcC,extract
EGGDEAAAVEK	1	0	yes	CG13388-PA:52:62:K:K,CG13388-PB:52:62:K:K,CG13388-PC:52:62:K:K,CG13388-PD:52:62:K:K	SG.KcGel
EGGDEAAAVEKK	1	1	yes	CG13388-PA:52:63:K:E,CG13388-PB:52:63:K:E,CG13388-PC:52:63:K:E,CG13388-PD:52:63:K:E	SG.KcGel,SG.KcM,SG.chr
EGGPEGGRGGR	1	0	no	CG12907-PA:45:55:E:E	COF.SAX.CYT
EGIVTSSDASEKEEIAK	1	1	yes	CG3152-PA:438:454:K:L	SG.KcC,SG.chr
EGTDSSQGKPQLVSNINACQSIVDAVR	1	1	yes	CG8351-PA:10:36:K:T	SG.KcN,SG.KcNR,SG.extract,SG.chr
EGTGTETPHSGCTVSLHYTGR	1	0	yes	CG4535-PA:22:42:K:L	SG.KcC,SG.KcN
EHLEKPIQVSNVFGQDEMIDCVGVTK	1	1	yes	CG4863-PA:199:224:R:G,CG4863-PB:186:211:R:G,CG4863-PE:186:211:R:G	SG.KcN,SG.KcNR,SG.chr
EICTQGDNQLTEETGK	1	1	yes	CG10576-PA:47:62:R:V	SG.KcM,SG.chr
EKLCYVALDFEQEMATAASSSSLEK	1	1	yes	CG12051-PA:215:239:K:S,CG4027-PA:215:239:K:S,CG4027-PB:215:239:K:S	SG.KcNR,extract,SG.chr
EKLSSMPVGGGGAVAAADAAPAAAAGGDKK	1	1	yes	CG4918-PA:60:89:R:E,CG4918-PB:60:89:R:E	SG.KcC,SG.KcM,extract,SG.chr
ELAQLNGTLR	1	0	yes	CG5836-PA:501:510:R:E	COF.SAX.CYT
ELLDLFWNNHEYGLTTPIK	1	1	yes	CG7266-PA:102:120:K:R,CG7266-PB:98:116:K:R,CG7266-PD:57:75:K:R	SG.extract,SG.chr
ELQQALIDDINDEKPYNEITSDIKDFSQR	1	1	yes	CG2922-PA:257:285:R:T,CG2922-PB:257:285:R:T,CG2922-PC:257:285:R:T,CG2922-PD:257:285:R:T,CG2922-PE:257:285:R:T,CG2922-PF:257:285:R:T,CG2922-PG:257:285:R:T	SG.KcC,SG.chr
EMIDLEATFEKLENELR	1	1	yes	CG1709-PA:93:109:R:E,CG1709-PB:93:109:R:E,CG1709-PC:93:109:R:E,CG1709-PD:93:109:R:E,CG1709-PE:93:109:R:E,CG1709-PF:93:109:R:E,CG1709-PG:93:109:R:E,CG1709-PH:85:101:R:E	SG.KcNR,SG.chr
EMPLGSTPYQAYSDFLSKPTPR	1	1	yes	CG5920-PA:241:262:K:L	SG.KcC,SG.KcM,extract,SG.chr
ETLDASALSPR	1	0	no	CG3273-PA:156:166:P:V	COF.SCX.MEM
EWSDTNVQHDIK	1	1	yes	CG4147-PA:103:114:R:F,CG4147-PB:103:114:R:F,CG4147-PC:103:114:R:F,CG4147-PD:103:114:R:F	SG.extract,SG.chr
FAGIDHIEPEIQSYINANLAK	1	1	yes	CG1469-PA:48:68:R:S,CG1469-PB:48:68:R:S,CG1469-PC:48:68:R:S	SG.KcC,extract,SG.chr
FGAGAVSAATTTPTTTESK	1	1	yes	CG8149-PA:269:287:R:D	SG.KcGel,SG.chr
FGAGAVSAATTTPTTTESKDAWSEK	1	1	yes	CG8149-PA:269:293:R:A	SG.KcC
FGAGAVSAATTTPTTTESKDAWSEKAR	1	0	yes	CG8149-PA:269:295:R:A	SG.KcC
FGGGGGGGDYHGIR	1	1	yes	CG10279-PA:179:192:R:N,CG10279-PB:38:51:R:N,CG10279-PC:38:51:R:N,CG10279-PD:35:48:R:N,CG10279-PE:38:51:R:N,CG10279-PF:38:51:R:N	SG.KcGel,SG.KcM,SG.extract,SG.chr
FGHVFMSETGTSVGEISGQSK	1	1	yes	CG10724-PA:133:153:R:S,CG10724-PB:129:149:R:S	SG.KcC
FGITPPAVANTATAVAVAINK	1	0	yes	CG8149-PA:195:215:K:S	SG.KcGel
FGLDATAVGDEGGFAPNIQSNK	1	1	yes	CG17654-PA:200:221:K:E,CG17654-PB:267:288:K:E,CG17654-PC:267:288:K:E,CG17654-PD:267:288:K:E,CG17654-PE:267:288:K:E	SG.KcGel,SG.KcM,SG.chr
FGLLLTQKPEPIY	1	1	yes	CG7637-PA:52:64:R:-	SG.KcGel,SG.extract,SG.chr
FGQPEIALGTIPGAGGTQR	1	1	yes	CG6543-PA:165:183:K:L,CG6543-PB:165:183:K:L	SG.KcGel,SG.KcM,extract,SG.chr
FGSINSGNFKGDLAQIGELVR	1	1	yes	CG9588-PA:154:174:R:N	SG.KcC
FLDVGLAR	1	0	no	CG17489-PA:145:152:C:T,CG17489-PB:145:152:C:T,CG17489-PD:145:152:C:T,CG17489-PE:145:152:C:T	COF.SCX.MEM
FQSSAVMALQEASEAYLVGLFEDTNLCAIHAK	1	1	yes	CG31613-PA:85:116:R:R	SG.KcNR,SG.extract,SG.chr
FTIDCTNIAEDSIMDVADFEK	1	1	yes	CG7434-PA:193:213:R:Y	SG.KcM,extract,SG.chr
GAAQDDTQXR	1	0	no		COF.SAX.CYT
GAFADFIIQHLQEGNEEEEELNQIKR	1	1	yes	CG6214-PA:863:888:K:Q,CG6214-PB:863:888:K:Q,CG6214-PC:863:888:K:Q,CG6214-PD:863:888:K:Q,CG6214-PE:863:888:K:Q,CG6214-PF:863:888:K:Q,CG6214-PG:863:888:K:Q,CG6214-PH:863:888:K:Q,CG6214-PI:863:888:K:Q,CG6214-PJ:863:888:K:Q,CG6214-PK:863:888:K:Q,CG6214-PL:863:888:K:Q,CG6214-PM:863:888:K:Q,CG6214-PN:863:888:K:Q,CG6214-PO:863:888:K:Q,CG6214-PP:863:888:K:Q,CG6214-PQ:863:888:K:Q	SG.Golgi,SG.KcNR,SG.Mito,SG.chr
GFRVGFSMPKSSLLLGEAEHSFGYCETGR	1	0	yes	CG30122-PB:373:401:R:K	SG.chr
GGDLVHVHYR	1	0	yes	CG14715-PA:40:49:K:G	SG.KcGel
GGGGGGGGGGGNVQPR	1	1	yes	CG3606-PA:260:275:R:D,CG3606-PB:260:275:R:D	SG.KcGel
GGNSQGGGGGGGGGGGYSR	1	1	yes	CG3606-PA:345:363:R:F,CG3606-PB:345:363:R:F	SG.KcGel
GGPQGGKPAGVPSRPPNAPGFPVQISQK	1	0	yes	CG5787-PA:624:651:K:R	SG.KcGel
GGPSSNFGQANR	1	1	yes	CG5787-PA:132:143:R:G	SG.KcGel
GGQSLRSLANGATSKLTTIEVDDR	1	0	no	CG4592-PA:19:42:C:S	COF.SCX.NUC
GGSSLLAIKK	1	1	yes	CG31617-PA:64:73:R:Y	SG.KcGel,SG.extract
GGVLEPKVELDHLGAVTDVSYSPDLK	1	1	yes	CG10724-PA:477:502:K:Y,CG10724-PB:473:498:K:Y	SG.KcC
GHVIDGVSEFPLVVSDEVQK	1	1	yes	CG5502-PA:144:163:K:V	SG.Golgi,SG.KcC,SG.KcGel,SG.KcM,SG.KcNR,SG.Mito,extract,SG.chr
GIYGHVNXR	1	0	no		COF.SCX.CYT
GKFPGAKLR	1	0	yes	CG11727-PA:764:772:R:S	COF.SAX.CYT
GNQALSAEK	1	0	yes	CG2720-PA:11:19:K:F	SG.KcGel
GNQALSAEKFDEAVAAYTEAIALDDQNHVLYSNR	1	1	yes	CG2720-PA:11:44:K:S	SG.KcC,SG.KcNR,SG.chr
GPYTAVAHALEIIPR	1	1	yes	CG8977-PA:431:445:K:T,CG8977-PB:431:445:K:T	SG.KcGel,SG.KcM,SG.KcNR,SG.Mito,SG.extract
GSSTSSSSIR	1	0	no	CG2914-PA:90:99:S:S	COF.SCX.CYT
GSVMILNCNQR	1	0	no	CG15701-PA:875:885:N:Q	COF.SCX.MEM,COF.SCX.NUC
GTCQGMRNAHYDKLDDDGIIAPGIR	1	0	yes	CG3180-PA:837:861:R:V	SG.chr
GTDLWLGVDALGLNIYEQDDRLTPK	1	1	yes	CG10701-PA:276:300:K:I,CG10701-PB:285:309:K:I,CG10701-PC:148:172:K:I,CG10701-PD:214:238:K:I,CG10701-PE:214:238:K:I,CG10701-PF:214:238:K:I,CG10701-PG:214:238:K:I,CG10701-PH:214:238:K:I,CG10701-PI:214:238:K:I,CG10701-PJ:214:238:K:I	SG.KcNR
GTLEVDELHSLALALDTEK	1	1	yes	CG1469-PA:135:153:R:Q,CG1469-PB:135:153:R:Q,CG1469-PC:135:153:R:Q	extract
GTSLVSAIQLLR	1	0	no	CG33261-PA:17:28:Y:C,CG33261-PB:17:28:Y:C,CG33261-PC:17:28:Y:C,CG33261-PD:17:28:Y:C,CG33261-PE:17:28:Y:C,CG33261-PF:17:28:Y:C	COF.SAX.CYT,COF.SCX.CYT
GVDLDQLLDMPNNQLVELMHSR	1	1	yes	CG8332-PA:22:43:R:A,CG8332-PB:21:42:R:A	SG.Golgi,SG.KcC,SG.KcGel,SG.KcM,SG.KcNR,extract,SG.chr
GVQAEEGER	1	0	no	CG4751-PA:56:64:E:A	COF.SCX.MEM
GVSVSYETVLR	1	0	yes	CG13203-PA:463:473:K:G	COF.SCX.CYT
HAPWLNYR	1	0	no	CG31179-PA:32:39:G:P	COF.SCX.MEM
HFDKDASGYISSAELR	1	1	yes	CG3201-PA:91:106:R:H	SG.Golgi,SG.KcC,SG.KcGel,SG.KcNR,SG.extract
HGDHNKTTHTAGFLANDRLLPQR	1	0	yes	CG10701-PA:197:219:R:V,CG10701-PB:206:228:R:V,CG10701-PC:69:91:R:V,CG10701-PD:135:157:R:V,CG10701-PE:135:157:R:V,CG10701-PF:135:157:R:V,CG10701-PG:135:157:R:V,CG10701-PH:135:157:R:V,CG10701-PI:135:157:R:V,CG10701-PJ:135:157:R:V	SG.KcC
HGGEAIDTPVFELK	1	1	yes	CG6335-PA:90:103:R:E,CG6335-PB:112:125:R:V	SG.KcC,SG.KcGel,SG.KcNR,SG.chr
HGGEAIDTPVFELKEVLTGK	1	1	yes	CG6335-PA:90:109:R:Y	SG.KcC
HGLGEPIAANYYQAQYDDYVPIR	1	1	yes	CG7054-PA:151:173:K:N	SG.KcC,SG.KcGel
HGTQLPYVRQAQKLGYDLLITNANDCTR	1	0	no	CG10038-PA:154:181:D:F,CG10038-PB:138:165:D:F	COF.SCX.CYT
HGYIGEFEIVDDHR	1	1	yes	CG2033-PA:44:57:K:S,CG2033-PC:44:57:K:S,CG2033-PD:44:57:K:S,CG2033-PE:44:57:K:S	SG.KcC,SG.KcGel,SG.chr
HTDKENPNCLSTEPLAISENSLK	1	1	yes	CG9318-PA:234:256:K:A	SG.KcNR,SG.chr
HYVTPIKAGR	1	0	no	CG3109-PA:150:159:D:V	COF.SAX.CYT
IAALQTVADQLIAQNHYASNLVDEK	1	1	yes	CG1977-PA:1449:1473:K:R	SG.Golgi,SG.KcC,SG.KcGel,SG.KcM,SG.Mito,SG.extract,SG.chr
IADVVYNASNNELVR	1	1	yes	CG7808-PB:79:93:R:T,CG7808-PC:78:92:R:T,CG7808-PD:78:92:R:T	SG.KcGel,SG.KcM,SG.extract,SG.chr,COF.SCX.MEM
IAHLLNEEEEDDFYK	1	0	yes	CG4621-PA:15:29:K:T	SG.KcGel
IATLEEELEEEQSNSEVLLDR	1	1	yes	CG15792-PA:1821:1841:R:S,CG15792-PB:1776:1796:R:S	SG.KcGel,SG.KcM,extract,SG.extract,SG.chr
IETTAGSNECACR	1	0	no	CG8909-PB:538:550:C:L	COF.SAX.CYT
IFLKEGKAIR	1	0	no	CG40445-PA:73:82:T:S	COF.SCX.MEM
IFMETFEQR	1	0	yes	CG2909-PA:351:359:R:M	COF.SCX.MEM
IFTNINAKTAER	1	0	no	CG1665-PA:283:294:C:S	COF.SCX.MEM
IFVCFAIQR	1	0	no	CG3739-PA:17:25:P:P	COF.SCX.CYT,COF.SCX.MEM,COF.SCX.NUC
IFVGGLTTEISDEEIK	1	1	yes	CG16901-PA:138:153:K:T,CG16901-PB:138:153:K:T,CG16901-PC:138:153:K:T	SG.Golgi,SG.KcGel,SG.KcM,SG.Mito,extract,SG.chr
IGEEQSTEDAEDGPPELLFIHGGHTAK	1	1	yes	CG4236-PA:354:380:K:I	SG.KcC,SG.KcGel,SG.extract,SG.chr
IGFFSVDPDTSANHLVFNR	1	1	yes	CG10506-PA:749:767:R:T	SG.KcC,SG.extract
IGFPAAQAAPAISSTFPFIFGNRK	1	1	yes	CG9735-PA:239:262:K:V,CG9735-PB:239:262:K:V	SG.KcC
IGGIGTVPVGR	1	1	yes	CG1873-PA:256:266:K:V,CG1873-PB:256:266:K:V,CG1873-PC:256:266:K:V,CG1873-PD:256:266:K:V,CG8280-PA:256:266:K:V,CG8280-PB:256:266:K:V	SG.Golgi,SG.KcC,SG.KcGel,SG.KcM,SG.KcN,SG.KcNR,extract,SG.chr,COF.SAX.CYT
IGGSLFDEEGSKIVEKLVEK	1	0	yes	CG3127-PA:251:270:K:A	SG.KcC
IGIIGGSGLDDPDILEQRQER	1	0	yes	CG4802-PA:18:38:K:V	SG.KcC
IGKNTPSYQSILENANVLAR	1	1	yes	CG6058-PA:187:206:K:Y,CG6058-PB:154:173:K:Y,CG6058-PC:154:173:K:Y,CG6058-PD:154:173:K:Y,CG6058-PE:154:173:K:Y,CG6058-PF:187:206:K:Y,CG6058-PG:187:206:K:Y,CG6058-PH:154:173:K:Y	SG.KcC
IGLTYLMQQLNKEGATALR	1	1	yes	CG8223-PA:332:350:K:Q	SG.KcC
IGNVGFFVEPTVFSDVKDDMR	1	1	yes	CG31075-PA:363:383:R:I	SG.KcC,SG.KcNR
IGPNSTLVFEVELK	1	1	yes	CG6226-PA:341:354:K:A	SG.KcGel,SG.KcN,SG.extract,SG.chr
IGQLSTITAQESSESQAAR	1	0	yes	CG3760-PB:93:111:K:V	SG.KcGel
IGQMGLGVAVLGGVVNSALYNVEGGHR	1	1	yes	CG10691-PA:9:35:R:A,CG10691-PB:9:35:R:A	SG.extract,SG.chr
IGSVAGGDVDPQHPPTNPIPDSLDTGEDLSYGPGIVSK	1	1	yes	CG1822-PB:316:353:K:L,CG1822-PC:316:353:K:L	SG.KcGel,extract,SG.chr
IGVLYFDEHPEAAHSGPPGLGGMFGDIFNR	1	0	yes	CG9853-PA:283:312:K:L	SG.KcC
IHEQLRLASGNR	1	0	no	CG17650-PA:85:96:S:E	COF.SCX.MEM
IIAEVLRQYPHIVKGHK	1	0	yes	CG6384-PA:341:357:K:N,CG6384-PB:341:357:K:N	SG.extract
ILDKLLGEEIGNVYNR	1	1	yes	CG40084-PC:425:440:R:E,CG40084-PD:425:440:R:E	SG.KcNR
IREAVQAGR	1	0	no	CG6617-PA:70:78:L:I	COF.SCX.MEM
IRFLVLDEADR	1	0	no	CG9748-PA:453:463:N:M	COF.SCX.MEM
ISGLIYEETR	1	1	yes	CG31611-PA:47:56:R:G,CG3379-PA:47:56:R:G,CG3379-PB:47:56:R:G,CG3379-PC:47:56:R:G	SG.KcGel,SG.extract,SG.chr,COF.SCX.MEM
IVDMPCNEMNVDHFIQEVEDVGR	1	1	yes	CG7340-PA:325:347:R:E,CG7340-PB:228:250:R:E,CG7340-PC:253:275:R:E	extract
IVELEEELR	1	1	yes	CG4898-PA:158:166:K:V,CG4898-PB:244:252:K:V,CG4898-PD:190:198:K:V,CG4898-PE:616:624:K:V,CG4898-PF:190:198:K:V,CG4898-PG:190:198:K:V,CG4898-PJ:190:198:K:V,CG4898-PK:190:198:K:V,CG4898-PL:190:198:K:V	SG.KcGel,SG.KcM,extract
IWDDERGVDDLR	1	0	yes	CG6621-PA:20:31:K:L	SG.KcC
IYKDIITGDEMFADTYK	1	1	yes	CG4800-PA:3:19:K:M	SG.KcC,SG.KcGel,SG.KcM,SG.KcNR,SG.chr
KAAEPAEELDAADEALAAEPK	1	1	yes	CG11901-PA:251:271:K:S,CG11901-PB:251:271:K:S	SG.Golgi,SG.KcC,SG.KcM,SG.KcNR,SG.extract,SG.chr
KAQLQIEQLTTELANEK	1	1	yes	CG15792-PA:1844:1860:R:S,CG15792-PB:1799:1815:R:S	SG.KcC,SG.KcGel,SG.KcNR,extract,SG.chr
KASCGLLAVNESR	1	0	no	CG17698-PB:38:50:N:C,CG17698-PC:38:50:N:C	COF.SCX.CYT,COF.SCX.NUC
KATEEEVEQASELR	1	1	yes	CG2947-PA:117:130:K:A,CG2947-PB:117:130:K:A,CG32789-PA:117:130:K:A	SG.KcC,SG.KcGel,SG.chr
KDETITAPTSLTTEDFANPSPK	1	1	yes	CG6008-PA:35:56:K:N	SG.chr
KDMVTQAR	1	0	no	CG12070-PA:76:83:C:D	COF.SCX.NUC
KDSPLLINR	1	0	no	CG33307-PA:107:115:F:Q	COF.SCX.NUC
KELLIAAR	1	0	yes	CG2905-PA:17:24:R:H	COF.SAX.CYT
KGESQTNVEIIGEQDFTR	1	1	yes	CG8977-PA:251:268:K:M,CG8977-PB:251:268:K:M	SG.KcC,SG.chr
KGGGYKVFLGGLPSNVTETDLR	1	1	yes	CG10377-PA:92:113:K:T,CG10377-PB:92:113:K:T,CG10377-PC:92:113:K:T	SG.KcC
KGKPGEDVYTNAEDELLSDR	1	1	yes	CG9286-PA:222:241:K:A	SG.KcC
KGSAVDEDDYHLTATPGAEVVYSEGTQK	1	0	yes	CG1822-PB:1203:1230:K:T	SG.KcGel
KGSITSVQAIYVPADDLTDPAPATTFAHLDATTVLSR	1	1	yes	CG11154-PA:328:364:K:A	SG.KcGel,SG.chr
KGSTSSSQTSFPSGGMTDAVR	1	1	yes	CG3710-PA:134:154:K:I	SG.KcC,SG.KcGel
KGVASLIEIENPNR	1	1	yes	CG11444-PA:106:119:K:V	SG.KcGel,SG.KcM
KGYPPNAPYNAIHVGAAAPDTPTELINQLASGGR	1	1	yes	CG2152-PA:150:183:R:L,CG2152-PB:16:49:R:L	SG.KcC
KKIAEGVIKR	1	0	yes	CG12766-PA:65:74:R:E	COF.SAX.CYT
KKLEITR	1	0	no	CG10932-PA:185:191:A:Q	COF.SCX.CYT,COF.SCX.NUC
KLAEEKAAR	1	0	yes	CG30389-PA:662:670:R:P,CG30389-PC:662:670:R:P	COF.SAX.CYT
KLGGVFAPR	1	0	no	CG11276-PA:22:30:D:P,CG11276-PB:22:30:D:P	COF.SCX.MEM
KLVLMEQDLER	1	1	yes	CG4898-PA:136:146:R:S,CG4898-PL:168:178:R:S	SG.KcC,SG.KcGel,extract
KMASALLR	1	0	no	CG32922-PB:771:778:T:L,CG32922-PC:55:62:T:L	COF.SAX.CYT
KQEKVQVR	1	0	no	CG7979-PA:274:281:A:V	COF.SCX.CYT,COF.SCX.MEM,COF.SCX.NUC
KQKIDSAMR	1	0	no	CG9220-PB:169:177:P:E,CG9220-PC:424:432:P:E	COF.SCX.CYT
KQLKKAALGR	1	0	no	CG8801-PA:127:136:C:M	COF.SCX.MEM
KSGNCEAIQR	1	0	no	CG15523-PA:1014:1023:V:G,CG15523-PB:1014:1023:V:G	COF.SCX.MEM
KSPEPVVAEAAEAPSSKR	1	0	yes	CG7185-PA:595:612:R:Y	SG.KcC
KTDALLMDTLQR	1	1	yes	CG12846-PA:126:137:R:S	SG.Golgi,SG.KcNR,SG.Mito,SG.chr
KVMSTDNETLR	1	0	no	CG15556-PA:205:215:Q:V	COF.SAX.CYT
KVVDHTTAAEYAAQLGIPFLETSAK	1	1	yes	CG3320-PA:132:156:K:S	SG.Golgi,SG.KcC,SG.KcNR,SG.Mito,SG.chr
KVVEPLR	1	0	yes	CG5581-PA:160:166:R:K	COF.SCX.MEM
LAAQFNLSHTVSDIR	1	1	yes	CG11139-PA:345:359:R:R	SG.KcGel
LAEAAAAAEQLEAER	1	0	yes	CG18005-PA:204:218:K:R	SG.KcGel
LAGGESDNEVDSFRPPNQNQSSASSTSR	1	1	yes	CG31852-PA:222:249:R:G	SG.KcC,SG.KcGel,SG.chr
LAGILEDR	1	1	yes	CG3845-PA:731:738:R:K,CG3845-PB:731:738:R:K	COF.SAX.CYT,COF.SCX.NUC
LALLSLFGVLMGK	1	0	yes	CG14472-PA:3183:3195:R:T	SG.KcGel
LCYVALDFEQEMATAASSSSLEK	1	1	yes	CG12051-PA:217:239:K:S,CG4027-PA:217:239:K:S,CG4027-PB:217:239:K:S	SG.KcNR,extract,SG.extract,SG.chr
LDKKAVGER	1	0	no	CG4264-PA:185:193:G:N,CG4264-PB:185:193:G:N,CG4264-PC:185:193:G:N,CG4264-PD:185:193:G:N,CG4264-PE:185:193:G:N,CG4264-PF:185:193:G:N	COF.SAX.CYT
LELIEDR	1	0	no	CG14431-PA:522:528:L:R	COF.SCX.MEM
LFNEHIERNFQAAAEDRPGGFPWGGEGQPLLPEEIAADGQDEEPANR	1	0	yes	CG14899-PA:206:252:R:A	SG.chr
LGAAITEAIGVQCSHFGVVPEILR	1	1	yes	CG13849-PA:101:124:K:G	SG.KcC,SG.KcN,SG.chr
LGAHGVLPSDASDQEK	1	0	yes	CG7697-PA:365:380:R:A	SG.KcGel
LGALDATAHQSK	1	1	yes	CG5809-PA:209:220:K:A	SG.KcC,SG.KcGel,SG.KcM,SG.extract
LGANSLLDLVVFGR	1	1	yes	CG17246-PA:450:463:R:A,CG17246-PB:450:463:R:A,CG17246-PC:450:463:R:A	SG.extract,SG.chr
LGATESSVVHTTPLPDFGGLHPDPNLTYAK	1	0	yes	CG5165-PA:241:270:R:D	SG.KcC
LGEPSEYAHLVQAIYENPLLNGEVIR	1	1	yes	CG7113-PA:221:246:R:I	SG.Golgi,SG.KcC,SG.KcM,SG.KcNR,SG.Mito,SG.chr
LGFSTSPDSTYTHWK	1	0	yes	CG6554-PA:304:318:R:Q	SG.KcC
LGGAVLRPAVLANSSGSNNSSTSPSAGEDSALLNNPFLR	1	1	yes	CG10225-PA:25:63:R:E	SG.KcC,SG.KcGel
LGGSALAQAYAQQGKDTPNLTR	1	1	yes	CG9127-PA:872:893:R:S,CG9127-PB:872:893:R:S,CG9127-PC:872:893:R:S	SG.KcC
LGISATFVDPTKLDLIK	1	1	yes	CG5345-PA:120:136:R:S	SG.KcC,SG.KcGel,SG.KcNR,SG.extract
LGITTAEISDGYEKALEK	1	0	yes	CG8258-PA:121:138:R:A	SG.KcC
LGITVWKEVTDDVNQGLK	1	0	yes	CG5174-PA:75:92:K:N,CG5174-PB:222:239:K:N,CG5174-PG:75:92:K:N,CG5174-PH:75:92:K:N,CG5174-PI:88:105:K:N,CG5174-PJ:75:92:K:N,CG5174-PK:75:92:K:N	SG.KcC
LGLKPLEVDSGPSK	1	0	yes	CG6686-PA:291:304:K:A,CG6686-PB:285:298:K:A	SG.KcGel
LGLLFVGSGVSGGEEGAR	1	0	yes	CG3724-PA:120:137:K:H	SG.KcGel
LGLVVTSGLGDNQQDQNLDEAAR	1	1	yes	CG11949-PA:516:538:R:N	SG.Golgi,SG.KcM,SG.chr
LGMTDNDHTAVGTK	1	1	yes	CG11139-PA:190:203:R:K	SG.KcC,SG.KcGel
LGNADSDEKLEAAVGKFLTPVILK	1	0	yes	CG8858-PA:19:42:R:M	SG.KcC
LGPALATGNTIVLKPAEQTSLTALYIAQLVK	1	1	yes	CG3752-PA:199:229:K:E	SG.KcM,SG.extract,SG.chr
LGPGGLDPADVFESLPDELK	1	1	yes	CG12019-PA:283:302:R:A	SG.KcGel,SG.KcNR
LGPNYLQIPVNCPYK	1	1	yes	CG6871-PA:364:378:R:V	extract,SG.chr
LGQSEATSLQHKLDVYR	1	1	yes	CG8036-PB:186:202:R:D,CG8036-PC:186:202:R:D,CG8036-PD:140:156:R:D	SG.KcC
LGSVAESTQDGITLPLEEYNGNKFR	1	1	yes	CG7415-PB:216:240:K:V,CG7415-PC:279:303:K:V	SG.KcC
LGTTNATTTLGGGGIFSKPAGQAAAPAASTFVGLGGIDVTATQPK	1	0	yes	CG7360-PA:254:298:K:L	SG.KcGel
LGVAPTSCHGWIIGEHGDSSVPVWSGVNIAGVR	1	1	yes	CG10160-PA:178:210:R:L	SG.KcN,SG.KcNR,SG.extract,SG.chr
LGVAYSNMGNFEKAEQAYAK	1	1	yes	CG5094-PA:190:209:R:A	SG.KcC
LGVMLVGWGGNNGSTLTAALEANRR	1	1	yes	CG11143-PA:62:86:K:Q	SG.KcC
LGYEHPVAIALDTKGPEIR	1	1	yes	CG7070-PA:105:123:K:T,CG7070-PB:84:102:K:T	SG.KcC,SG.KcNR
LGYVDPFAQGHGLLNVEK	1	0	yes	CG3991-PA:502:519:K:A,CG3991-PD:589:606:K:A	SG.KcC
LITALQLHQGR	1	0	no	CG1674-PA:525:535:E:D	COF.SCX.CYT
LKLKNNLAAQR	1	0	yes	CG5639-PA:1093:1103:R:T	COF.SCX.MEM
LKMAVEYIR	1	0	no	CG3796-PA:80:88:T:R	COF.SAX.CYT
LLINMSIGDWTSNRWVSSFNEVGEQLLGHTSQEVGEALENDPAK	1	0	yes	CG9633-PA:497:540:R:A	SG.chr
LLNNILER	1	0	no	CG10739-PA:462:469:E:P	COF.SAX.CYT
LLQAMCGSVEVR	1	0	no	CG6562-PA:188:199:W:T,CG6562-PB:188:199:W:T	COF.SCX.MEM
LNFDDNAQFR	1	1	yes	CG10622-PA:245:254:K:Q	SG.chr
LNTEESVIPYEYHHFDFCLGEEQNSPVENLGQVVFGER	1	1	yes	CG9318-PA:56:93:R:I	SG.KcNR,SG.chr
LPDPKLR	1	0	no	CG10680-PA:22:28:T:V	COF.SAX.CYT
LPIPLLENSCRRFLEATKPLLSPAEQAQTQQTVEQFR	1	0	yes	CG2107-PA:48:84:R:Q	SG.chr
LQGPSVLITVR	1	0	no	CG3356-PA:759:769:F:R	COF.SCX.CYT,COF.SCX.MEM
LQPLLNVSLR	1	0	no	CG11415-PA:126:135:S:G	COF.SCX.CYT
LSEASQAADESER	1	1	yes	CG4898-PA:81:93:K:I,CG4898-PB:167:179:K:A,CG4898-PC:314:326:K:A,CG4898-PD:113:125:K:A,CG4898-PE:539:551:K:A,CG4898-PF:113:125:K:A,CG4898-PG:113:125:K:A,CG4898-PH:551:563:K:A,CG4898-PI:314:326:K:A,CG4898-PJ:113:125:K:A,CG4898-PK:113:125:K:A,CG4898-PL:113:125:K:I	SG.KcGel,extract
LSSMPVGGGGAVAAADAAPAAAAGGDKK	1	1	yes	CG4918-PA:62:89:K:E,CG4918-PB:62:89:K:E	SG.KcC,SG.KcGel,SG.KcM,SG.KcNR,SG.Mito,extract,SG.extract,SG.chr
LTDEEVEQLLANMEDQQGNINYEEFVR	1	1	yes	CG3201-PA:116:142:K:M	SG.KcNR,extract,SG.extract,SG.chr
LTTNKEFLEKGSLEIVYVDYENIVNVVKPGNR	1	0	yes	CG7070-PA:145:176:K:V,CG7070-PB:124:155:K:V	SG.KcC,SG.extract
LTTTTALLSR	1	0	no	CG30051-PB:75:84:I:N	COF.SCX.MEM
LVLEVAQHLGENTVR	1	1	yes	CG11154-PA:72:86:R:T,CG11154-PB:72:86:R:T	SG.KcC,SG.KcGel,SG.KcM,SG.extract,SG.chr
LYTYVTYVPVSTFK	1	1	yes	CG1821-PA:99:112:K:N,CG1821-PB:99:112:K:N,CG1821-PC:99:112:K:N	SG.KcGel,SG.KcM,extract,SG.extract,SG.chr
NAFGCFDEENMGVLPEDR	1	1	yes	CG3595-PA:107:124:K:L	SG.KcM,extract,SG.chr
NAIVVFEGAPETSSR	1	1	yes	CG10922-PA:263:277:K:E,CG10922-PB:263:277:K:E	SG.KcGel,SG.KcM,SG.extract,SG.chr
NAYQEAFDIAK	1	1	yes	CG17870-PA:150:160:K:T,CG17870-PB:150:160:K:T,CG17870-PG:150:160:K:T,CG17870-PH:150:160:K:T	SG.KcGel,SG.KcM,SG.extract
NDLKDATQR	1	0	no	CG14104-PA:67:75:Y:V	COF.SCX.MEM
NFFDMLGR	1	0	no	CG31728-PA:3:10:C:V	COF.SAX.CYT
NFGVPTQETFQSVDLWER	1	1	yes	CG14996-PB:99:116:K:Q	SG.KcGel,SG.KcM,SG.KcNR,SG.Mito,extract,SG.chr
NFIDVGAGVVDEDYR	1	1	yes	CG4584-PA:88:102:K:G,CG4584-PB:74:88:K:G	SG.KcGel,SG.KcM,extract
NGAGLDYSHINGHGASLTHSNFPGIGQQLGLDGR	1	0	yes	CG10146-PA:143:176:R:A	SG.KcC
NGDSLTMHYTGTLQADGK	1	1	yes	CG9847-PA:43:60:K:K,CG9847-PB:58:75:K:K	SG.KcGel,SG.chr
NGFISHDEFSGPK	1	1	yes	CG9847-PA:200:212:K:H,CG9847-PB:215:227:K:H	SG.Golgi,SG.KcGel
NGTQIHGTITGVDVAMNTHLK	1	1	yes	CG10753-PA:21:41:K:S	SG.KcGel,SG.chr
NGVVTAGTASGICDGASAVIVASEEALKEYNLKPLAR	1	1	yes	CG4600-PA:244:280:K:L	SG.KcC,SG.KcN,SG.chr
NGYGFVEFEDYR	1	0	yes	CG10851-PA:37:48:K:D,CG10851-PB:37:48:K:D,CG10851-PC:37:48:K:D,CG10851-PD:37:48:K:D,CG10851-PE:37:48:K:D,CG10851-PF:37:48:K:D	SG.KcGel
NKAKGQFSSLR	1	0	no	CG5089-PA:21:31:S:R	COF.SCX.CYT
NKEEQLLR	1	0	yes	CG2272-PA:442:449:R:V	SG.extract
NKGLTLSNASQIR	1	0	no	CG3431-PA:123:135:Y:T	COF.SCX.MEM
NKSPNAPKR	1	0	yes	CG32696-PB:62:70:R:A	COF.SAX.CYT
NLEAEPR	1	1	no	CG9304-PA:241:247:I:F	COF.SAX.CYT,COF.SCX.CYT,COF.SCX.MEM
NMRSALATIR	1	0	yes	CG12333-PA:393:402:R:T	COF.SAX.CYT
NNQAKIPPQR	1	0	yes	CG9775-PA:239:248:R:R,CG9775-PC:239:248:R:R	COF.SAX.CYT
NNVYKAKLAEQAER	1	0	no	CG31196-PA:6:19:E:Y,CG31196-PB:6:19:E:Y,CG31196-PC:6:19:E:Y,CG31196-PD:6:19:E:Y	COF.SAX.CYT
NQVLGKR	1	0	yes	CG12008-PA:1373:1379:R:K,CG12008-PB:1373:1379:R:K,CG12008-PC:1373:1379:R:K	COF.SAX.CYT
NSELAAQAALR	1	0	no	CG31175-PB:33:43:I:G	COF.SAX.CYT
NSLNDPLNLVDR	1	0	no	CG15025-PA:22:33:H:E	COF.SCX.MEM
NYCNLNNAELANEFNGPISFIR	1	1	yes	CG1309-PA:369:390:R:R	SG.KcM,SG.chr
NYLRTEVNMELAKAR	1	0	no	CG11630-PA:88:102:Y:F	COF.SAX.CYT
PDDQDLLRQQLIPR	1	0	no	CG1705-PA:175:188:H:D	COF.SCX.CYT
PKNLTVR	1	0	no	CG33459-PA:49:55:T:L	COF.SCX.CYT,COF.SCX.NUC
PSKLSKIR	1	0	no	CG4111-PA:41:48:A:V,CG4111-PB:41:48:A:V	COF.SAX.CYT
PTMALSPSSPR	1	0	no	CG33352-PA:1114:1124:T:G	COF.SCX.MEM
PYVIIFNVAVSAR	1	0	no	CG4220-PA:60:72:Y:C,CG4220-PB:60:72:Y:C	COF.SCX.MEM
QAHQIQCVEDLVHEIFTVGPNFK	1	1	yes	CG4897-PA:184:206:R:Y	SG.KcNR,SG.extract,SG.chr
QAQPKEAQEPQIKKFEIYR	1	1	no	CG3283-PA:35:53:Q:W	COF.SCX.CYT,COF.SCX.MEM,COF.SCX.NUC
QATKDAGQIAGLNVLRVINEPTAAALAYGMDK	1	0	yes	CG8542-PA:203:234:R:T	SG.chr
QDEEDYQESPTVLIALLVR	1	1	no	CG31915-PA:21:39:G:N	COF.SCX.CYT
QGDDIKLEGANASAEEADEGTDITSESGVDVVLNHR	1	1	yes	CG4800-PA:38:73:R:L	SG.KcC
QGGGYDSGSGHR	1	0	yes	CG3606-PA:44:55:K:G,CG3606-PB:44:55:K:G	SG.KcGel
QGGLGSMDIPLLADK	1	1	yes	CG1633-PA:89:103:K:S,CG1633-PB:89:103:K:S	SG.Golgi,SG.KcGel,SG.KcNR
QGGSSQSYSR	1	0	yes	CG4429-PA:143:152:R:G,CG4429-PB:142:151:R:G,CG4429-PC:143:152:R:G	SG.KcGel
QGLDANVFAEIINSSTGR	1	1	yes	CG15093-PA:220:237:R:C,CG15093-PB:220:237:R:C	COF.SAX.CYT,COF.SCX.CYT,COF.SCX.NUC
QGLLPLTFANPADYDKIQPTSK	1	0	yes	CG9244-PB:710:731:K:I	SG.KcC
QGNVQELEHTIGLAVEAYK	1	1	yes	CG9629-PA:80:98:R:Q	SG.KcGel,SG.chr
QGQDGGYQQRPPGQQQGGHQQGR	1	1	yes	CG7439-PB:127:149:R:Q,CG7439-PC:130:152:R:Q	SG.KcGel,SG.extract,SG.chr,COF.SAX.CYT
QGQEGGYQQRPPGQQPNQTQSQGQYQSR	1	1	yes	CG7439-PB:357:384:R:G,CG7439-PC:360:387:R:G	SG.KcC,SG.KcGel,SG.chr
QGQEGGYQQRPPGQQQGGHQQGR	1	1	yes	CG7439-PB:150:172:R:Q,CG7439-PC:153:175:R:Q	SG.KcGel,SG.chr
QGSSGNVQVR	1	0	yes	CG9035-PA:89:98:K:L	SG.KcGel
QGVFDEATIATVLKEVLK	1	0	yes	CG7693-PA:136:153:K:G,CG7693-PB:136:153:K:G	SG.KcC
QGVTLPELGDYATGIFYLDEAQHAAAEKEFDDLAK	1	0	yes	CG9674-PA:149:183:K:S,CG9674-PD:149:183:K:S	SG.KcC
QIGAGQQSR	1	0	no	CG12835-PA:117:125:P:L	COF.SAX.CYT
QIPSNNVTR	1	0	yes	CG10382-PA:364:372:R:Q	COF.SAX.CYT
QKKHAAAAAAAAAAAAAAAAASAK	1	0	yes	CG3363-PA:911:934:K:I	SG.KcM
QLATGATHVHSR	1	1	yes	CG1469-PA:154:165:K:A,CG1469-PB:154:165:K:A,CG1469-PC:154:165:K:A	extract
QLDELKNELLSLR	1	1	yes	CG4111-PA:20:32:K:V,CG4111-PB:20:32:K:V	SG.Golgi,SG.KcC,SG.KcGel,SG.KcM,extract,SG.chr,COF.SCX.MEM,COF.SCX.NUC
QLGQEIENLK	1	0	yes	CG10236-PA:2649:2658:R:A	SG.KcM
QMVCDVLHPGLSSVNK	1	1	yes	CG3751-PA:23:38:K:T	SG.KcM,SG.chr
QNPLVTDLALYDIVHTPGVAADLSHIDTK	1	1	yes	CG7998-PA:46:74:K:S	SG.KcC,SG.chr
QPISEKER	1	0	no	CG4845-PA:858:865:P:S	COF.SCX.CYT
QQCLKLNAVIR	1	0	yes	CG1625-PA:1108:1118:R:Q	COF.SCX.CYT
QQEIGQLR	1	0	yes	CG32386-PA:471:478:R:S	COF.SAX.CYT
QQEQDANVSESSPHIANIGK	1	1	yes	CG17158-PA:196:215:R:M	SG.KcC,SG.extract,SG.chr
QQQERGLKEAYLEAVR	1	0	no	CG7865-PA:22:37:Q:I,CG7865-PB:29:44:Q:I	COF.SCX.CYT
QQQYTHEEYLEYER	1	1	yes	CG32190-PA:333:346:R:R	SG.KcM,SG.chr
QQSMDVALQR	1	0	no	CG33106-PA:1526:1535:Q:K,CG33106-PB:1526:1535:Q:K	COF.SCX.MEM,COF.SCX.NUC
QTQAKVDEVVGIMR	1	1	no	CG12210-PA:27:40:Q:V,CG12210-PB:50:63:Q:V	COF.SCX.MEM,COF.SCX.NUC
QTVSLPR	1	0	no	CG32046-PA:342:348:L:P,CG32046-PB:342:348:L:P	COF.SCX.MEM
QVVIDGETCLLDILDTAGQEEYSAMRDQYMR	1	1	yes	CG9375-PA:43:73:K:T	SG.KcNR
RAAPDITNTEFFPTLSAARPEEQR	1	1	yes	CG3760-PA:206:229:R:K,CG3760-PB:200:223:R:K	SG.KcC,SG.KcGel
REAKLKELR	1	0	yes	CG9150-PA:39:47:R:E	COF.SAX.CYT
REEAESEVAALNR	1	1	yes	CG4898-PA:46:58:R:R,CG4898-PB:132:144:R:R	SG.KcGel,SG.KcM,SG.Mito,SG.extract,SG.chr
RFVNADGNR	1	0	yes	CG2116-PA:457:465:R:E	COF.SCX.CYT
RGFAFVEFDDYDPVDK	1	1	yes	CG9983-PA:162:177:K:V,CG9983-PB:163:178:K:V,CG9983-PC:163:178:K:V,CG9983-PD:159:174:K:V,CG9983-PE:158:173:K:V,CG9983-PF:159:174:K:V	SG.KcGel,SG.chr
RGHVVQELEQLASER	1	0	yes	CG11563-PA:108:122:K:A	SG.KcGel
RGITPGYELVQIEGAIHEPTFR	1	1	yes	CG6866-PA:147:168:R:F,CG6866-PB:147:168:R:F	SG.KcC,SG.KcGel
RGLGGGDGSAEPGVHDQNPEGLQR	1	1	yes	CG5654-PA:242:265:R:G	SG.KcC,SG.KcGel
RGPGNNQNNNQNSGPGPNKR	1	1	yes	CG4170-PA:450:469:R:F,CG4170-PB:450:469:R:F,CG4170-PC:450:469:R:F,CG4170-PD:450:469:R:F	SG.KcGel
RGPLVVYDKDEGLR	1	1	yes	CG5502-PA:208:221:R:K	SG.Golgi,SG.KcC,SG.KcM,SG.Mito,SG.extract,SG.chr
RGPPFAFVEFEDAR	1	1	yes	CG6987-PA:42:55:R:D	SG.KcGel
RGTLEVDELHSLALALDTEK	1	1	yes	CG1469-PA:134:153:K:Q,CG1469-PB:134:153:K:Q,CG1469-PC:134:153:K:Q	extract,SG.chr
RNSQQLER	1	0	yes	CG15546-PA:49:56:R:P	COF.SCX.CYT
RPVGRPSAGSVNLNISR	1	1	yes	CG9745-PA:155:171:R:T,CG9745-PB:155:171:R:T,CG9745-PC:155:171:R:T	SG.KcC,SG.KcGel
RQQKQLDELR	1	0	no	CG33206-PA:225:234:A:Q,CG33206-PB:35:44:A:Q	COF.SCX.NUC
RSNSTGQDVALKKIR	1	0	no	CG10498-PA:26:40:A:L,CG10498-PB:26:40:A:L	COF.SCX.CYT
RSSMDMMPLCNQMVARTR	1	0	yes	CG33249-PA:339:356:R:T	SG.Golgi
RTSEAVPR	1	0	yes	CG12377-PA:548:555:R:V	COF.SAX.CYT
SAAQLPDSR	1	0	yes	CG5227-PA:814:822:R:T,CG5227-PB:814:822:R:T,CG5227-PC:814:822:R:T,CG5227-PD:814:822:R:T	SG.extract
SAAVAEGGDAVAETAK	1	1	yes	CG13388-PA:80:95:K:G,CG13388-PB:80:95:K:G,CG13388-PC:80:95:K:G,CG13388-PD:80:95:K:G	SG.Golgi,SG.KcGel,SG.KcM,SG.extract
SAAVAEGGDAVAETAKGEEGSPK	1	1	yes	CG13388-PA:80:102:K:E,CG13388-PB:80:102:K:E,CG13388-PC:80:102:K:E,CG13388-PD:80:102:K:E	SG.Golgi,SG.KcC,SG.KcGel,SG.KcM,SG.KcNR,SG.Mito,SG.extract,SG.chr
SAAVAEGGDAVAETAKGEEGSPKEAAAGEDITPLADESIK	1	1	yes	CG13388-PA:80:119:K:S,CG13388-PB:80:119:K:S,CG13388-PC:80:119:K:S,CG13388-PD:80:119:K:S	SG.KcC,SG.KcNR
SAEISNILEER	1	1	yes	CG3612-PA:47:57:R:I	SG.KcM,SG.extract,COF.SAX.CYT,COF.SCX.CYT,COF.SCX.MEM,COF.SCX.NUC
SALKLDSAGDDR	1	0	no	CG5061-PA:196:207:L:S	COF.SCX.CYT
SDNAAESFDDAVEER	1	1	yes	CG4236-PA:5:19:R:V	SG.chr,COF.SCX.CYT,COF.SCX.MEM
SELMITER	1	0	yes	CG9472-PA:101:108:R:H	COF.SCX.NUC
SFKILNDNWEFR	1	0	yes	CG32232-PA:355:366:R:A	COF.SCX.NUC
SGAGDQKEPSASSDVATNAGPEGSEDPDAFFIEQAK	1	1	yes	CG5325-PA:25:60:K:V,CG5325-PB:25:60:K:V	SG.KcC,SG.KcGel
SGDAAIVNLVPSKPLCVEAFQEFPPLGR	1	1	yes	CG8280-PA:396:423:K:F,CG8280-PB:396:423:K:F	SG.KcC,SG.KcM,SG.KcN,SG.KcNR,extract,SG.chr
SGDAQIVVAGGQESMSLAPHVMHLR	1	1	yes	CG9149-PA:104:128:R:Q	SG.KcC
SGDLLAPIIYCPELHFSEFASAIADMK	1	1	yes	CG7340-PA:545:571:K:N,CG7340-PB:448:474:K:N,CG7340-PC:473:499:K:N	extract
SGDTADDFIEGLR	1	1	yes	CG3201-PA:78:90:R:H	SG.KcGel,SG.KcM,extract,SG.extract,SG.chr,COF.SAX.CYT
SGGTLGDSFLDEGFLLDK	1	1	yes	CG7033-PA:205:222:K:K,CG7033-PB:203:220:K:K,CG7033-PC:203:220:K:K	SG.Golgi,SG.KcGel,SG.Mito,extract,SG.chr
SGGTLGDSFLDEGFLLDKKPGVHQPQRIENAR	1	1	yes	CG7033-PA:205:236:K:I,CG7033-PB:203:234:K:I,CG7033-PC:203:234:K:I	SG.KcC
SGKGKKRQQFSQEDLDELASDIR	1	0	yes	CG9630-PA:565:587:R:L	COF.SCX.CYT
SGLPAGSLAVSILPVTLDTPMNRK	1	1	yes	CG4665-PA:161:184:K:W	SG.KcC
SGLTINTLINTVGIHPTTAEEFTR	1	1	yes	CG2151-PA:450:473:K:L,CG2151-PB:555:578:K:L,CG2151-PC:467:490:K:L	SG.KcC,SG.KcGel,SG.KcN,SG.chr
SGNHGNFGQNSGNFGDNNR	1	1	yes	CG5787-PA:276:294:R:D	SG.KcGel,SG.chr
SGPVEFEKEEDPFGLDQFLNMAK	1	0	yes	CG8264-PA:500:522:R:K	SG.KcGel
SGPYGQLFRPDNFVYGQSGAGNNWAK	1	1	yes	CG3401-PA:84:109:R:G	SG.KcC,SG.extract
SGSAADTQAIADIVAYSLNYHENQTNK	1	1	yes	CG8392-PA:61:87:R:D	SG.KcC,SG.chr
SGSGGSTGYVPTGRPR	1	1	yes	CG9745-PA:206:221:K:G,CG9745-PB:206:221:K:G,CG9745-PC:206:221:K:G	SG.KcGel
SGSSGSGSSGSHDTLSR	1	1	yes	CG11982-PA:66:82:R:G	SG.KcC,SG.KcGel
SGSVSSASSSVSSSTENLK	1	1	yes	CG31363-PA:120:138:K:M,CG31363-PC:126:144:K:M,CG31363-PD:120:138:K:M,CG31363-PE:137:155:K:M,CG31363-PH:131:149:K:M	SG.KcGel,SG.KcM,extract
SGSVSSASSSVSSSTENLKMNSGSR	1	1	yes	CG31363-PA:120:144:K:S,CG31363-PC:126:150:K:S,CG31363-PD:120:144:K:S,CG31363-PE:137:161:K:S,CG31363-PH:131:155:K:S	SG.KcC
SGSVSSFPDALDENNTSSGLNSPTDSLPK	1	1	yes	CG5174-PA:180:208:R:-,CG5174-PB:327:355:R:-,CG5174-PH:160:188:R:-,CG5174-PI:173:201:R:-	SG.KcC,SG.KcGel,SG.KcM,SG.chr
SGTAPLMSTFRPTSSDMLSTLAISELEQESR	1	1	yes	CG9188-PA:469:499:K:L,CG9188-PB:501:531:K:L,CG9188-PC:484:514:K:L,CG9188-PD:469:499:K:L,CG9188-PE:469:499:K:L	SG.KcC,SG.KcGel,SG.chr
SGTGIGQITGGVR	1	0	no	CG8728-PA:38:50:G:T	COF.SAX.CYT
SGTIFDNVLITDDVELAAK	1	1	yes	CG9429-PA:323:341:K:A	SG.Golgi,SG.KcGel,SG.KcM,SG.Mito,SG.extract,SG.chr
SGTSQTTGNQGTGANPPANTAAAQKR	1	1	yes	CG6384-PA:423:448:K:R,CG6384-PB:423:448:K:R	SG.KcC
SGTVGFQHR	1	0	yes	CG7726-PA:153:161:K:L	SG.KcGel
SGVNPKSLR	1	0	no	CG17374-PA:62:70:D:G	COF.SAX.CYT
SGYGFINR	1	1	yes	CG5654-PA:73:80:K:N	SG.KcC,SG.KcGel,SG.KcM,SG.extract
SGYLGPEAASSSQLLTAVTVAK	1	1	yes	CG32409-PA:73:94:R:S	SG.KcGel,extract
SGYVSVPVDDFKIPVWQR	1	0	yes	CG14476-PA:770:787:R:G,CG14476-PB:770:787:R:G,CG14476-PC:770:787:R:G,CG14476-PD:770:787:R:G,CG14476-PE:770:787:R:G	SG.KcC
SINHHVAQALR	1	0	no	CG15325-PA:23:33:A:V	COF.SAX.CYT
SIPFPQRLGEPSEYAHLVQAIYENPLLNGEVIR	1	0	yes	CG7113-PA:214:246:K:I	SG.chr
SKNPSGIQSQQPER	1	0	no	CG32026-PA:232:245:E:C	COF.SCX.CYT
SLDSLSINELER	1	1	yes	CG10302-PA:651:662:R:F	SG.KcM,COF.SCX.MEM
SPIAISRR	1	0	no	CG5379-PA:49:56:Q:K	COF.SAX.CYT
SPIEEGGFR	1	0	no	CG3020-PA:368:376:L:D	COF.SCX.CYT
SPLPHDGAQWKIKR	1	0	yes	CG17197-PA:262:275:K:Y	COF.SCX.MEM
SQSPEELER	1	0	no	CG6604-PA:242:250:P:L	COF.SCX.NUC
SRNVTQLIR	1	0	yes	CG6811-PA:382:390:R:E	COF.SAX.CYT
SSSSSLHQR	1	0	no	CG31523-PA:343:351:D:K,CG31523-PB:343:351:D:K,CG31523-PC:343:351:D:K,CG31523-PD:343:351:D:K	COF.SAX.CYT
SSTAAVAAISPGIKK	1	1	yes	CG9745-PA:21:35:K:R,CG9745-PB:21:35:K:R,CG9745-PC:21:35:K:R	SG.KcGel
SVEMHHEALQEAVPGDNVGFNVK	1	1	yes	CG8280-PA:291:313:K:N,CG8280-PB:291:313:K:N	SG.KcC,SG.KcM,SG.KcNR,SG.extract,SG.chr
SVQNDVEAGVDEQLPR	1	0	no	CG4289-PA:19:34:T:E	COF.SCX.MEM
SVTDSGLKHLAR	1	0	no	CG9952-PA:384:395:V:M	COF.SCX.NUC
SYELPDGQVITIGNER	1	1	yes	CG10067-PA:240:255:K:F,CG12051-PA:240:255:K:F,CG18290-PA:240:255:K:F,CG18290-PB:240:255:K:F,CG4027-PA:240:255:K:F,CG4027-PB:240:255:K:F,CG5178-PA:240:255:K:F,CG7478-PA:240:255:K:F	SG.Golgi,SG.KcC,SG.KcGel,SG.KcM,SG.KcN,SG.KcNR,SG.Mito,extract,SG.extract,SG.chr,COF.SCX.NUC
TEIKSEAAPSTSAEAKPEDVR	1	0	no	CG8759-PA:5:25:L:V,CG8759-PB:5:25:L:V,CG8759-PC:5:25:L:V	COF.SAX.CYT,COF.SCX.CYT,COF.SCX.MEM,COF.SCX.NUC
TGAIVDVPVGDELLGR	1	1	yes	CG3612-PA:133:148:R:V	SG.Golgi,SG.KcGel,SG.KcM,SG.extract,SG.chr,COF.SCX.MEM
TGDLIVIQLGNAIEDFEQYATLNIER	1	1	yes	CG2979-PA:219:244:K:L	SG.extract
TGFAQMIQGLLSETFLQAHR	1	1	yes	CG4978-PA:283:302:R:I	SG.KcC,SG.chr
TGGGNNQSNGPLR	1	1	yes	CG9412-PA:663:675:R:G,CG9412-PB:663:675:R:G,CG9412-PC:663:675:R:G,CG9412-PD:663:675:R:G,CG9412-PE:663:675:R:G	SG.KcGel,extract
TGGIGNAISAFNQMQSPVSETPPAR	1	1	yes	CG3637-PA:311:335:R:K	SG.KcGel,SG.KcM
TGGIGNAISAFNQMQSPVSETPPARKEPIIIPK	1	1	yes	CG3637-PA:311:343:R:A	SG.KcC
TGGQRPPTQSELEQVAQELLLQR	1	0	yes	CG33106-PA:2119:2141:R:S,CG33106-PB:2119:2141:R:S	SG.KcGel
TGHSGGITQLR	1	0	no	CG10191-PA:15:25:F:F	COF.SAX.CYT
TGIESPFSLMTTFPR	1	0	yes	CG8209-PA:287:301:K:K	SG.KcGel
TGLIGGSGTAEIELK	1	1	yes	CG7070-PA:124:138:R:K,CG7070-PB:103:117:R:K	SG.KcGel,SG.KcM,SG.extract,SG.chr
TGPAPFKSPAQSGGSK	1	1	yes	CG5061-PA:241:256:R:A	SG.KcC,SG.extract
TGQAAGFAYTDANKAK	1	0	yes	CG17903-PA:45:60:K:G	SG.KcC
TGSQDSPLQVFHNPR	1	1	yes	CG6907-PA:240:254:K:Y	SG.KcC
TGTSTVLHTNIKDLLVTER	1	0	yes	CG3329-PA:245:263:K:V	SG.KcC
TGYLPLVKPYLR	1	1	yes	CG9012-PA:1443:1454:K:S,CG9012-PB:1443:1454:K:S,CG9012-PC:1443:1454:K:S,CG9012-PD:1443:1454:K:S	SG.KcC
TGYSFGYGFVDYK	1	1	yes	CG3056-PA:130:142:K:T,CG3056-PB:130:142:K:T	SG.KcGel,SG.extract
TKQSDVLR	1	0	no	CG15266-PA:125:132:L:D	COF.SCX.CYT,COF.SCX.MEM,COF.SCX.NUC
TLIDALDAILPPARPTDK	1	1	yes	CG8280-PA:227:244:K:A,CG8280-PB:227:244:K:A	SG.Golgi,SG.KcC,SG.KcGel,SG.KcM,SG.KcN,SG.KcNR,SG.Mito,extract,SG.chr
TMSRPVSTPEEIAQVATISANGDQAIGNLISEAMK	1	1	yes	CG12101-PA:153:187:K:K,CG12101-PB:153:187:K:K	SG.KcC,SG.KcM,SG.Mito,SG.extract,SG.chr
TNFEKDIIYLYQFSR	1	1	yes	CG4609-PA:99:113:K:T	SG.Golgi,SG.KcC,SG.KcNR,SG.extract
TNVEKVLER	1	0	yes	CG17248-PA:58:66:R:D,CG17248-PB:67:75:R:D,CG17248-PC:58:66:R:D,CG17248-PD:67:75:R:D,CG17248-PE:67:75:R:D	COF.SCX.MEM,COF.SCX.NUC
TVSGVNGPLVILDEVKFPK	1	1	yes	CG17369-PA:28:46:K:F,CG17369-PB:28:46:K:F	SG.KcC,SG.KcNR
VAADDVSAVKDDLK	1	1	yes	CG9894-PA:18:31:K:A,CG9894-PB:18:31:K:A	SG.KcC,SG.KcGel,SG.KcM
VAAEEVDAVKKDAVAAEEVAAEK	1	1	yes	CG2207-PA:17:39:K:A,CG2207-PB:17:39:K:A	SG.KcC,SG.KcGel
VAGSLNAYVVLEKPEIAQQALALNGSEFK	1	1	yes	CG12288-PA:202:230:K:E	SG.KcGel,SG.chr
VAKIEALR	1	0	no	CG1902-PA:27:34:T:T,CG1902-PC:27:34:T:T	COF.SAX.CYT
VALTGLTVAEYFR	1	1	yes	CG11154-PA:259:271:R:D	SG.KcGel,SG.KcM,SG.extract
VEGEILKVLR	1	0	yes	CG4297-PA:873:882:R:K	COF.SAX.CYT
VEICNLSPDSLTEDQQNSGK	1	0	yes	CG7563-PA:381:400:R:R,CG7563-PB:381:400:R:R	SG.KcM
VFDKDGNGFISAAELR	1	1	yes	CG8472-PA:92:107:R:H,CG8472-PB:92:107:R:H	SG.Golgi,SG.KcC,SG.KcGel,SG.KcM,SG.KcNR,SG.Mito,extract,SG.chr,COF.SAX.CYT
VFLGGLPSNVTETDLR	1	1	yes	CG10377-PA:98:113:K:T,CG10377-PB:98:113:K:T,CG10377-PC:98:113:K:T	SG.KcGel,SG.KcM,extract,SG.chr
VFTLAESLGGYESLAELPSIMTHASVPAEDRK	1	1	yes	CG5345-PA:327:358:K:T	SG.KcC,SG.KcNR,SG.chr
VGAETEKVFSEDFFGKLDGVANALDNVDAR	1	1	yes	CG1782-PA:687:716:R:I	SG.KcC
VGAGAPVYLAAVMEYLAAEVLELAGNAAR	1	1	yes	CG31618-PA:43:71:R:D	SG.KcGel,SG.Mito,extract,SG.chr
VGATAAVYSAAILEYLTAEVLELAGNASK	1	1	yes	CG5499-PA:47:75:R:D	SG.KcGel,SG.extract,SG.chr
VGDDADFKIYTEGAGEGEPEVR	1	1	yes	CG3937-PA:630:651:R:V,CG3937-PD:630:651:R:V	SG.KcC
VGDNVLYLAHR	1	0	yes	CG4205-PA:75:85:K:H	SG.KcGel
VGELLGDFNLFSEK	1	0	yes	CG17273-PA:172:185:R:F	SG.KcGel
VGELLGDFNLFSEKFK	1	1	yes	CG17273-PA:172:187:R:S	SG.KcC
VGGSSEVEVNEKK	1	1	yes	CG12101-PA:402:414:R:D,CG12101-PB:402:414:R:D	SG.KcGel,SG.chr
VGGSSQQQQAEEEANKSDDPVITQR	1	1	yes	CG32464-PB:430:454:R:F,CG32464-PD:205:229:R:F,CG32464-PF:29:53:R:F,CG32464-PG:185:209:R:F,CG32464-PJ:430:454:R:F,CG32464-PK:185:209:R:F,CG32464-PL:430:454:R:F	SG.KcC
VGIAIDVVGQAGKPK	1	1	yes	CG7762-PA:857:871:R:T	SG.KcC,SG.chr
VGIGFNNIFNRIPSFVGADK	1	1	yes	CG14648-PA:50:69:K:A	SG.Golgi,SG.KcC
VGINYQPPTVVPGGDLAK	1	1	yes	CG1913-PA:353:370:K:V,CG2512-PA:353:370:K:V,CG2512-PB:353:370:K:V,CG9476-PA:353:370:K:V	SG.KcC,SG.KcM,SG.KcN,SG.Mito,extract,SG.chr
VGINYQPPTVVPGGDLAKVQR	1	1	yes	CG1913-PA:353:373:K:A,CG2512-PA:353:373:K:A,CG2512-PB:353:373:K:A,CG9476-PA:353:373:K:A	SG.KcC
VGITGPSYNKTETVELATAGEFK	1	1	yes	CG10363-PA:61:83:K:Q	SG.KcC
VGPNLHGLIGR	1	1	yes	CG17903-PA:33:43:K:K	SG.KcC,SG.KcGel,SG.KcM
VGSHITGGDLYGLVHENTLVK	1	1	yes	CG3762-PA:140:160:K:H,CG3762-PB:140:160:K:H,CG3762-PC:140:160:K:H	SG.KcC,SG.KcNR,SG.chr
VGSVNADADSTLSGQFGVR	1	1	yes	CG5809-PA:78:96:K:G	SG.KcGel,SG.KcM,SG.extract,SG.chr
VGTNWAGTYQAVLSSDDPLFGGHNR	1	0	yes	CG33138-PA:623:647:R:I	SG.KcC
VGYYELVGEIIR	1	1	yes	CG12403-PA:43:54:R:L,CG3762-PA:43:54:R:L,CG3762-PB:43:54:R:L,CG3762-PC:43:54:R:L	SG.Golgi,SG.KcGel,SG.KcNR
VIDNGSGMCKAGFAGDDAPR	1	0	no	CG5178-PA:10:29:L:A	COF.SCX.CYT,COF.SCX.MEM,COF.SCX.NUC
VKDTDDVPMVLVGNKCDLEEER	1	1	yes	CG1956-PA:103:124:R:V	SG.KcNR,SG.chr
VKDYGLTLTEKextractDNTLFTEVAVQDQLLEGLK	1	0	yes	CG6647-PA:63:95:K:L,CG6647-PB:63:95:K:L	SG.chr
VKEILQEEEDLSEIVQLVGK	1	1	yes	CG12403-PA:476:495:K:A,CG3762-PA:476:495:K:A,CG3762-PB:476:495:K:A,CG3762-PC:476:495:K:A	SG.KcC,SG.KcNR
VLDEEMKEAFNNAYMELGGLGER	1	1	yes	CG5670-PA:547:569:K:V,CG5670-PB:508:530:K:V,CG5670-PC:508:530:K:V,CG5670-PD:508:530:K:V,CG5670-PE:508:530:K:V,CG5670-PF:508:530:K:V,CG5670-PG:508:530:K:V,CG5670-PH:508:530:K:V	SG.KcNR
VLETEAEPR	1	0	no	CG9056-PA:605:613:N:D	COF.SCX.CYT
VLGFCDFMLPSDKYPNGFKFNTDDINFPIDNLR	1	1	yes	CG5670-PA:570:602:R:F,CG5670-PB:531:563:R:F,CG5670-PC:531:563:R:F,CG5670-PD:531:563:R:F,CG5670-PE:531:563:R:F,CG5670-PF:531:563:R:F,CG5670-PG:531:563:R:F,CG5670-PH:531:563:R:F	SG.KcNR
VLYGKVALAGR	1	0	yes	CG32668-PA:118:128:R:P	COF.SCX.NUC
VNIEKQLR	1	0	yes	CG7457-PA:283:290:R:I	COF.SCX.MEM
VNQIGTVTESIAAHLLAK	1	1	yes	CG17654-PA:345:362:K:K,CG17654-PB:412:429:K:K,CG17654-PC:412:429:K:K,CG17654-PD:412:429:K:K,CG17654-PE:412:429:K:K	SG.KcC,SG.KcNR
VRADNSEPLGR	1	0	no	CG1242-PA:160:170:T:G	COF.SAX.CYT
VRKGSTAVGVR	1	0	no	CG17268-PA:28:38:A:G,CG3422-PA:28:38:A:G	COF.SAX.CYT
VRQIENSATDAR	1	0	no	CG2852-PA:164:175:V:D,CG2852-PB:79:90:V:D	COF.SAX.CYT
VSQELIDCDIDFVEDTTSKVEEEAR	1	1	yes	CG15784-PA:20:44:R:M	SG.KcC,SG.KcM,SG.KcN,SG.extract,SG.chr
VTNKAEYFASR	1	0	no	CG9968-PA:244:254:C:L,CG9968-PB:433:443:C:L	COF.SCX.MEM
VTRNIKGTAVNVQTR	1	0	no	CG6124-PA:25:39:N:D	COF.SCX.NUC
VVFVPVDVTSEKDVSAALQTAK	1	1	yes	CG7113-PA:52:73:K:D	SG.KcM,SG.chr
VVNKTKTIAKNR	1	0	yes	CG2086-PA:71:82:R:I	COF.SCX.CYT
WQSAIAIQR	1	0	yes	CG31735-PA:25:33:R:W,CG31735-PB:75:83:R:W	COF.SCX.CYT
WREFCESNPHIQQEGGAAGSGGSAGQAR	1	0	yes	CG8103-PA:182:209:K:S	SG.chr
YALKDEFSVENLQDFVEK	1	1	yes	CG8983-PA:326:343:K:L,CG8983-PB:201:218:K:L	SG.Golgi,SG.KcC,SG.KcGel,SG.KcNR,SG.Mito,SG.extract,SG.chr
YGDLLPADGCLIQSNDLKVDESSLTGESDHVK	1	1	yes	CG2165-PA:196:227:K:K,CG2165-PB:196:227:K:K	SG.KcNR
YGKVEQALEDQFTSGR	1	1	yes	CG7808-PB:158:173:K:I,CG7808-PC:157:172:K:I,CG7808-PD:157:172:K:I	SG.KcC,SG.KcGel,SG.KcM,SG.extract,SG.chr
YGMLVVR	1	0	no	CG8479-PA:78:84:G:I,CG8479-PB:78:84:G:I	COF.SCX.MEM
YGNKESNGEFGNELPQR	1	1	yes	CG11844-PA:108:124:R:Q,CG11844-PB:139:155:R:Q,CG11844-PC:108:124:R:Q	SG.KcC,SG.KcGel
YGQPSNSILASSGNGFAK	1	1	yes	CG2803-PA:22:39:K:F	SG.KcGel,SG.KcM
YGSPTPHGYEDFSR	1	0	yes	CG8597-PA:313:326:R:D,CG8597-PB:313:326:R:D,CG8597-PC:313:326:R:D,CG8597-PD:313:326:R:D,CG8597-PE:313:326:R:D	SG.KcGel
YNDLHYLFVR	1	0	yes	CG15396-PB:217:226:R:I	COF.SCX.CYT
YNFLNWFDER	1	0	no	CG7748-PA:67:76:W:A	COF.SCX.NUC
YQLLARESVSR	1	0	no	CG15313-PA:4:14:H:Q	COF.SCX.MEM
YTAPLAIGMAVTLGHLGTIR	1	1	yes	CG7777-PA:165:184:R:Y,CG7777-PB:165:184:R:Y	SG.Golgi,SG.KcNR,SG.Mito,SG.extract
YYQQQLQQR	1	0	no	CG15489-PA:8:16:N:Q	COF.SAX.CYT
SG.KcC=Shotgun Cytoplasmic fraction; SG.KcM=Shotgun Membrane fraction; SG.KcN=Shotgun Nuclear fraction; SG.chr=Shotgun Chromatin Fraction; SG.Golgi= Shotgun Golgi Fraction; SG.KcNR=Shotgun Rapamycin and Untreated Cells; SG.Mito=Shotgun Mitochondrial Fraction; SG.KcGel= Shotgun Gelfiltration; SG.extract=Lysate; COF.SAX.CYT=COFRADIC StrongAnionExchange Cytoplasmic Fraction; COF.SCX.CYT=COFRADIC Str…
